# Supplementary material for: Three-Dimensional Canopy Morphology and Wind Dynamics Govern Global Rainfall Interception
Source: Research Square preprint supplement (doi:10.21203/rs.3.rs-8346448/v1), 2026-01-30
Supplement: Supplementary file 1 [file bf346d3e0e56b22bbd7b3909.docx]

**Supporting Information for**

Three-Dimensional Canopy Morphology and Wind Dynamics Govern Global Rainfall Interception

Qingliang Li1,2,*, Xiaochun Jin1, Zhongwang Wei3,*, Cheng Zhang4, Wei Shangguan3, Jinlong Zhu1,2, Pingping Liu4, Xiaoning Li1, Yuguang Yan1,2, Jing Wang1,2, Yongjiu Dai3

1 College of Computer Science and Technology, Changchun Normal University, Changchun 130032, China

2 Research Institute for Scientific and Technological Innovation, Changchun Normal University, Changchun 130032, China;

﻿3 Southern Marine Science and Engineering Guangdong Laboratory (Zhuhai), and Guangdong Province Key Laboratory for Climate Change and Natural Disaster Studies, School of Atmospheric Sciences, Sun Yat-Sen University, Guangzhou, Guangdong, China

4 College of Computer Science and Technology, Jilin University, Changchun 130032, China

Corresponding author: Qingliang Li ([liqingliang@ccsfu.edu.cn)](mailto:liqingliang@ccsfu.edu.cn)); Zhongwang Wei ([weizhw6@mail.sysu.edu.cn)](mailto:weizhw6@mail.sysu.edu.cn))

**Contents of this file**

Text S1 to S5

Fig. S1 to S11

Table S1 to S6

Text S1. Parameterization scheme of canopy interception in CoLM2024

The canopy interception process in CoLM2024 is governed by the following water balance equation:

(1)

where is precipitation, is canopy drainage, and is throughfall. Throughfall is defined as

(2)

where the throughfall coefficient is given by

(3)

Here, is an empirical coefficient reflecting the water-holding capacity of leaves (set to 0.25), is the extinction coefficient, and represents the sum of leaf and stem area index. The canopy drainage consists of two components: (i) drainage from the effective precipitation fraction of the canopy (), and (ii) drainage caused by water exceeding the maximum canopy storage capacity (). The latter is represented as

(4)

The drainage from effective precipitation can be expressed as

(5)

where denotes the rainfall intensity over the fraction of the canopy that effectively intercepts precipitation, and is the proportion of intercepted rainfall plus pre-existing canopy storage that exceeds within a grid cell.

Text S2. The primary components of DSR model

The DSR model comprises three main components: Analytical Expression Generation (Text S3), which describes how symbolic expressions are generated using a recurrent neural network (RNN). Reinforcement Learning Strategy (Text S4), which details the optimization of the RNN policy to improve the accuracy and compactness of generated expressions.

Text S3. Analytical Expression Generation

The DSR model represents symbolic expressions as binary trees, where nodes correspond to variables, constants, or operations. Following a sequence-oriented approach, an RNN is employed to generate token sequences that define valid expressions. The generation process begins with a start symbol , from which the RNN computes the initial hidden state . At each subsequent time step , takes the previous token . as input and updates the hidden state according to:

(6)

where where denotes the trainable parameters. The hidden state is then projected linearly,

(7)

and passed through a softmax function to yield a categorical distribution over possible rule:

, for (8)

Here, are parameters of the linear layer. A rule is then sampled from this distribution and used as the input at the next step. After steps, a complete sequence is obtained, with overall probability

(9)

If the generated sequence terminates prematurely with non-terminal symbols, terminal rules are appended to complete the expression. Conversely, if a valid expression is produced before reaching step , the remaining steps are discarded. This sequential sampling process allows the RNN to efficiently traverse the symbolic search space and generate interpretable candidate equations.

Text S4. Reinforcement Learning Strategy

Symbolic regression involves non-differentiable objectives, making direct gradient-based optimization of discrete tokens infeasible. To address this, the DSR model employs reinforcement learning1, where the RNN acts as a policy network that samples candidate expressions from a categorical distribution. Each candidate expression *f* is evaluated on the target data, with constants optimized by the L-BFGS routine to minimize prediction error. A reward signal is then assigned as

(10)

where NRMSE is the normalized root mean squared error. To train the RNN, DSR adopts a risk-seeking policy gradient with entropy regularization, which prioritizes high-reward expressions while maintaining sufficient exploration. The learning objective is

(11)

and its gradient is given by

(12)

where denotes the empirical -quantile of the reward distribution. In practice, a Monte Carlo estimate with samples is applied:

(13)

where is the empirical threshold reward, and is the indicator function. This training scheme gradually biases the policy toward expressions that achieve strong predictive accuracy, resulting in compact and data-consistent symbolic models.

Text S5. Precipitation partitioning in the minimal stochastic water balance model

Following Good et al. (2017)2 , annual precipitation is partitioned into transpiration (), soil evaporation (), , canopy interception loss (), and runoff ():

(14)

Precipitation is represented as a marked Poisson process characterized by storm frequency and mean storm depth . Dimensionless parameters include the aridity index , the soil storage ratio, the canopy storage ratio , and the wilting threshold . Canopy interception is treated as a censoring process, yielding throughfall and interception loss rate ()

(15)

Interception reduces the available evaporative demand, leading to the effective aridity and storage ratios:

(16)

Relative soil moisture is defined as

(17)

where is the volumetric soil moisture, is the hygroscopic point (residual soil water content), and is the field capacity. Thus represents the effective relative soil water availability. At steady state, follows a truncated gamma distribution determined by and . Its expectation is

(18)

The transpiration fraction within evapotranspiration is defined as

(19)

where is the relative soil moisture threshold for transpiration. The mean value is

(20)

The resulting analytical expressions for the partitioning of precipitation are:

(21)

(22)

(23)

This framework explicitly links climate, soil and vegetation properties, providing a closed analytical representation of precipitation partitioning into , , and .


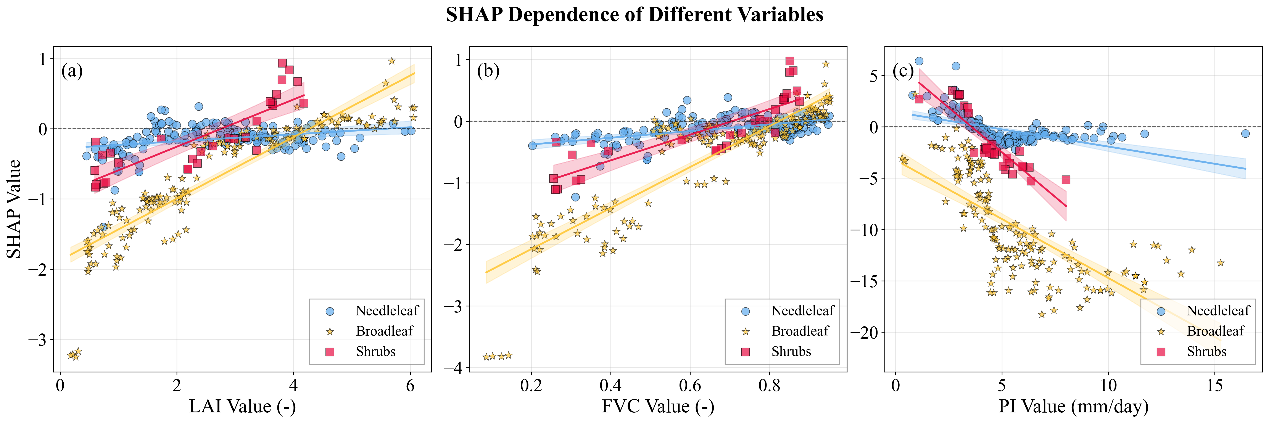


**Fig. S1.** SHAP dependence plots for Leaf Area Index (LAI), Fractional Vegetation Cover (FVC), and precipitation intensity (PI), each point represents one sample on test set. Blue circles, yellow stars, and red squares represent needleleaf, broadleaf, and shrub land types, respectively. Solid lines show linear regression fits for each vegetation type, while shaded areas represent the 95% confidence intervals around the regression lines.

**Fig. S2.** Boxplots, bar charts, and violin plots of KGESS values for evapotranspiration validated against flux-tower observations across Schemes 1–4.

**Fig. S3. a**, Differences in global runoff between Scheme 4 and Scheme 3. **b-g**, Cumulative comparisons at representative sites for 2000–2019. Differences are calculated as runoff from Scheme 4 minus runoff from Scheme 3.


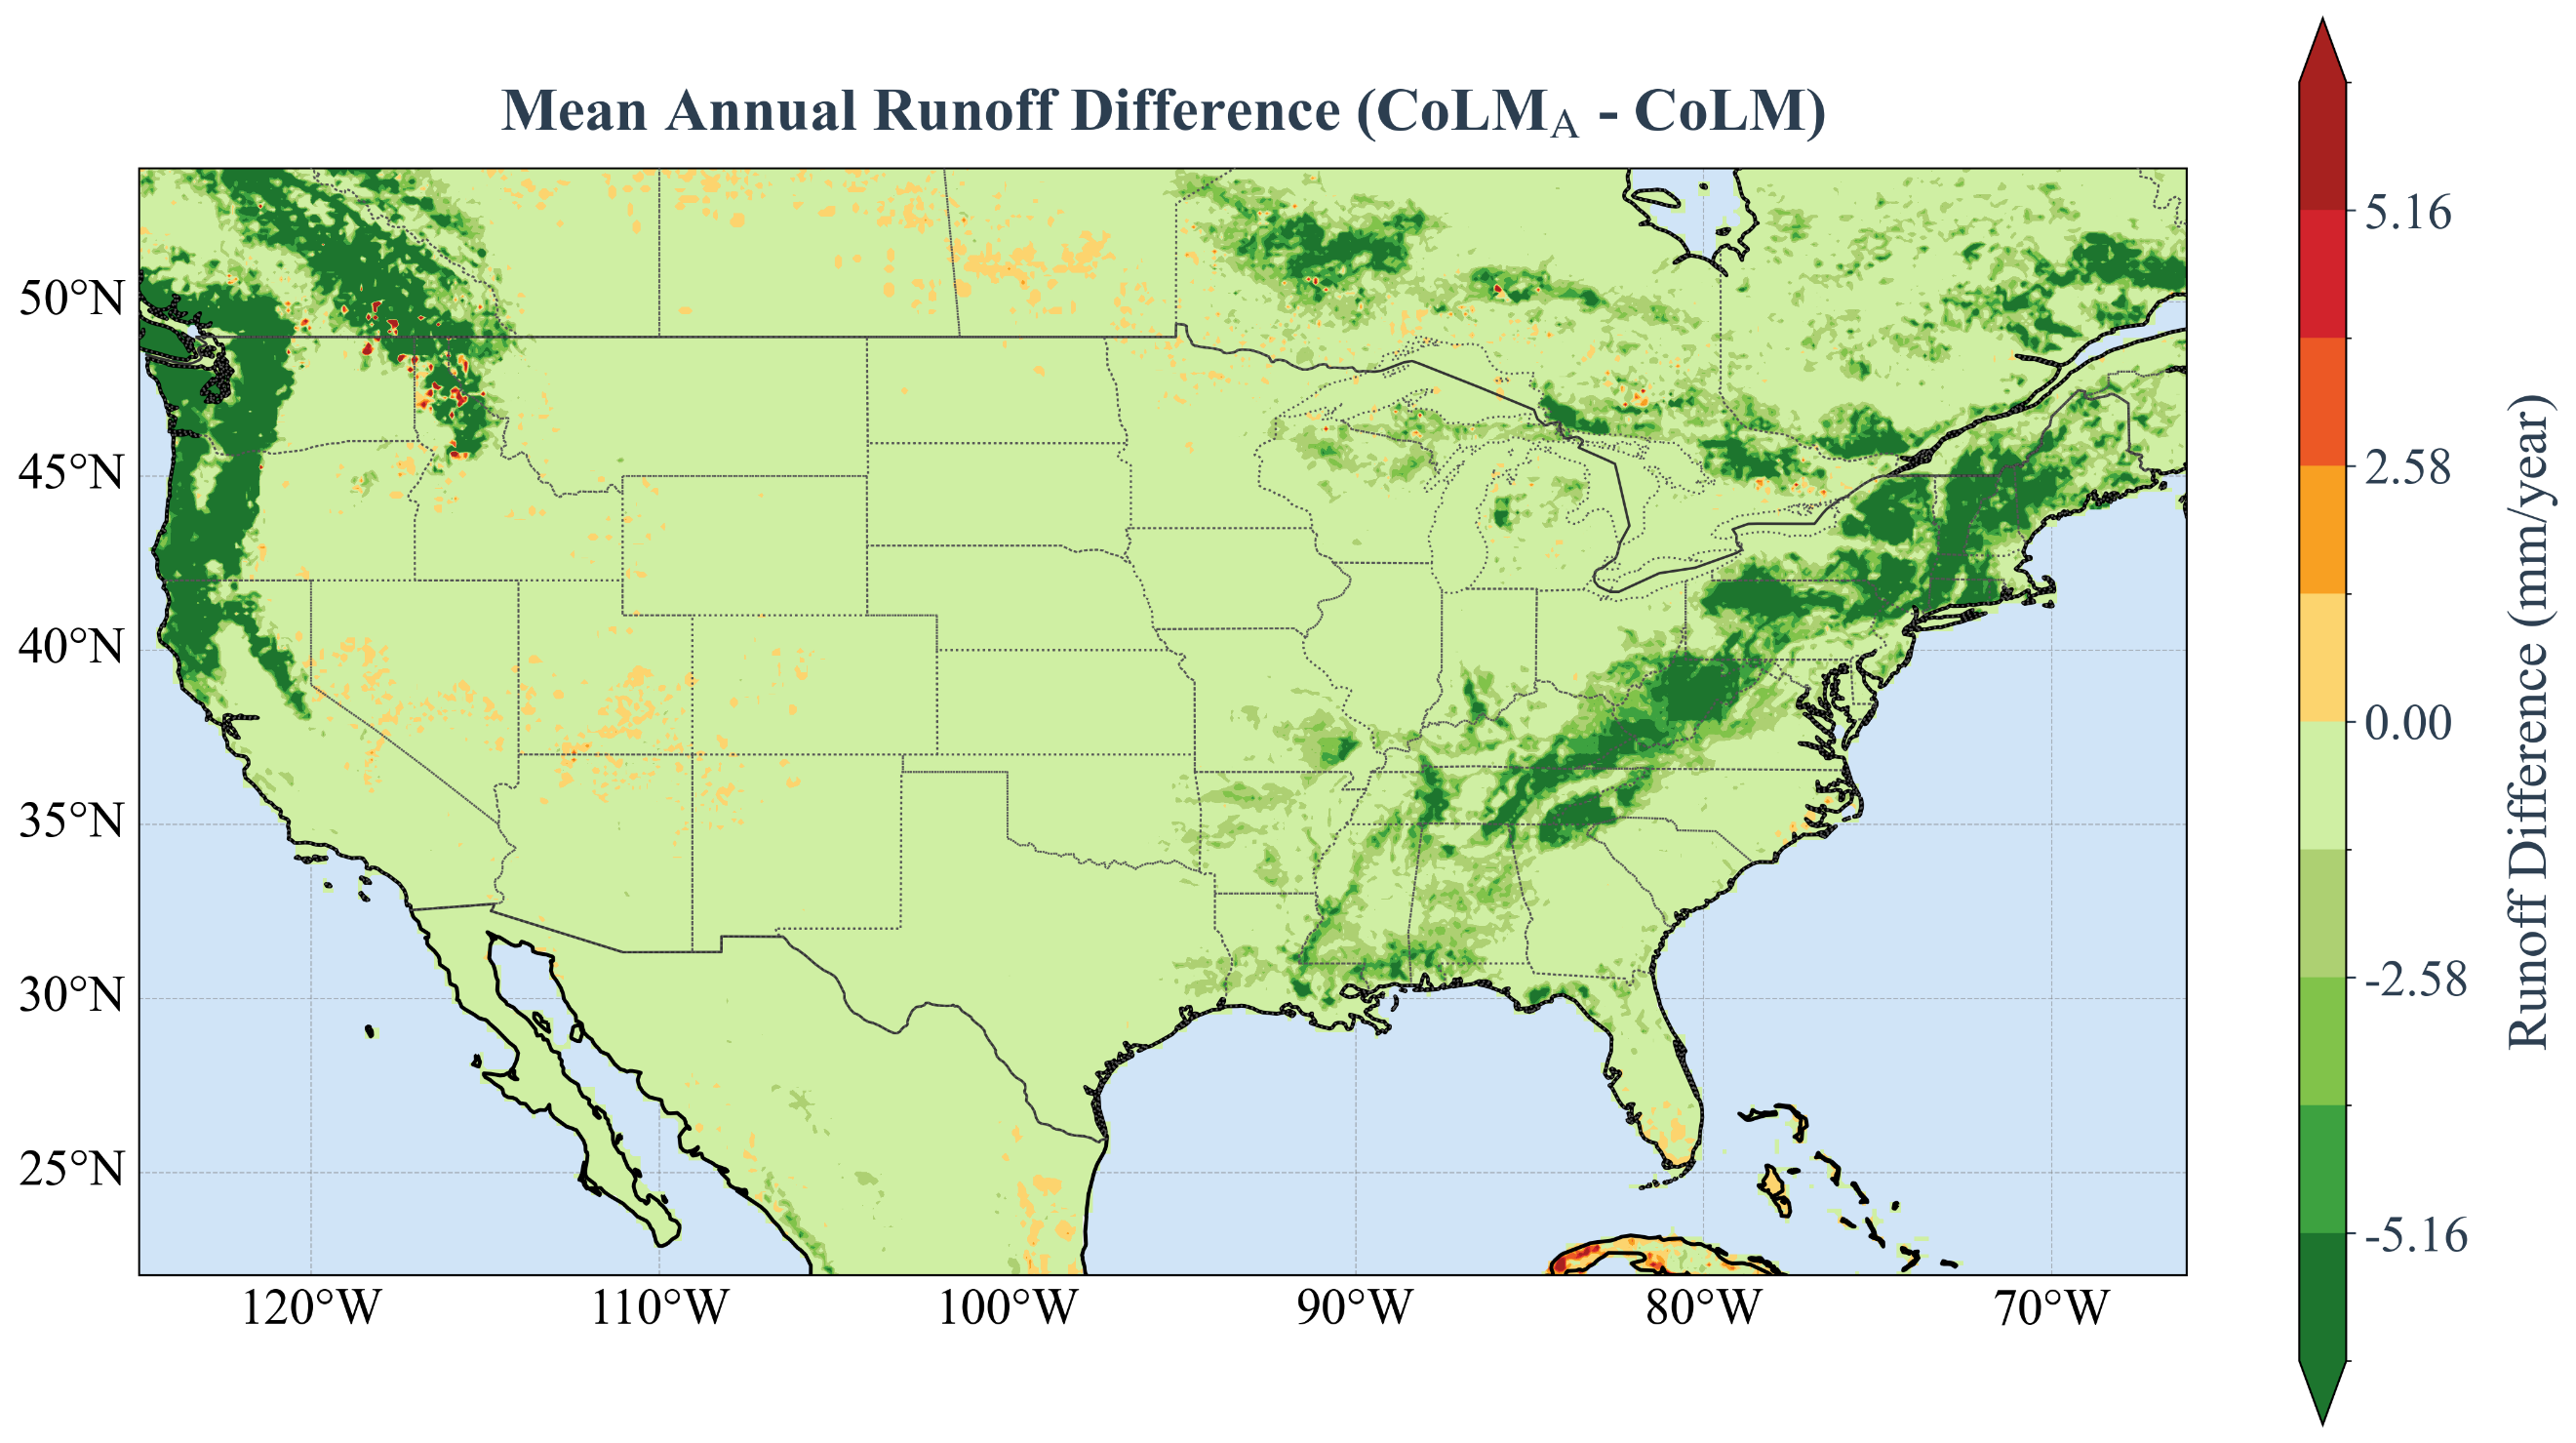


**Fig. S4.** Interannual differences in runoff between CoLMA and CoLM, calculated as CoLMA – CoLM.

**Fig. S5.** Global pattern of the canopy interception loss (I) estimated in this study, along with its distribution across major climate regions.

**Fig. S6.** Spatial differences in canopy interception loss (I) between this study and GLEAM v4.2a and Lian (2022) by climate zone (2000–2020), computed as This Study – Reference Product.

**Fig. S7.** Same as Fig. S6, but canopy interception loss rate (I/P).

**Fig. S8.** Spatial distributions of trends in Leaf Area Index (LAI) and wind speed during 1982–2020.

**
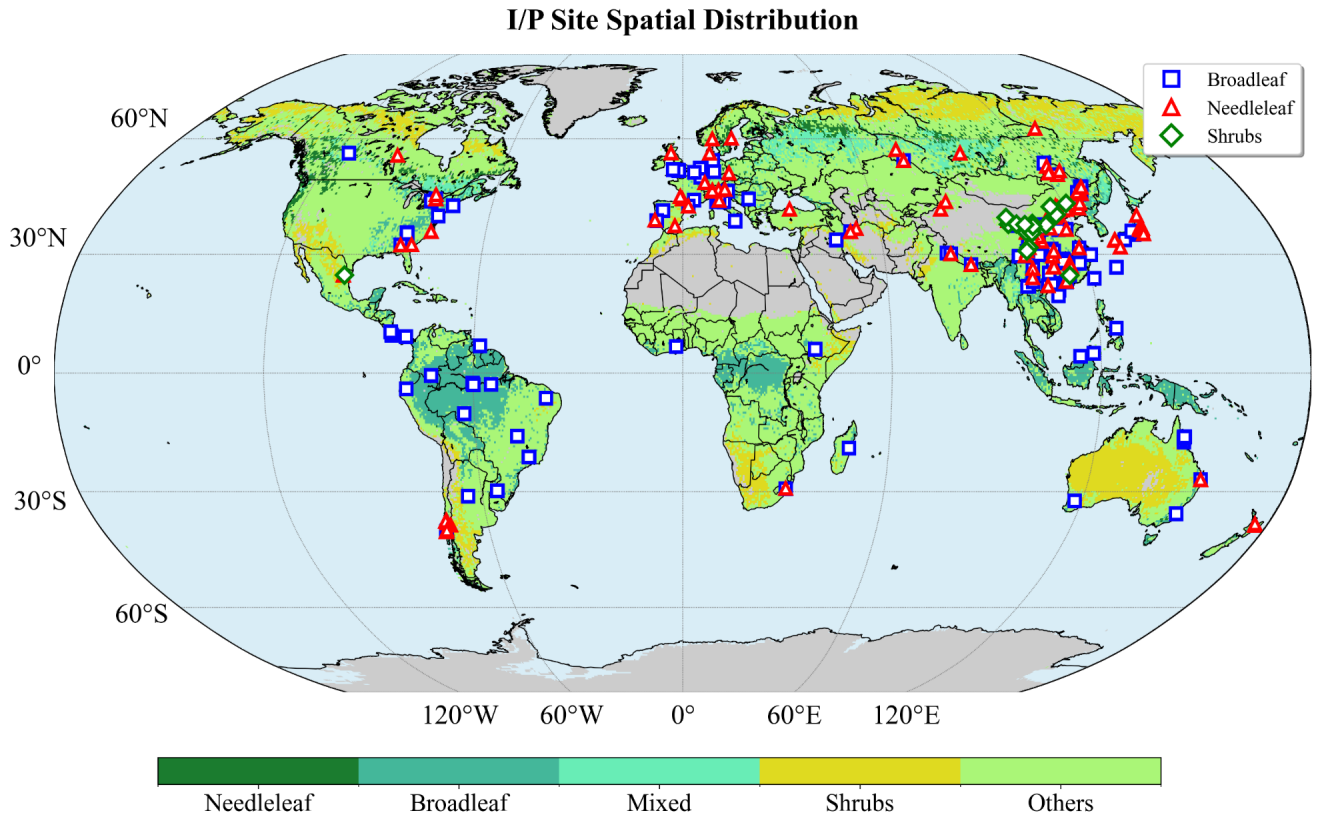
**

**Fig. S9.** Spatial distribution of observed canopy interception loss ratio (I/P) for needleleaf, broadleaf, and shrubland sites.

**Fig. S10.** Comprehensive overview of the FC-DSR model. **a**, The black rectangle is all the tokens used to generate symbolic expressions. Different colors represent different types of symbols, defined by usage. The red rectangle shows detailed information about the input variables. **b**, The physical expression of canopy interception and the structural form of the parameter expressions optimized by the FC-DSR algorithm. **c**, The training data were first processed using a random over-sampling algorithm to address data imbalance. A random forest model was then trained on the oversampled data, and the SHAP values were subsequently computed using the testing dataset. In the FC-DSR framework, the probability of a variable being selected as a terminal node is increased proportionally to its SHAP value, which reflects its contribution to the model’s prediction. **d**, The process of expression generation involves sequentially selecting tokens. Categorical distribution is the probability from the RNN cell and the colors represent the category of token; the color of the histogram corresponds to a. Nested functions prior used to constrain the nested level at which the exponential function appears. Canopy interception prior represents the choice of tokens and sets the probability of the important feature as 1.

**Fig. S11.** The schematic overview of the FC-DSR model and the setups of canopy interception prior to the experiment.

**Table S1.** The parameterization scheme of canopy maximum water storage capacity (). Here, denotes the sum of the leaf area index and the stem area index. is a function of the atmospheric forcing temperature (). ρ_sno is the snow density of accumulated snowfall. is the vegetation leaf surface temperature, and is the freezing temperature.

| **Land Surface Model Name** | **parameterization** | **Precipitation Form** | **Other Settings** |
| --- | --- | --- | --- |
| CoLM20143 |  | All precipitation | - |
| CLM4.54 |  | All precipitation | - |
| CLM55 |  | Rainfall | - |
|  | Snowfall | - |
| JULES6 |  | Rainfall | - |
|  | Snowfall | - |
| MATSIRO7 |  | All precipitation | Includes canopy energy balance with phase change |
| VIC8 |  | Rainfall | Includes canopy energy balance with phase change |
|  | Snowfall |
| Noah-MP9 |  | Rainfall | Includes canopy energy balance with phase change, incorporating wind-induced canopy sway |
|  | Snowfall |

**Table S2.** Parameterization of in Scheme 1 and Scheme 3 based on International Geosphere–Biosphere Programme (IGBP) land-cover types. Here, denotes the canopy water storage capacity per unit leaf area index, and denotes the storage capacity per unit stem area index. Land-cover types follow the IGBP classification: ENF (Evergreen Needleleaf Forest), DNF (Deciduous Needleleaf Forest), EBF (Evergreen Broadleaf Forest), DBF (Deciduous Broadleaf Forest), CSH (Closed Shrubland), OSH (Open Shrubland), MF (Mixed Forests), WSA (Woody Savannas), SAV (Savannas), GRA (Grasslands), WET (Permanent Wetlands), CRO (Croplands), URB (Urban and Built-up), CNA (Cropland/Natural Vegetation Mosaic), and BAR (Barren or Sparsely Vegetated).

| Parameterization | Species |  |  |
| --- | --- | --- | --- |
|  | ENF | 0.29 | 0.09 |
| DNF | 0.29 | 0.09 |
| EBF | 0.20 | 0.09 |
| DBF | 0.18 | 0.09 |
| CSH | 0.23 | 0.09 |
| OSH | 0.23 | 0.09 |
| MF | 0.23 | 0.09 |
| WSA | 0.23 | 0.09 |
| SAV | 0.1 | 0.03 |
| GRA | 0.1 | 0.03 |
| WET | 0.1 | 0.03 |
| CRO | 0.1 | 0.03 |
| URB | 0.1 | 0.03 |
| CNA | 0.1 | 0.03 |
| BAR | 0.1 | 0.03 |

**Table S3.** Parameterization of in Scheme 2 and Scheme 4 based on IGBP land-cover types. Here, refers to canopy depth, to canopy width, to the ratio of tree height to canopy width, and to wind speed. The definitions of other variables are consistent with those in Table S2.

| Parameterization | Species |  |  |
| --- | --- | --- | --- |
|  | ENF | 0.29 | 0.09 |
| DNF | 0.29 | 0.09 |
|  | EBF | 0.20 | 0.09 |
| DBF | 0.18 | 0.09 |
|  | CSH | 0.23 | 0.09 |
| OSH | 0.23 | 0.09 |
|  | MF | 0.23 | 0.09 |
|  | WSA | 0.23 | 0.09 |
| SAV | 0.1 | 0.03 |
| GRA | 0.1 | 0.03 |
| WET | 0.1 | 0.03 |
| CRO | 0.1 | 0.03 |
| URB | 0.1 | 0.03 |
| CNA | 0.1 | 0.03 |
| BAR | 0.1 | 0.03 |

**Table S4.** Site information used for evapotranspiration validation in the improved Budyko experiment. The sites are sourced from FLUXNET201510, OzFlux11, and La Thuile datasets10 , with the La Thuile dataset having since been superseded by the FLUXNET2015 dataset.

| **ID** | **Site Name** | **Observation Start Year** | **Observation End Year** | **Source** |
| --- | --- | --- | --- | --- |
| 1 | AT-Neu | 2002 | 2012 | FLUXNET2015 |
| 2 | AU-ASM | 2011 | 2017 | OzFlux |
| 3 | AU-Cum | 2013 | 2018 | OzFlux |
| 4 | AU-DaP | 2009 | 2012 | OzFlux |
| 5 | AU-Dry | 2011 | 2015 | OzFlux |
| 6 | AU-Emr | 2012 | 2013 | OzFlux |
| 7 | AU-Gin | 2012 | 2017 | OzFlux |
| 8 | AU-How | 2003 | 2017 | OzFlux |
| 9 | AU-Lit | 2016 | 2017 | OzFlux |
| 10 | AU-Otw | 2009 | 2010 | OzFlux |
| 11 | AU-Rob | 2014 | 2017 | OzFlux |
| 12 | AU-Sam | 2011 | 2017 | OzFlux |
| 13 | AU-TTE | 2013 | 2017 | OzFlux |
| 14 | AU-Tum | 2002 | 2017 | OzFlux |
| 15 | AU-Whr | 2015 | 2016 | OzFlux |
| 16 | AU-Ync | 2011 | 2017 | OzFlux |
| 17 | BE-Vie | 1997 | 2014 | FLUXNET2015 |
| 18 | BR-Sa3 | 2001 | 2003 | FLUXNET2015 |
| 19 | CA-NS6 | 2002 | 2004 | FLUXNET2015 |
| 20 | CA-NS7 | 2003 | 2004 | FLUXNET2015 |
| 21 | CA-SF1 | 2004 | 2006 | FLUXNET2015 |
| 22 | CA-SF2 | 2003 | 2005 | FLUXNET2015 |
| 23 | CA-SF3 | 2003 | 2005 | FLUXNET2015 |
| 24 | CH-Cha | 2006 | 2014 | FLUXNET2015 |
| 25 | CH-Dav | 1997 | 2014 | FLUXNET2015 |
| 26 | CH-Fru | 2007 | 2014 | FLUXNET2015 |
| 27 | CH-Oe1 | 2002 | 2008 | FLUXNET2015 |
| 28 | CN-Dan | 2004 | 2005 | FLUXNET2015 |
| 29 | CN-Din | 2003 | 2005 | FLUXNET2015 |
| 30 | CN-Du2 | 2007 | 2008 | FLUXNET2015 |
| 31 | CN-HaM | 2002 | 2003 | FLUXNET2015 |
| 32 | CN-Qia | 2003 | 2005 | FLUXNET2015 |
| 33 | DE-Bay | 1997 | 1999 | LaThuile |
| 34 | DE-Geb | 2001 | 2014 | FLUXNET2015 |
| 35 | DE-Gri | 2004 | 2014 | FLUXNET2015 |
| 36 | DE-Kli | 2005 | 2014 | FLUXNET2015 |
| 37 | DE-Meh | 2004 | 2006 | LaThuile |
| 38 | DE-Obe | 2008 | 2014 | FLUXNET2015 |
| 39 | DE-Seh | 2008 | 2010 | FLUXNET2015 |
| 40 | DE-SfN | 2013 | 2014 | FLUXNET2015 |
| 41 | DE-Tha | 1998 | 2014 | FLUXNET2015 |
| 42 | DE-Wet | 2002 | 2006 | LaThuile |
| 43 | DK-Lva | 2005 | 2006 | LaThuile |
| 44 | DK-Ris | 2004 | 2005 | LaThuile |
| 45 | DK-Sor | 1997 | 2014 | FLUXNET2015 |
| 46 | DK-ZaH | 2000 | 2013 | FLUXNET2015 |
| 47 | ES-ES1 | 1999 | 2006 | LaThuile |
| 48 | ES-ES2 | 2005 | 2006 | LaThuile |
| 49 | ES-LMa | 2004 | 2006 | LaThuile |
| 50 | FI-Lom | 2007 | 2009 | FLUXNET2015 |
| 51 | FR-Fon | 2005 | 2013 | FLUXNET2015 |
| 52 | FR-Gri | 2005 | 2013 | FLUXNET2015 |
| 53 | FR-LBr | 2003 | 2008 | FLUXNET2015 |
| 54 | GF-Guy | 2004 | 2014 | FLUXNET2015 |
| 55 | HU-Bug | 2003 | 2006 | LaThuile |
| 56 | IE-Dri | 2003 | 2005 | LaThuile |
| 57 | IT-Amp | 2003 | 2006 | LaThuile |
| 58 | IT-CA1 | 2012 | 2013 | FLUXNET2015 |
| 59 | IT-CA3 | 2012 | 2013 | FLUXNET2015 |
| 60 | IT-Col | 2007 | 2014 | FLUXNET2015 |
| 61 | IT-Cpz | 2001 | 2008 | FLUXNET2015 |
| 62 | IT-Isp | 2013 | 2014 | FLUXNET2015 |
| 63 | IT-Lav | 2005 | 2014 | FLUXNET2015 |
| 64 | IT-MBo | 2003 | 2012 | FLUXNET2015 |
| 65 | IT-PT1 | 2003 | 2004 | FLUXNET2015 |
| 66 | IT-Ren | 2010 | 2013 | FLUXNET2015 |
| 67 | IT-Ro1 | 2002 | 2006 | FLUXNET2015 |
| 68 | IT-Ro2 | 2002 | 2008 | FLUXNET2015 |
| 69 | JP-SMF | 2003 | 2006 | FLUXNET2015 |
| 70 | NL-Loo | 1997 | 2013 | FLUXNET2015 |
| 71 | PL-wet | 2004 | 2005 | LaThuile |
| 72 | PT-Esp | 2002 | 2004 | LaThuile |
| 73 | PT-Mi2 | 2005 | 2006 | LaThuile |
| 74 | RU-Fyo | 2003 | 2014 | FLUXNET2015 |
| 75 | SD-Dem | 2005 | 2009 | FLUXNET2015 |
| 76 | UK-Gri | 2000 | 2001 | LaThuile |
| 77 | UK-PL3 | 2005 | 2006 | LaThuile |
| 78 | US-AR1 | 2010 | 2012 | FLUXNET2015 |
| 79 | US-ARM | 2003 | 2012 | FLUXNET2015 |
| 80 | US-Aud | 2003 | 2005 | LaThuile |
| 81 | US-Bkg | 2005 | 2006 | LaThuile |
| 82 | US-Blo | 2000 | 2006 | FLUXNET2015 |
| 83 | US-Cop | 2002 | 2003 | FLUXNET2015 |
| 84 | US-FPe | 2000 | 2006 | LaThuile |
| 85 | US-MMS | 1999 | 2014 | FLUXNET2015 |
| 86 | US-Me2 | 2002 | 2014 | FLUXNET2015 |
| 87 | US-Myb | 2011 | 2014 | FLUXNET2015 |
| 88 | US-NR1 | 1999 | 2014 | FLUXNET2015 |
| 89 | US-Ne1 | 2002 | 2012 | FLUXNET2015 |
| 90 | US-Ne2 | 2002 | 2012 | FLUXNET2015 |
| 91 | US-Ne3 | 2002 | 2012 | FLUXNET2015 |
| 92 | US-SP2 | 2000 | 2004 | LaThuile |
| 93 | US-SP3 | 1999 | 2004 | LaThuile |
| 94 | US-SRG | 2009 | 2014 | FLUXNET2015 |
| 95 | US-SRM | 2004 | 2014 | FLUXNET2015 |
| 96 | US-Syv | 2002 | 2008 | FLUXNET2015 |
| 97 | US-Ton | 2001 | 2014 | FLUXNET2015 |
| 98 | US-Twt | 2010 | 2014 | FLUXNET2015 |
| 99 | US-UMB | 2000 | 2014 | FLUXNET2015 |
| 100 | US-WCr | 1999 | 2006 | FLUXNET2015 |
| 101 | US-Whs | 2008 | 2014 | FLUXNET2015 |
| 102 | US-Wkg | 2005 | 2014 | FLUXNET2015 |
| 103 | ZA-Kru | 2000 | 2002 | FLUXNET2015 |

**Table S5.** Trends of Interception Loss (I), Interception Ratio (I/P), Precipitation Sum, and Precipitation Intensity (PI) across Climate Zones (1982–2020).

| Climate Zones | I (mm/year) | I/P (%/year) | Precipitation Sum (mm /year) | PI (mm/day/year) |
| --- | --- | --- | --- | --- |
| Tropical | -0.2434 | 0.0033 | -0.321 | 0.002 |
| Arid | 0.0432 | 0.0113 | -0.2327 | 0.0005 |
| Temperate | 0.258 | 0.0297 | -0.5249 | 0.0012 |
| Cold | 0.0793 | 0.0097 | 0.5544 | 0.0014 |
| Polar | -0.0008 | 0.0021 | 0.1525 | 0.0002 |

**Table S6** Canopy interception loss rate observation.

| ID | Longitude | Latitude | Data Period | Species | P (mm) | I (mm) | I/P (%) | Author and Reference | Language |
| --- | --- | --- | --- | --- | --- | --- | --- | --- | --- |
| 1 | -16.4 | 28.45 | 1994.12.30-1995.12.31 | Broadleaf | -16.4 | 28.45 | -16.4 | Aboal et al. (1999)12 | English |
| 2 | -8.4167 | 52.1333 | 1989.1.1-1994.12.31 | Needleleaf | 6846 | 2982 | 43.56 | Aherne et al. (1999)13 | English |
| 3 | 51.62 | 36.58 | 2008.6.24-2008.12.5;  2009.5.5-2009.11.30 | Broadleaf | 1001.5 | 241.2 | 24.1 | Ahmadi et al. (2013)14 | English |
| 4 | 51.6167 | 36.5833 | 2008.6.24-2008.10.25 | Broadleaf | 309.9 | 92.2 | 32.1 | Ahmadi et al. (2009)15 | English |
| 5 | 112.37 | -1.29 | 1993.11.1-1994.4.14 | Broadleaf | 2199 | 251 | 11.4 | Asdak et al. (1998)16 | English |
| 6 | 112.37 | -1.29 | 1994.6.11-1995.7.2 | Broadleaf | 3563 | 219 | 6.2 | Asdak et al. (1998b)16 | English |
| 7 | 33.47 | 41.47 | 2012.1.1-2014.12.31 | Needleleaf | 1083.24 | 2426 | 22.4 | Aydin et al. (2018)17 | English |
| 8 | 9.59 | 46.24 | 1994.6.1-1999.5.31 | Needleleaf | 8441 | 1991 | 23.59 | Balestrini and Tagliaferri (2001)18 | English |
| 9 | 9.54 | 46.1 | 1994.6.1-1999.5.31 | Needleleaf | 7724 | 1726 | 22.35 | Balestrini and Tagliaferri (2001)18 | English |
| 10 | 118.61 | 44.21 | 2013.5.1-2013.10.31 | Broadleaf | 355.1 | 77 | 21.68 | Bao et al. (2016) 19 | Chinese |
| 11 | -78.5 | 44.08 | 2010.1.1-2010.12.31 | Needleleaf | 325.33 | 88.67 | 27.5 | Bialkowski and Buttle (2015)20 | English |
| 12 | -78.5 | 44.08 | 2009.1.1-2009.12.31 | Needleleaf | 351.33 | 68.67 | 20.07 | Bialkowski and Buttle (2015)20 | English |
| 13 | -84.01 | 10.43 | 1995.5.1-1995.12.31 | Broadleaf | 2122 | 177 | 8.34 | Bigelow (2001)21 | English |
| 14 | -84.01 | 10.43 | 1994.12.1-1995.4.30 | Broadleaf | 1035 | 197 | 6.35 | Bigelow (2001)21 | English |
| 15 | -83.9167 | 35.45 | 2012.12.1-2014.11.30 | Broadleaf | 1817 | 367.034 | 20.2 | Brantley et al. (2019)22 | English |
| 16 | -83.7167 | 35.1 | 2012.12.1-2014.11.30 | Broadleaf | 1795 | 231.555 | 12.9 | Brantley et al. (2019)22 | English |
| 17 | -83.7333 | 35.1167 | 2012.12.1-2014.11.30 | Broadleaf | 1846 | 180.908 | 9.8 | Brantley et al. (2019)22 | English |
| 18 | -83.64 | 35.1667 | 2012.12.1-2014.11.30 | Broadleaf | 2060 | 74.16 | 3.6 | Brantley et al. (2019)22 | English |
| 19 | -83.8333 | 35.3 | 2012.12.1-2014.11.30 | Broadleaf | 1858 | 29.728 | 1.6 | Brantley et al. (2019)22 | English |
| 20 | -39.26 | -6.39 | 2010.1.1-2017.12.31 | Broadleaf | 4776.2 | 699.4 | 14.6 | Brasil et al. (2018)23 | English |
| 21 | -115.46 | 56.07 | 2005.7.6-2005.10.18 | Broadleaf | 181 | 27 | 14.92 | Brown et al. (2014)24 | English |
| 22 | -115.46 | 56.07 | 2006.5.2-2006.10.9 | Broadleaf | 331 | 40 | 12.08 | Brown et al. (2014)24 | English |
| 23 | -84.82 | 32.38 | 2001.4.4-2002.6.11 | Needleleaf | 738.8 | 147.65 | 20 | Bryant et al. (2005)25 | English |
| 24 | -84.82 | 32.38 | 2001.4.4-2002.6.11 | Mixed | 684.9 | 127.39 | 18.6 | Bryant et al. (2005)25 | English |
| 25 | -84.82 | 32.38 | 2001.4.4-2002.6.11 | Broadleaf | 738.8 | 129.69 | 17.55 | Bryant et al. (2005)25 | English |
| 26 | 30.65 | -29.19 | 2008.4.1-2011.3.31 | Needleleaf | 1909.7 | 408.7 | 21.4 | Bulcock and Jewitt (2012)26 | English |
| 27 | 30.65 | -29.21 | 2008.4.1-2011.3.31 | Broadleaf | 1884.7 | 401.2 | 21.3 | Bulcock and Jewitt (2012)26 | English |
| 28 | -78.5 | 44.08 | 2010.5.4-2010.10.27 | Needleleaf | 701.88 | 114.33 | 16.27 | Buttle and Farnsworth (2012)27 | English |
| 29 | -78.5 | 44.08 | 2009.5.11-2009.10.22 | Needleleaf | 679.02 | 108.52 | 16.015 | Buttle and Farnsworth (2012)27 | English |
| 30 | -78.5 | 44.08 | 2010.5.4-2010.10.27 | Mixed | 727 | 215.3 | 29.61 | Buttle and Farnsworth (2012)27 | English |
| 31 | -78.5 | 44.08 | 2009.5.11-2009.10.22 | Mixed | 647.3 | 156.8 | 24.22 | Buttle and Farnsworth (2012)27 | English |
| 32 | -78.5 | 44.08 | 2010.5.4-2010.10.27 | Broadleaf | 714.4 | 128.6 | 18 | Buttle and Farnsworth (2012)27 | English |
| 33 | -78.5 | 44.08 | 2009.5.11-2009.10.22 | Broadleaf | 680.95 | 115.9 | 17.15 | Buttle and Farnsworth (2012)27 | English |
| 34 | 128.87 | 47.18 | 2005.5.1-2005.9.30 | Needleleaf | 503.23 | 98.68 | 19.61 | Cai et al. (2006)28 | Chinese |
| 35 | 128.87 | 47.18 | 2005.5.1-2005.9.30 | Broadleaf | 503.23 | 75.35 | 14.97 | Cai et al. (2006)28 | Chinese |
| 36 | 106.24 | 35.51 | 2012.5.1-2012.10.31 | Needleleaf | 507.2 | 146.8 | 28.9 | Cao (2014)29 | Chinese |
| 37 | 106.24 | 35.51 | 2012.5.1-2012.10.31 | Needleleaf | 507.2 | 146.37 | 28.84 | Cao (2014)29 | Chinese |
| 38 | 106.24 | 35.51 | 2012.5.1-2012.10.31 | Broadleaf | 507.2 | 118.6 | 23.4 | Cao (2014)29 | Chinese |
| 39 | 110.17 | 29.5 | 2005.5.1-2005.8.31 | Needleleaf | 888.7 | 220.6 | 24.82 | Cao et al. (2006)30 | Chinese |
| 40 | 106.33 | 35.47 | 2012.5.1-2012.10.31 | Needleleaf | 507.2 | 176.88 | 34.88 | Cao et al. (2018)31 | Chinese |
| 41 | 101.98 | 23.94 | 2016.5.1-2016.9.30;  2017.5.1-2017.9.30 | Broadleaf | 994.07 | 406.4 | 40.88 | Cao et al. (2018a)32 | Chinese |
| 42 | 75.099 | 54 | 1983.10.1-1984.9.30 | Needleleaf | 1032 | 251.195 | 25 | Cape et al. (1991)33 | English |
| 43 | 95.889 | 56 | 1984.4.1-1985.3.31 | Needleleaf | 544.5 | 108.915 | 21 | Cape et al. (1991)33 | English |
| 44 | 74.39 | 57 | 1984.4.1-1985.3.31 | Needleleaf | 799.67 | 112.84 | 14.33 | Cape et al. (1991)33 | English |
| 45 | 75.099 | 54 | 1983.10.1-1984.9.30 | Broadleaf | 1148 | 206.56 | 18 | Cape et al. (1991)33 | English |
| 46 | 75.099 | 54 | 1983.10.1-1984.9.30 | Needleleaf | 947 | 312.5 | 33 | Cape et al. (1991)33 | English |
| 47 | 75.099 | 54 | 1983.10.1-1984.9.30 | Needleleaf | 1117 | 189.89 | 17 | Cape et al. (1991)33 | English |
| 48 | 95.889 | 56 | 1984.4.1-1985.3.31 | Needleleaf | 454 | 122.58 | 27 | Cape et al. (1991)33 | English |
| 49 | 95.889 | 56 | 1984.4.1-1985.3.31 | Needleleaf | 635 | 95.25 | 15 | Cape et al. (1991)33 | English |
| 50 | 74.39 | 57 | 1984.4.1-1985.3.31 | Needleleaf | 793 | 103.09 | 13 | Cape et al. (1991)33 | English |
| 51 | 74.39 | 57 | 1984.4.1-1985.3.31 | Needleleaf | 894 | 107.28 | 12 | Cape et al. (1991)33 | English |
| 52 | 74.39 | 57 | 1984.4.1-1985.3.31 | Needleleaf | 712 | 128.16 | 18 | Cape et al. (1991)33 | English |
| 53 | 75.099 | 54 | 1983.10.1-1984.9.30 | Broadleaf | 1156 | 196.52 | 17 | Cape et al. (1991)33 | English |
| 54 | 75.099 | 54 | 1983.10.1-1984.9.30 | Broadleaf | 1140 | 216.6 | 19 | Cape et al. (1991)33 | English |
| 55 | -79.65 | 43.55 | 1995.5.15-1995.9.27 | Broadleaf | 213.8 | 41.2 | 19.27 | Carlyle-Moses and Price (1999)34 | English |
| 56 | -99.87 | 24.71 | 1999.1.1-2001.7.13 | Broadleaf | 691.8 | 109.3 | 15.8 | Carlyle-Moses and Price (2007)35 | English |
| 57 | -79.58 | 9.17 | 2006.7.23-2006.9.20 | Broadleaf | 349.7 | 49.56 | 14.174 | Carlyle-Moses et al. (2010)36 | English |
| 58 | -99.86 | 24.7 | 1999.5.1-1999.10.31;  2000.5.1-2000.10.31;  2001.5.1-2001.7.31 | shrubs | 394 | 32.3 | 8.2 | Carlyle-Moses (2004)37 | English |
| 59 | 11.58 | 43.71 | 1994.1.1-1994.12.31 | Needleleaf | 1075 | 262.3 | 24.4 | Certini et al. (1998)38 | English |
| 60 | 11.58 | 43.71 | 1994.1.1-1994.12.31 | Broadleaf | 1076 | 271.85 | 25.3 | Certini et al. (1998)38 | English |
| 61 | 128.87 | 47.18 | 2010.7.1-2010.10.31;  2011.5.1-2011.10.31 | Needleleaf | 514.1 | 132.43 | 25.76 | Chai et al. (2013)39 | Chinese |
| 62 | 103.89 | 31.69 | 2006.10.1-2006.10.31 | Shrubs | 88.66 | 32.46 | 36.61 | Chang (2007)40 | Chinese |
| 63 | 103.89 | 31.69 | 2006.9.1-2006.9.30 | Shrubs | 92.99 | 33.1 | 35.6 | Chang (2007)40 | Chinese |
| 64 | 103.89 | 31.69 | 2006.7.1-2006.10.31 | Shrubs | 259.49 | 86.2 | 31.17 | Chang (2007)40 | Chinese |
| 65 | 103.89 | 31.69 | 2006.8.1-2006.8.31 | Shrubs | 28.54 | 7.69 | 26.94 | Chang (2007)40 | Chinese |
| 66 | 103.89 | 31.69 | 2006.7.1-2006.7.31 | Shrubs | 49.3 | 12.95 | 25.54 | Chang (2007)40 | Chinese |
| 67 | 103.89 | 31.69 | 2005.10.1-2005.10.31 | Shrubs | 54.5 | 8.3 | 15.23 | Chang (2007)40 | Chinese |
| 68 | 103.89 | 31.69 | 2005.8.1-2005.10.31 | Shrubs | 166.73 | 18.97 | 11.64 | Chang (2007)40 | Chinese |
| 69 | 103.89 | 31.69 | 2005.8.1-2005.8.31 | Shrubs | 21.62 | 2.25 | 10.41 | Chang (2007)40 | Chinese |
| 70 | 103.89 | 31.69 | 2005.9.1-2005.9.30 | Shrubs | 90.79 | 8.42 | 9.27 | Chang (2007)40 | Chinese |
| 71 | 103.89 | 31.69 | 2005.10.1-2005.10.31 | Needleleaf | 54.5 | 30.69 | 56.31 | Chang (2007)40 | Chinese |
| 72 | 103.89 | 31.69 | 2005.8.1-2005.8.31 | Needleleaf | 21.62 | 11.71 | 54.16 | Chang (2007)40 | Chinese |
| 73 | 103.89 | 31.69 | 2005.8.1-2005.10.31 | Needleleaf | 166.73 | 83.32 | 51.85 | Chang (2007)40 | Chinese |
| 74 | 103.89 | 31.69 | 2006.8.1-2006.8.31 | Needleleaf | 28.54 | 13.15 | 46.08 | Chang (2007)40 | Chinese |
| 75 | 103.89 | 31.69 | 2006.9.1-2006.9.30 | Needleleaf | 92.99 | 42.49 | 45.69 | Chang (2007)40 | Chinese |
| 76 | 103.89 | 31.69 | 2005.9.1-2005.9.30 | Needleleaf | 90.79 | 41.13 | 45.3 | Chang (2007)40 | Chinese |
| 77 | 103.89 | 31.69 | 2006.7.1-2006.7.31 | Needleleaf | 49.3 | 21.61 | 43.83 | Chang (2007)40 | Chinese |
| 78 | 103.89 | 31.69 | 2006.7.1-2006.10.31 | Needleleaf | 259.49 | 111.14 | 43.46 | Chang (2007)40 | Chinese |
| 79 | 103.89 | 31.69 | 2006.10.1-2006.10.31 | Needleleaf | 88.66 | 33.89 | 38.22 | Chang (2007)40 | Chinese |
| 80 | 120.89 | 23.93 | 2008.5.1-2009.4.30 | Broadleaf | 917.6 | 106.06 | 11.56 | Chen and Li (2016)41 | Chinese |
| 81 | 108.33 | 33.3 | 2006.5.1-2006.10.31;  2007.5.1-2007.10.31;  2008.5.1-2008.10.31 | Needleleaf | 1576.4 | 524 | 33.24 | Chen et al. (2012)42 | Chinese |
| 82 | 116.47 | 39.9 | 2010.6.1-2010.9.30 | Needleleaf | 298.68 | 92.13 | 30.85 | Chen et al. (2013)43 | Chinese |
| 83 | 116.47 | 39.9 | 2010.6.1-2010.9.30 | Broadleaf | 298.68 | 95.92 | 32.12 | Chen et al. (2013)43 | Chinese |
| 84 | 108.33 | 33.3 | 2006.6.1-2008.10.31 | Needleleaf | 1578.31 | 524 | 33.2 | Chen et al. (2013b)44 | English |
| 85 | 109.53 | 36.42 | 2016.7.1-2016.10.31 | Broadleaf | 266 | 43.6 | 16.39 | Cheng (2020)45 | Chinese |
| 86 | 109.53 | 36.42 | 2017.7.1-2017.10.31 | Broadleaf | 512.2 | 76.55 | 14.95 | Cheng (2020)45 | Chinese |
| 87 | -60.2 | -2.61 | 2002.11.1-2003.10.31 | Broadleaf | 2025.2 | 457.7 | 22.6 | Cuartas et al. (2007)46 | English |
| 88 | -60.2 | -2.61 | 2003.11.1-2004.10.31 | Broadleaf | 2804 | 372.93 | 13.3 | Cuartas et al. (2007)46 | English |
| 89 | -54.92 | -2.89 | 2001.4.1-2003.7.31 | Broadleaf |  |  | 11.6 | Czikowsky and Fitzjarrald (2009)47 | English |
| 90 | -8.02 | 38.53 | 1996.10.1-1998.9.30 | Broadleaf | 1736.4 | 146.8 | 8.5 | David et al. (2006)48 | English |
| 91 | -2.63 | 51.45 | 1998.7.1-1998.7.10 | Broadleaf | 31.13 | 6.92 | 22.23 | Davie and Durocher (1997)49 | English |
| 92 | -1.87 | 6.67 | 2007.1.1-2008.12.31 | Broadleaf | 1376 | 200.34 | 14.56 | Dawoe et al. (2018)50 | English |
| 93 | -38.53 | -8.31 | 2016.3.1-2017.9.30 | Shrubs |  |  | 10.3 | de Queiroz et al. (2020)51 | English |
| 94 | 137.18 | 35.03 | 2000.4.1-2002.12.31 | Broadleaf | 3857.2 | 648.9 | 16.8 | Deguchi et al. (2006)52 | English |
| 95 | 110.25 | 25.17 | 2015.5.1-2016.4.30 | Broadleaf | 3132 | 1169.97 | 37.48 | Deng et al. (2018)53 | Chinese |
| 96 | 123.65 | 42.55 | 2019.6.1-2019.9.30 | Needleleaf | 260.5 | 84.3 | 32.36 | Deng et al. (2022)54 | English |
| 97 | 120.04 | -1.5 | 2004.4.5-2005.4.4 | Broadleaf | 1828 | 396.68 | 21.7 | Dietz et al. (2006)55 | English |
| 98 | 4.63 | 52.55 | 1983.1.1-1985.12.31 | Broadleaf | 952.1 | 246.9 | 25.93 | Dolman (1987)56 | English |
| 99 | -2.4 | 37.2 | 1988.9.1-1989.8.31 | Needleleaf | 650 | 97.5 | 15 | Domingo et al. (1994)57 | English |
| 100 | -2.37 | 37.13 | 1994.4.15-1994.5.31 | Shrubs | 92 | 27.6 | 30 | Domingo et al. (1998)58 | English |
| 101 | 118.49 | 41.18 | 2013.5.1-2013.9.30;  2014.5.1-2014.9.30 | Needleleaf | 857.4 | 164.5 | 19.15 | Dong et al. (2018)59 | Chinese |
| 102 | 118.49 | 41.18 | 2013.5.1-2013.9.30;  2014.5.1-2014.9.30 | Broadleaf | 857.4 | 106.6 | 12.4 | Dong et al. (2018)59 | Chinese |
| 103 | 118.52 | 41.31 | 2013.5.1-2013.9.30;  2014.5.1-2014.9.30 | Needleleaf | 857.4 | 222.93 | 26 | Dong et al. (2020)60 | English |
| 104 | 106.33 | 35.47 | 2005.5.1-2005.5.31;  2006.5.1-2006.5.31;  2007.5.1-2007.5.31;  2008.5.1-2008.5.31 | Needleleaf | 67 | 15.9 | 23.73 | Du (2009)61 | Chinese |
| 105 | 106.33 | 35.47 | 2005.8.1-2005.8.31;  2006.8.1-2006.8.31;  2007.8.1-2007.8.31;  2008.8.1-2008.8.31 | Needleleaf | 241.8 | 50.8 | 21 | Du (2009)61 | Chinese |
| 106 | 106.33 | 35.47 | 2005.7.1-2005.7.31;  2006.7.1-2006.7.31;  2007.7.1-2007.7.31;  2008.7.1-2008.7.31 | Needleleaf | 315.5 | 65.9 | 20.89 | Du (2009)61 | Chinese |
| 107 | 106.33 | 35.47 | 2005.6.1-2005.6.30;  2006.6.1-2006.6.30;  2007.6.1-2007.6.30;  2008.6.1-2008.6.30 | Needleleaf | 154.6 | 29.5 | 19.06 | Du (2009)61 | Chinese |
| 108 | 106.33 | 35.47 | 2005.10.1-2005.10.31;  2006.10.1-2006.10.31;  2007.10.1-2007.10.31;  2008.10.1-2008.10.31 | Needleleaf | 172.8 | 31.9 | 18.44 | Du (2009)61 | Chinese |
| 109 | 106.33 | 35.47 | 2005.9.1-2005.9.30;  2006.9.1-2006.9.30;  2007.9.1-2007.9.30;  2008.9.1-2008.9.30 | Needleleaf | 201.5 | 36.5 | 18.12 | Du (2009)61 | Chinese |
| 110 | 106.33 | 35.47 | 2009.5.1-2009.10.31 | Needleleaf | 727.5 | 123.9 | 17.03 | Duan et al. (2010)62 | Chinese |
| 111 | 106.33 | 35.47 | 2009.5.1-2009.10.31 | Broadleaf | 727.5 | 100.1 | 13.76 | Duan et al. (2010)62 | Chinese |
| 112 | 150.24 | -35.6 | 1982.3.1-1983.2.28 | Broadleaf | 591 | 90 | 15 | Dunin et al. (1988)63 | English |
| 113 | 150.24 | -35.6 | 1983.3.1-1984.2.29 | Broadleaf | 1351 | 205 | 13 | Dunin et al. (1988) 63 | English |
| 114 | 150.24 | -35.6 | 1984.3.1-1985.2.28 | Broadleaf | 1203 | 115 | 10 | Dunin et al. (1988) 63 | English |
| 115 | 79.82 | 44.16 | 2012.5.1-2012.9.20 | Mixed | 435.4 | 127.7 | 29.3 | Duval. (2019)64 | English |
| 116 | 115.17 | 4.53 | 1991.11.1-1992.2.29 | Broadleaf | 826.1 | 149.1 | 18.04 | Dykes (1997)65 | English |
| 117 | 113.87 | 24.66 | 2015.4.1-2015.10.31 | Shrubs | 1385.27 | 102.57 | 7.4 | Fan (2016)66 | Chinese |
| 118 | 113.87 | 24.66 | 2015.4.1-2015.10.31 | Grassland | 1385.27 | 359.56 | 25.96 | Fan (2016)66 | Chinese |
| 119 | 113.87 | 24.66 | 2015.4.1-2015.10.31 | Broadleaf | 1385.27 | 155.18 | 11.2 | Fan (2016)66 | Chinese |
| 120 | 153.14 | -26.98 | 2012.5.1-2013.4.30 | Needleleaf | 1492.1 | 342.8 | 22.9 | Fan et al. (2014)67 | English |
| 121 | 153.14 | -26.98 | 2012.5.1-2013.4.30 | Broadleaf | 1492.1 | 219.7 | 16.4 | Fan et al. (2014)67 | English |
| 122 | 94.02 | 29.14 | 2007.10.1-2007.10.31 | Needleleaf | 32.9 | 24.2 | 73.56 | Fang (2010)68 | Chinese |
| 123 | 94.02 | 29.14 | 2007.4.1-2007.4.30 | Needleleaf | 56.2 | 33.2 | 59.07 | Fang (2010)68 | Chinese |
| 124 | 94.02 | 29.14 | 2007.8.1-2007.8.31 | Needleleaf | 78.2 | 45.7 | 58.44 | Fang (2010)68 | Chinese |
| 125 | 94.02 | 29.14 | 2007.9.1-2007.9.30 | Needleleaf | 114.3 | 65.5 | 57.31 | Fang (2010)68 | Chinese |
| 126 | 94.02 | 29.14 | 2007.4.1-2007.10.31 | Needleleaf | 93.69 | 48.37 | 55.33 | Fang (2010)68 | Chinese |
| 127 | 94.02 | 29.14 | 2007.5.1-2007.5.31 | Needleleaf | 83.6 | 42.5 | 50.84 | Fang (2010)68 | Chinese |
| 128 | 94.02 | 29.14 | 2007.6.1-2007.6.30 | Needleleaf | 130.9 | 60.1 | 45.91 | Fang (2010)68 | Chinese |
| 129 | 94.02 | 29.14 | 2007.7.1-2007.7.31 | Needleleaf | 159.7 | 67.4 | 42.2 | Fang (2010)68 | Chinese |
| 130 | 104.65 | 35.58 | 2011.5.1-2011.9.30 | Shrubs | 350.24 | 87.03 | 23.15 | Fang (2016)69 | Chinese |
| 131 | 104.65 | 35.58 | 2011.5.1-2011.9.30;  2012.5.1-2012.9.30 | Needleleaf | 551.6 | 112.27 | 22.37 | Fang (2016)69 | Chinese |
| 132 | 46.43 | 33.62 | 2010.3.1-2011.3.31 | Broadleaf | 474.2 | 84.9 | 17.9 | Fathizadeh et al. (2013)70 | English |
| 133 | 46.37 | 33.7 | 2015.2.1-2016.2.29 | Broadleaf | 822.8 | 84.2 | 10.23 | Fathizadeh et al. (2017)71 | English |
| 134 | 126.62 | 45.72 | 2015.4.1-2015.10.31 | Broadleaf | 430.2 | 78.8 | 23.24 | Feng et al. (2017)72 | Chinese |
| 135 | -47.666 | -2.613 | 2012.7.1-2013.5.31 | Herbaceous plant | 1095 | 263 | 24 | Fernandes et al. (2017)73 | English |
| 136 | 37.99 | 6.02 | 2017.1.1-2017.12.31 | Broadleaf | 466.7 | 209.5 | 44.9 | Filho et al. (2018)74 | English |
| 137 | -0.353 | 51.81 | 1997.6.26-1998.1.19 | Herbaceous plant | 391 | 98 | 25.06 | Finch and Riche (2010)75 | English |
| 138 | -0.353 | 51.81 | 1998.6.12-1999.2.1 | Herbaceous plant | 643 | 155 | 24.11 | Finch and Riche (2010)75 | English |
| 139 | -79.2 | -4 | 1998.4.18-2002.4.24 | Broadleaf | 2469 | 968 | 39.21 | Fleischbein et al. (2005)76 | English |
| 140 | -0.08 | 44.08 | 1986.2.9-1987.1.3 | Needleleaf | 613 | 73 | 11.91 | Gash et al. (1995)77 | English |
| 141 | -76.67 | 35.8 | 2013.1.1-2013.12.31 | Needleleaf | 1270 | 218 | 17.17 | Gavazzi et al. (2016)78 | English |
| 142 | -76.67 | 35.8 | 2014.1.1-2014.12.31 | Needleleaf | 1070 | 175 | 16.36 | Gavazzi et al. (2016)78 | English |
| 143 | -76.67 | 35.8 | 2006.1.1-2006.12.31 | Needleleaf | 1425 | 209 | 14.67 | Gavazzi et al. (2016)78 | English |
| 144 | -76.67 | 35.8 | 2011.1.1-2011.12.31 | Needleleaf | 1307 | 188 | 14.38 | Gavazzi et al. (2016)78 | English |
| 145 | -76.67 | 35.8 | 2010.1.1-2010.12.31 | Needleleaf | 1422 | 197 | 13.85 | Gavazzi et al. (2016)78 | English |
| 146 | -76.67 | 35.8 | 2008.1.1-2008.12.31 | Needleleaf | 1016 | 125 | 12.3 | Gavazzi et al. (2016)78 | English |
| 147 | -76.67 | 35.8 | 2005.1.1-2014.12.31 | Needleleaf | 1227 | 148 | 12.06 | Gavazzi et al. (2016)78 | English |
| 148 | -76.67 | 35.8 | 2005.1.1-2005.12.31 | Needleleaf | 1206 | 144 | 11.94 | Gavazzi et al. (2016)78 | English |
| 149 | -76.67 | 35.8 | 2012.1.1-2012.12.31 | Needleleaf | 1328 | 128 | 9.64 | Gavazzi et al. (2016)78 | English |
| 150 | -76.67 | 35.8 | 2007.1.1-2007.12.31 | Needleleaf | 897 | 72 | 8.03 | Gavazzi et al. (2016)78 | English |
| 151 | -62.87 | -10.3 | 2004.8.23-2004.12.2;  2005.1.6-2005.4.15 | Broadleaf | 1309 | 134 | 10.24 | Germer et al. (2006) | English |
| 152 | 5.89 | 49.72 | 2004.1.1-2009.7.31 | Broadleaf |  |  | 31 | Gerrits et al. (2010)79 | English |
| 153 | 85.38 | 27.38 | 2011.6.20-2011.9.9 | Needleleaf | 878 | 145 | 16.5 | Ghimire et al. (2012)80 | English |
| 154 | 85.38 | 27.38 | 2011.6.20-2011.9.9 | Broadleaf | 709 | 159 | 22.4 | Ghimire et al. (2012)80 | English |
| 155 | 48.41 | -18.93 | 2014.10.1-2015.9.30 | Broadleaf | 1747 | 476 | 27.25 | Ghimire et al. (2017) | English |
| 156 | -75.35 | -10.53 | 2003.7.29-2004.8.10 | Broadleaf | 2487.5 | 433.3 | 18.6 | Gomez-Peralta et al. (2008)81 | English |
| 157 | 104.05 | 32.91 | 2002.7.15-2002.10.31 | Broadleaf | 221 | 41.78 | 18.9 | Gong et al.(2004)82 | Chinese |
| 158 | 104.05 | 32.91 | 2002.7.15-2002.10.31 | Needleleaf | 255.6 | 91.4 | 34.8 | Gong et al.(2005)83 | Chinese |
| 159 | 7.08 | 48.67 | 1996.5.2-1996.10.27 | Broadleaf | 466 | 122.09 | 26.8 | Granier et al. (2000)84 | Chinese |
| 160 | 7.08 | 48.67 | 1995.5.2-1995.10.27 | Broadleaf | 458 | 115.87 | 25.3 | Granier et al. (2000)84 | Chinese |
| 161 | 118.5 | 41.19 | 2013.5.1-2013.9.30 | Needleleaf | 508.8 | 136.76 | 26.88 | Guo.(2016)85 | Chinese |
| 162 | 118.5 | 41.19 | 2013.5.1-2013.9.30 | Broadleaf | 508.8 | 79.74 | 15.67 | Guo.(2016)85 | Chinese |
| 163 | 127.63 | 45.41 | 2007.6.1-2007.8.31 | Needleleaf | 218.2 | 40.04 | 18.35 | Han (2008)86 | Chinese |
| 164 | 127.63 | 45.41 | 2007.6.1-2007.8.31 | Mixed | 218.2 | 49.13 | 22.52 | Han (2008)86 | Chinese |
| 165 | 127.63 | 45.41 | 2007.6.1-2007.8.31 | Broadleaf | 218.2 | 50.49 | 23.14 | Han (2008)86 | Chinese |
| 166 | 122.37 | 42.72 | 2011.4.15-2011.10.20 | Needleleaf | 297.2 | 22.2 | 7.47 | Han et al. (2012)87 | Chinese |
| 167 | 122.37 | 42.72 | 2010.4.12-2010.10.20 | Needleleaf | 605.7 | 33.9 | 5.6 | Han et al. (2012)87 | Chinese |
| 168 | 118.85 | 31.62 | 2012.4.1-2012.9.30 | Needleleaf | 470.7 | 116.3 | 24.71 | Han et al. (2014)88 | Chinese |
| 169 | 106.72 | 35.94 | 2017.8.12-2017.9.8 | Broadleaf | 124.67 | 9.06 | 7.32 | Han et al. (2018)89 | Chinese |
| 170 | 106.72 | 35.94 | 2017.9.9-2017.9.28 | Broadleaf | 10.35 | 0.69 | 6.44 | Han et al. (2018)89 | Chinese |
| 171 | 106.72 | 35.94 | 2017.4.17-2017.6.6 | Broadleaf | 89.86 | 5.32 | 5.89 | Han et al. (2018)89 | Chinese |
| 172 | 106.72 | 35.94 | 2017.4.17-2017.10.26 | Broadleaf | 413.79 | 21.85 | 5.3 | Han et al. (2018)89 | Chinese |
| 173 | 106.72 | 35.94 | 2017.6.7-2017.7.6 | Broadleaf | 52.77 | 2.67 | 5.1 | Han et al. (2018)89 | Chinese |
| 174 | 106.72 | 35.94 | 2017.9.29-2017.10.26 | Broadleaf | 87.3 | 3.12 | 3.59 | Han et al. (2018)89 | Chinese |
| 175 | 106.72 | 35.94 | 2017.7.7-2017.8.11 | Broadleaf | 48.6 | 0.98 | 1.93 | Han et al. (2018)89 | Chinese |
| 176 | 127.63 | 45.41 | 2010.9.1-2010.9.30 | Needleleaf | 12.3 | 7.21 | 58.59 | Han(2012)90 | Chinese |
| 177 | 127.63 | 45.41 | 2011.9.1-2011.9.30 | Needleleaf | 9 | 5.22 | 58.03 | Han(2012)90 | Chinese |
| 178 | 127.63 | 45.41 | 2011.8.1-2011.8.31 | Needleleaf | 90.7 | 32.21 | 35.51 | Han(2012)90 | Chinese |
| 179 | 127.63 | 45.41 | 2011.5.1-2011.5.31 | Needleleaf | 74.1 | 23.47 | 31.67 | Han(2012)90 | Chinese |
| 180 | 127.63 | 45.41 | 2011.6.1-2011.6.30 | Needleleaf | 91.1 | 27.35 | 30.02 | Han(2012)90 | Chinese |
| 181 | 127.63 | 45.41 | 2010.7.1-2010.7.31 | Needleleaf | 84.6 | 23.35 | 27.6 | Han(2012)90 | Chinese |
| 182 | 127.63 | 45.41 | 2010.8.1-2010.8.31 | Needleleaf | 113.4 | 29.18 | 25.73 | Han(2012)90 | Chinese |
| 183 | 127.63 | 45.41 | 2011.7.1-2011.7.31 | Needleleaf | 244.6 | 53.08 | 21.67 | Han(2012)90 | Chinese |
| 184 | 127.63 | 45.41 | 2010.9.1-2010.9.30 | Mixed | 12.3 | 7.55 | 61.38 | Han(2012)90 | Chinese |
| 185 | 127.63 | 45.41 | 2011.5.1-2011.5.31 | Mixed | 74.1 | 22.29 | 30.08 | Han(2012)90 | Chinese |
| 186 | 127.63 | 45.41 | 2010.7.1-2010.7.31 | Mixed | 84.6 | 24.33 | 28.76 | Han(2012)90 | Chinese |
| 187 | 127.63 | 45.41 | 2011.8.1-2011.8.31 | Mixed | 90.7 | 25.87 | 28.52 | Han(2012)90 | Chinese |
| 188 | 127.63 | 45.41 | 2011.9.1-2011.9.30 | Mixed | 9 | 2.4 | 26.67 | Han(2012)90 | Chinese |
| 189 | 127.63 | 45.41 | 2011.6.1-2011.6.30 | Mixed | 91.1 | 23.91 | 26.25 | Han(2012)90 | Chinese |
| 190 | 127.63 | 45.41 | 2010.8.1-2010.8.31 | Mixed | 113.4 | 27.72 | 24.44 | Han(2012)90 | Chinese |
| 191 | 127.63 | 45.41 | 2011.7.1-2011.7.31 | Mixed | 244.6 | 36.25 | 14.82 | Han(2012)90 | Chinese |
| 192 | 127.63 | 45.41 | 2010.9.1-2010.9.30 | Broadleaf | 12.3 | 6.3 | 51.18 | Han(2012)90 | Chinese |
| 193 | 127.63 | 45.41 | 2011.9.1-2011.9.30 | Broadleaf | 9 | 2.65 | 29.44 | Han(2012)90 | Chinese |
| 194 | 127.63 | 45.41 | 2011.8.1-2011.8.31 | Broadleaf | 90.7 | 19.07 | 21.03 | Han(2012)90 | Chinese |
| 195 | 127.63 | 45.41 | 2010.7.1-2010.7.31 | Broadleaf | 85.6 | 16.7 | 19.74 | Han(2012)90 | Chinese |
| 196 | 127.63 | 45.41 | 2011.5.1-2011.5.31 | Broadleaf | 74.1 | 14.59 | 19.69 | Han(2012)90 | Chinese |
| 197 | 127.63 | 45.41 | 2010.8.1-2010.8.31 | Broadleaf | 113.4 | 18.69 | 16.48 | Han(2012)90 | Chinese |
| 198 | 127.63 | 45.41 | 2011.6.1-2011.6.30 | Broadleaf | 91.1 | 14.47 | 15.88 | Han(2012)90 | Chinese |
| 199 | 127.63 | 45.41 | 2011.7.1-2011.7.31 | Broadleaf | 244.6 | 25.84 | 10.57 | Han(2012)90 | Chinese |
| 200 | -6.13 | 41.12 | 2011.10.1-2012.9.30 | Broadleaf | 335 | 111.5 | 33.25 | Hassan et al. (2017)91 | English |
| 201 | -6.13 | 41.12 | 2012.10.1-2013.9.30 | Broadleaf | 672 | 186.5 | 27.75 | Hassan et al. (2017)91 | English |
| 202 | 102.87 | 30.75 | 2005.4.1-2005.10.31 | Needleleaf | 718.5 | 355.1 | 49.4 | He (2009)92 | Chinese |
| 203 | 102.87 | 30.75 | 2007.6.1-2007.9.30 | Broadleaf | 486.7 | 80.2 | 16.5 | He (2009)92 | Chinese |
| 204 | 112.83 | 27.97 | 2011.1.1-2011.1.31 | Broadleaf | 24.6 | 9.1 | 36.99 | He (2011)93 | Chinese |
| 205 | 112.83 | 27.97 | 2010.12.1-2010.12.31 | Broadleaf | 85.4 | 27.4 | 32.08 | He (2011)93 | Chinese |
| 206 | 112.83 | 27.97 | 2010.11.1-2010.11.30 | Broadleaf | 50.3 | 14.1 | 28.03 | He (2011)93 | Chinese |
| 207 | 112.83 | 27.97 | 2010.10.1-2010.10.31 | Broadleaf | 54.8 | 13.1 | 23.91 | He (2011)93 | Chinese |
| 208 | 112.83 | 27.97 | 2010.9.1-2010.9.30 | Broadleaf | 149.6 | 31.8 | 21.26 | He (2011)93 | Chinese |
| 209 | 112.83 | 27.97 | 2010.8.1-2010.8.31 | Broadleaf | 159.5 | 29.5 | 18.5 | He (2011)93 | Chinese |
| 210 | 112.83 | 27.97 | 2011.2.1-2011.2.28 | Broadleaf | 108.6 | 19.2 | 17.68 | He (2011)93 | Chinese |
| 211 | 112.83 | 27.97 | 2010.7.1-2010.7.31 | Broadleaf | 136.5 | 22.9 | 16.78 | He (2011)93 | Chinese |
| 212 | 112.83 | 27.97 | 2010.6.1-2010.6.30 | Broadleaf | 213.6 | 31.6 | 14.79 | He (2011)93 | Chinese |
| 213 | 112.83 | 27.97 | 2011.3.1-2011.3.31 | Broadleaf | 119.3 | 17.6 | 14.75 | He (2011)93 | Chinese |
| 214 | 112.83 | 27.97 | 2010.5.1-2010.5.31 | Broadleaf | 257.9 | 26.6 | 10.31 | He (2011)93 | Chinese |
| 215 | 109.5 | 26.8 | 2005.5.1-2005.10.31;  2006.5.1-2006.10.31;  2007.5.1-2007.10.31 | Needleleaf | 627.87 | 139.23 | 22.17 | He et al. (2011)94 | Chinese |
| 216 | 112.5 | 23.18 | 2005.5.1-2005.10.31;  2006.5.1-2006.10.31;  2007.5.1-2007.10.31 | Needleleaf | 1216.27 | 187.76 | 15.44 | He et al. (2011)94 | Chinese |
| 217 | 115.43 | 39.97 | 2005.5.1-2005.10.31;  2006.5.1-2006.10.31;  2007.5.1-2007.10.31 | Needleleaf | 498.31 | 72.21 | 14.49 | He et al. (2011)94 | Chinese |
| 218 | 112.5 | 23.18 | 2005.5.1-2005.10.31;  2006.5.1-2006.10.31;  2007.5.1-2007.10.31 | Mixed | 1216.27 | 245.08 | 20.15 | He et al. (2011)94 | Chinese |
| 219 | 115.43 | 39.97 | 2005.5.1-2005.10.31;  2006.5.1-2006.10.31;  2007.5.1-2007.10.31 | Mixed | 498.31 | 94.91 | 19.05 | He et al. (2011)94 | Chinese |
| 220 | 128.47 | 42.4 | 2005.5.1-2005.10.31;  2006.5.1-2006.10.31;  2007.5.1-2007.10.31 | Broadleaf | 599.13 | 189.95 | 31.7 | He et al. (2011)94 | Chinese |
| 221 | 109.5 | 26.8 | 2005.5.1-2005.10.31;  2006.5.1-2006.10.31;  2007.5.1-2007.10.31 | Broadleaf | 627.87 | 129.97 | 20.7 | He et al. (2011)94 | Chinese |
| 222 | 112.5 | 23.18 | 2005.5.1-2005.10.31;  2006.5.1-2006.10.31;  2007.5.1-2007.10.31 | Broadleaf | 1216.27 | 236.9 | 19.48 | He et al. (2011)94 | Chinese |
| 223 | 100.28 | 38.4 | 2011.6.1-2012.10.31 | Needleleaf | 571.3 | 200.53 | 35.1 | He et al. (2014)95,96 | English |
| 224 | -1.7 | 51.6 | 2004.6.21-2004.9.30 | Broadleaf | 233.5 | 62.3 | 26.7 | Herbst et al. (2006)96 | English |
| 225 | -1.7 | 51.6 | 2004.10.1-2004.11.24 | Broadleaf | 163.1 | 38.35 | 23.5 | Herbst et al. (2006)96 | English |
| 226 | -1.7 | 51.6 | 2004.11.25-2005.1.9 | Broadleaf | 99.5 | 20.8 | 20.9 | Herbst et al. (2006)96 | English |
| 227 | -1.7 | 51.6 | 2005.1.10-2005.4.12 | Broadleaf | 94.9 | 16.2 | 17.05 | Herbst et al. (2006)96 | English |
| 228 | -1.27 | 51.45 | 2006.4.5-2006.9.7;  2006.9.16-2007.1.12;  2007.1.30-2007.4.25 | Broadleaf | 773.1 | 192.2 | 24.86 | Herbst et al. (2008)97 | English |
| 229 | -72.25 | 42.3 | 1993.1.1-1993.3.31 | Broadleaf | 332 | 25.56 | 7.7 | Herwitz and Levia.Jr. (1997)98 | English |
| 230 | -83.74 | 9.58 | 1999.9.1-2000.8.31 | Broadleaf | 2150 | 611 | 28 | Hölscher et al. (2004)99 | English |
| 231 | -94.04 | 19.49 | 2007.4.1-2008.4.1 | Broadleaf | 2868 | 499 | 17 | Holwerda et al. (2010)100 | English |
| 232 | -94.04 | 19.49 | 2006.9.1-2007.6.28 | Broadleaf | 1765 | 135 | 8 | Holwerda et al. (2010)100 | English |
| 233 | 10.25 | 54.1 | 1990.6.1-1991.12.31 | Broadleaf | 1068.3 | 116.3 | 10.8 | Hörmann et al. (1996)101 | English |
| 234 | 113.1 | 28.82 | 2008.5.15-2008.9.15 | Broadleaf | 472.86 | 107.78 | 22.79 | Hu et al. (2009)102 | Chinese |
| 235 | 126.62 | 45.71 | 2015.5.1-2015.10.31 | Broadleaf | 430.2 | 127.6 | 37.63 | Hu et al. (2018)103 | Chinese |
| 236 | 115.35 | 39.38 | 2005.6.1-2005.9.30;  2006.6.1-2006.9.30;  2007.6.1-2007.9.30;  2008.6.1-2008.9.30 | Needleleaf | 337.6 | 56.55 | 16.75 | Hu et.al (2010)104 | Chinese |
| 237 | 116.1 | 40.06 | 2009.1.1-2009.12.31 | Needleleaf | 490.8 | 94.06 | 19.165 | Huang (2012)105 | Chinese |
| 238 | 116.1 | 40.06 | 2007.1.1-2007.12.31 | Needleleaf | 483.9 | 91.52 | 18.915 | Huang (2012)105 | Chinese |
| 239 | 116.1 | 40.06 | 2011.1.1-2011.12.31 | Needleleaf | 699.1 | 130.01 | 18.595 | Huang (2012)105 | Chinese |
| 240 | 116.1 | 40.06 | 2010.1.1-2010.12.31 | Needleleaf | 595.4 | 109.1 | 18.32 | Huang (2012)105 | Chinese |
| 241 | 116.1 | 40.06 | 2008.1.1-2008.12.31 | Needleleaf | 628.3 | 110.37 | 17.565 | Huang (2012)105 | Chinese |
| 242 | 116.1 | 40.06 | 2009.1.1-2009.12.31 | Broadleaf | 490.8 | 83.31 | 16.975 | Huang (2012)105 | Chinese |
| 243 | 116.1 | 40.06 | 2007.1.1-2007.12.31 | Broadleaf | 483.9 | 81.145 | 16.77 | Huang (2012)105 | Chinese |
| 244 | 116.1 | 40.06 | 2011.1.1-2011.12.31 | Broadleaf | 699.1 | 115.13 | 16.47 | Huang (2012)105 | Chinese |
| 245 | 116.1 | 40.06 | 2010.1.1-2010.12.31 | Broadleaf | 595.4 | 92.83 | 16.225 | Huang (2012)105 | Chinese |
| 246 | 116.1 | 40.06 | 2008.1.1-2008.12.31 | Broadleaf | 628.3 | 100.97 | 16.075 | Huang (2012)105 | Chinese |
| 247 | 113.03 | 28.11 | 2009.9.1-2009.9.30 | Broadleaf | 1.3 | 1.3 | 100 | Huang (2012b)106 | Chinese |
| 248 | 113.03 | 28.11 | 2009.1.1-2009.1.31 | Broadleaf | 22.6 | 13.4 | 59.3 | Huang (2012b)106 | Chinese |
| 249 | 113.03 | 28.11 | 2009.8.1-2009.8.31 | Broadleaf | 23.2 | 13.4 | 57.8 | Huang (2012b)106 | Chinese |
| 250 | 113.03 | 28.11 | 2010.11.1-2010.11.30 | Broadleaf | 28.3 | 13.9 | 49.1 | Huang (2012b)106 | Chinese |
| 251 | 113.03 | 28.11 | 2009.11.1-2009.11.30 | Broadleaf | 37.7 | 14.7 | 39 | Huang (2012b)106 | Chinese |
| 252 | 113.03 | 28.11 | 2009.10.1-2009.10.31 | Broadleaf | 40.4 | 13.8 | 34.2 | Huang (2012b)106 | Chinese |
| 253 | 113.03 | 28.11 | 2010.1.1-2010.1.31 | Broadleaf | 43 | 14.6 | 34 | Huang (2012b)106 | Chinese |
| 254 | 113.03 | 28.11 | 2010.10.1-2010.10.31 | Broadleaf | 54.1 | 17.7 | 32.7 | Huang (2012b)106 | Chinese |
| 255 | 113.03 | 28.11 | 2010.1.1-2010.12.31 | Broadleaf | 1785.8 | 287.9 | 30.6 | Huang (2012b)106 | Chinese |
| 256 | 113.03 | 28.11 | 2009.4.1-2009.4.30 | Broadleaf | 124.4 | 34.3 | 27.6 | Huang (2012b)106 | Chinese |
| 257 | 113.03 | 28.11 | 2009.2.1-2009.2.28 | Broadleaf | 108.8 | 28.9 | 26.6 | Huang (2012b)106 | Chinese |
| 258 | 113.03 | 28.11 | 2009.6.1-2009.6.30 | Broadleaf | 127.4 | 28.9 | 22.7 | Huang (2012b)106 | Chinese |
| 259 | 113.03 | 28.11 | 2009.1.1-2009.12.31 | Broadleaf | 1127.5 | 259 | 21.3 | Huang (2012b)106 | Chinese |
| 260 | 113.03 | 28.11 | 2010.7.1-2010.7.31 | Broadleaf | 145.9 | 30.8 | 21.1 | Huang (2012b)106 | Chinese |
| 261 | 113.03 | 28.11 | 2009.12.1-2009.12.31 | Broadleaf | 84.8 | 17.4 | 20.5 | Huang (2012b)106 | Chinese |
| 262 | 113.03 | 28.11 | 2009.7.1-2009.7.31 | Broadleaf | 222.7 | 40.9 | 18.4 | Huang (2012b)106 | Chinese |
| 263 | 113.03 | 28.11 | 2009.5.1-2009.5.31 | Broadleaf | 175.8 | 31.6 | 18 | Huang (2012b)106 | Chinese |
| 264 | 113.03 | 28.11 | 2010.4.1-2010.4.30 | Broadleaf | 219.3 | 36.3 | 16.6 | Huang (2012b)106 | Chinese |
| 265 | 113.03 | 28.11 | 2010.3.1-2010.3.31 | Broadleaf | 153.1 | 24.4 | 15.9 | Huang (2012b)106 | Chinese |
| 266 | 113.03 | 28.11 | 2010.9.1-2010.9.30 | Broadleaf | 188.7 | 28.7 | 15.2 | Huang (2012b)106 | Chinese |
| 267 | 113.03 | 28.11 | 2010.12.1-2010.12.31 | Broadleaf | 128.1 | 19.4 | 15.1 | Huang (2012b)106 | Chinese |
| 268 | 113.03 | 28.11 | 2010.5.1-2010.5.31 | Broadleaf | 249 | 34.7 | 13.9 | Huang (2012b)106 | Chinese |
| 269 | 113.03 | 28.11 | 2009.3.1-2009.3.31 | Broadleaf | 158.4 | 20.4 | 12.9 | Huang (2012b)106 | Chinese |
| 270 | 113.03 | 28.11 | 2010.6.1-2010.6.30 | Broadleaf | 315.7 | 38.9 | 12.3 | Huang (2012b)106 | Chinese |
| 271 | 113.03 | 28.11 | 2010.2.1-2010.2.28 | Broadleaf | 47.6 | 5.4 | 11.3 | Huang (2012b)106 | Chinese |
| 272 | 113.03 | 28.11 | 2010.8.1-2010.8.31 | Broadleaf | 213 | 23 | 10.8 | Huang (2012b)106 | Chinese |
| 273 | 118.87 | 31.66 | 2008.6.1-2008.6.30 | Needleleaf | 124 | 29.18 | 23.5 | Huang et al. (2009)107 | Chinese |
| 274 | 118.87 | 31.66 | 2008.8.1-2008.8.31 | Needleleaf | 142 | 27.45 | 19.33 | Huang et al. (2009)107 | Chinese |
| 275 | 118.87 | 31.66 | 2008.7.1-2008.7.31 | Needleleaf | 181 | 32.76 | 18.1 | Huang et al. (2009)107 | Chinese |
| 276 | 118.87 | 31.66 | 2008.6.1-2008.6.30 | Broadleaf | 124 | 44.27 | 35.7 | Huang et al. (2009)107 | Chinese |
| 277 | 118.87 | 31.66 | 2008.8.1-2008.8.31 | Broadleaf | 142 | 43.45 | 30.6 | Huang et al. (2009)107 | Chinese |
| 278 | 118.87 | 31.66 | 2008.7.1-2008.7.31 | Broadleaf | 181 | 34.75 | 19.2 | Huang et al. (2009)107 | Chinese |
| 279 | 101.63 | 37.31 | 2016.5.15-2016.8.18 | Broadleaf | 243.24 | 56.55 | 23.24 | Huang et al. (2018)108 | Chinese |
| 280 | -72.51 | -37.23 | 1998.4.1-1999.3.31 | Needleleaf | 1005 | 331.5 | 33 | Huber and Iroumé (2001)109 | English |
| 281 | -72.42 | -37.92 | 1996.4.1-1997.3.31 | Needleleaf | 1039 | 314 | 30.25 | Huber and Iroumé (2001)109 | English |
| 282 | -71.58 | -38.47 | 1998.4.1-1999.3.31 | Needleleaf | 1346 | 401 | 30 | Huber and Iroumé (2001)109 | English |
| 283 | -72.42 | -37.92 | 1998.4.1-1999.3.31 | Needleleaf | 734 | 212 | 29 | Huber and Iroumé (2001)109 | English |
| 284 | -72.43 | -37.3 | 1998.9.1-1999.8.31 | Needleleaf | 1038 | 286 | 27.5 | Huber and Iroumé (2001)109 | English |
| 285 | -72.42 | -37.92 | 1997.4.1-1998.3.31 | Needleleaf | 1858 | 507 | 27.3 | Huber and Iroumé (2001)109 | English |
| 286 | -73.23 | -39.8 | 1988.1.1-1988.12.31 | Needleleaf | 1364 | 303 | 22 | Huber and Iroumé (2001)109 | English |
| 287 | -73.23 | -39.8 | 1993.10.1-1994.9.30 | Needleleaf | 2075 | 384.3 | 18.3 | Huber and Iroumé (2001)109 | English |
| 288 | -72.75 | -37.5 | 1991.10.1-1992.9.30 | Needleleaf | 1971 | 362 | 18 | Huber and Iroumé (2001)109 | English |
| 289 | -73.23 | -39.8 | 1984.1.1-1984.12.31 | Needleleaf | 2059 | 346 | 17 | Huber and Iroumé (2001)109 | English |
| 290 | -73.23 | -39.8 | 1985.1.1-1985.12.31 | Needleleaf | 2295 | 391 | 17 | Huber and Iroumé (2001)109 | English |
| 291 | -73.23 | -39.8 | 1986.1.1-1986.12.31 | Needleleaf | 2341 | 408 | 17 | Huber and Iroumé (2001)109 | English |
| 292 | -73.23 | -39.8 | 1992.10.1-1993.9.30 | Needleleaf | 2925 | 492.3 | 16.7 | Huber and Iroumé (2001)109 | English |
| 293 | -73.23 | -39.8 | 1994.10.1-1995.9.30 | Needleleaf | 2394 | 399.4 | 16.5 | Huber and Iroumé (2001)109 | English |
| 294 | -73.23 | -39.8 | 1987.1.1-1987.12.31 | Needleleaf | 1841 | 296 | 16 | Huber and Iroumé (2001)109 | English |
| 295 | -73.23 | -39.8 | 1996.10.1-1997.9.30 | Needleleaf | 2574 | 363.5 | 14.5 | Huber and Iroumé (2001)109 | English |
| 296 | -73.23 | -39.8 | 1997.10.1-1998.9.30 | Needleleaf | 1676 | 214.5 | 12.5 | Huber and Iroumé (2001)109 | English |
| 297 | -73.23 | -39.8 | 1983.1.1-1983.12.31 | Needleleaf | 1628 | 199 | 12 | Huber and Iroumé (2001)109 | English |
| 298 | -73.53 | -40.1 | 1982.6.1-1983.5.31 | Needleleaf | 4603 | 537 | 12 | Huber and Iroumé (2001)109 | English |
| 299 | -73.23 | -39.8 | 1982.1.1-1982.12.31 | Needleleaf | 2389 | 254 | 11 | Huber and Iroumé (2001)109 | English |
| 300 | -73.23 | -39.8 | 1986.1.1-1986.12.31 | Broadleaf | 2973 | 1097 | 37 | Huber and Iroumé (2001)109 | English |
| 301 | -73.23 | -39.8 | 1987.1.1-1987.12.31 | Broadleaf | 2268 | 835 | 37 | Huber and Iroumé (2001)109 | English |
| 302 | -73.23 | -39.8 | 1988.1.1-1988.12.31 | Broadleaf | 1538 | 564 | 37 | Huber and Iroumé (2001)109 | English |
| 303 | -73.23 | -39.8 | 1991.1.1-1991.12.31 | Broadleaf | 2355 | 843 | 36 | Huber and Iroumé (2001)109 | English |
| 304 | -73.23 | -39.8 | 1989.1.1-1989.12.31 | Broadleaf | 1643 | 550 | 34 | Huber and Iroumé (2001)109 | English |
| 305 | -72.42 | -37.92 | 1997.4.1-1998.3.31 | Broadleaf | 1858 | 572 | 31 | Huber and Iroumé (2001)109 | English |
| 306 | -72.42 | -37.92 | 1998.4.1-1999.3.31 | Broadleaf | 734 | 219 | 30 | Huber and Iroumé (2001)109 | English |
| 307 | -72.42 | -37.92 | 1996.4.1-1997.3.31 | Broadleaf | 1039 | 295.7 | 28.3 | Huber and Iroumé (2001)109 | English |
| 308 | -73.23 | -39.8 | 1990.1.1-1990.12.31 | Broadleaf | 2287 | 608 | 27 | Huber and Iroumé (2001)109 | English |
| 309 | -73.23 | -39.8 | 1994.3.1-1995.2.28 | Broadleaf | 2066 | 541 | 26 | Huber and Iroumé (2001)109 | English |
| 310 | -73.56 | -40.16 | 1982.6.1-1983.5.31 | Broadleaf | 3563 | 782 | 22 | Huber and Iroumé (2001)109 | English |
| 311 | -73.23 | -39.8 | 1993.3.1-1994.2.28 | Broadleaf | 2690 | 505 | 19 | Huber and Iroumé (2001)109 | English |
| 312 | 121.65 | 29.87 | 2009.3.1-2009.10.31 | Broadleaf | 1384 | 341.38 | 24.67 | Huitao et al. (2011)110 | English |
| 313 | 111.5 | 37.46 | 2004.9.1-2004.9.30 | Shrubs | 16.975 | 3.04 | 17.9 | Huo et al. (2005)111 | Chinese |
| 314 | 111.5 | 37.46 | 2004.8.1-2004.8.31 | Shrubs | 169.84 | 17.66 | 10.4 | Huo et al. (2005)111 | Chinese |
| 315 | 111.5 | 37.46 | 2004.7.1-2004.7.31 | Shrubs | 97.05 | 10.06 | 10.38 | Huo et al. (2005)111 | Chinese |
| 316 | -7.33 | 5.85 | 1987.8.4-1987.12.20 | Broadleaf | 1021.9 | 94 | 9.2 | Hutchings et al. (1988)112 | English |
| 317 | 140.18 | 36.17 | 2008.4.1-2008.11.30;  2009.4.1-2009.11.30;  2010.4.1-2010.11.30 | Needleleaf | 774.8 | 154.1 | 19.9 | Iida et al. (2017)113 | English |
| 318 | 140.18 | 36.16 | 2008.1.1-2010.12.31 | Needleleaf | 774.8 | 154.1 | 19.9 | Iida et al. (2017)114 | English |
| 319 | 130.53 | 33.63 | 2017.4.1-2017.10.31 | Needleleaf | 1068.4 | 317.45 | 29.71 | Jeong et al. (2022)115 | English |
| 320 | 130.52 | 33.63 | 2016.5.24-2017.5.23 | Needleleaf | 2248.6 | 754.9 | 33.6 | Jeong et al. (2019)116 | English |
| 321 | 130.52 | 33.63 | 2017.4.1-2017.10.31 | Needleleaf | 1076.9 | 270.3 | 25.1 | Jeong et al. (2019b)117 | English |
| 322 | -58.15 | 6.83 | 1991.10.1-1991.12.1;  1991.12.12-1993.2.14 | Mixed | 2259 | 361 | 15.98 | Jetten (1996)118 | English |
| 323 | -58.15 | 6.83 | 1991.10.1-1991.12.1;  1991.12.12-1993.2.14 | Broadleaf | 2276 | 393 | 17.27 | Jetten (1996)118 | English |
| 324 | 128.87 | 47.18 | 2007.5.1-2007.9.30 | Needleleaf | 375.2 | 71.56 | 22 | Ji and Cai (2015)119 | Chinese |
| 325 | 128.87 | 47.18 | 2006.5.1-2006.9.30 | Needleleaf | 453.3 | 106.28 | 21.12 | Ji and Cai (2015)119 | Chinese |
| 326 | 104.38 | 35.35 | 2011.5.1-2011.10.31 | Shrubs | 208.9 | 48.35 | 23.15 | Jian et al. (2012)120 | English |
| 327 | 104.65 | 35.58333 | 2011.6.1-2011.10.31 | Shrubs | 226.1 | 23.4 | 10.35 | Jian et al. (2013)121 | English |
| 328 | 124.02 | 50.33 | 2007.5.1-2007.9.30 | Needleleaf | 236.62 | 79.2325 | 34.6525 | Jiang (2008)122 | Chinese |
| 329 | 124.02 | 50.33 | 2007.5.1-2007.9.30 | Broadleaf | 236.62 | 61.27 | 29.3 | Jiang (2008)122 | Chinese |
| 330 | 100.24 | 37.25 | 2014.1.1-2015.12.31 | Grassland | 498.79 | 58.44 | 29.4 | Jiang et al. (2020)123 | Chinese |
| 331 | -4.08 | 56.12 | 1983.1.1-1986.12.31 | Needleleaf | 5791 | 1632 | 28.1 | Johnson (1990)124 | English |
| 332 | -44.93 | -21.23 | 2012.9.1-2015.3.15 | Broadleaf | 3225 | 389.2 | 12.07 | Junqueira Junior et al. (2019)125 | English |
| 333 | 78.87 | 30.35 | 2014.6.1-2015.10.31 | Broadleaf | 1153.1 | 141.83 | 12.3 | Kaushal et al. (2017)126 | English |
| 334 | 176.42 | -38.55 | 1986.11.1-1987.12.31 | Needleleaf | 1154 | 219.26 | 19 | Kelliher et al. (1992)127 | English |
| 335 | 14.52 | 46.07 | 2008.1.1-2013.12.31 | Needleleaf |  |  | 3.9 | Kermavnar and Vilhar (2017)128 | English |
| 336 | 14.52 | 46.07 | 2008.1.1-2013.12.31 | Mixed |  |  | 18 | Kermavnar and Vilhar (2017)128 | English |
| 337 | 14.52 | 46.07 | 2008.1.1-2013.12.31 | Broadleaf |  |  | 7.1 | Kermavnar and Vilhar (2017)128 | English |
| 338 | 73.1 | 20 | 1993.1.1-1996.12.31 | Arbor | 423 | 92.02 | 21.77 | Khan et al. (1999)129 | English |
| 339 | 73.1 | 20 | 1993.1.1-1996.12.31 | Arbor | 423 | 53.81 | 12.72 | Khan et al. (1999)129 | English |
| 340 | -75.83 | 39.7 | 2004.12.1-2005.4.30 | Broadleaf | 329 | 19 | 5.78 | Klingaman et al. (2007)130 | English |
| 341 | 140.1 | 35.2 | 1995.9.1-1996.8.31 | Needleleaf | 2156.4 | 258.9 | 12 | Koichiro et al. (2001)131 | English |
| 342 | 140.1 | 35.2 | 1996.9.1-1997.8.31 | Needleleaf | 1862.9 | 270.2 | 14 | Koichiro et al. (2001)131 | English |
| 343 | 127.63 | 45.41 | 2008.6.1-2008.6.30 | Broadleaf | 40.2 | 9.53 | 23.70646766 | Kong (2009)132 | Chinese |
| 344 | 127.63 | 45.41 | 2008.7.1-2008.7.31 | Broadleaf | 169.3 | 30.5075 | 18.01978736 | Kong (2009)132 | Chinese |
| 345 | 127.63 | 45.41 | 2008.8.1-2008.8.31 | Broadleaf | 71.4 | 11.725 | 16.42156863 | Kong (2009)132 | Chinese |
| 346 | 127.63 | 45.41 | 2008.9.1-2008.9.30 | Broadleaf | 68.9 | 5.5075 | 7.993468795 | Kong (2009)132 | Chinese |
| 347 | 10.39 | 51.1 | 2006.5.1-2007.8.31 | Broadleaf |  |  | 30.8 | Krämer and Hölscher (2009)133 | English |
| 348 | 109.9 | 21.08 | 1999.10.1-2000.9.30 | Broadleaf | 1555 | 310 | 19.94 | Lane et al. (2008)134 | English |
| 349 | 109.9 | 21.08 | 2000.10.1-2001.9.30 | Broadleaf | 2226 | 437 | 19.63 | Lane et al. (2008)134 | English |
| 350 | 109.87 | 20.9 | 2000.10.1-2001.9.30 | Broadleaf | 1918 | 311 | 16.21 | Lane et al. (2008)134 | English |
| 351 | 109.87 | 20.9 | 1999.10.1-2000.9.30 | Broadleaf | 1525 | 247 | 16.2 | Lane et al. (2008)134 | English |
| 352 | -0.08 | 44.08 | 1986.2.8-1986.12.31 | Needleleaf | 369.9 | 46.3 | 12.52 | Lankreijer et al. (1993)135 | English |
| 353 | 5.75 | 52.04 | 1988.7.1-1989.9.30 | Broadleaf | 310.9 | 60.8 | 19.56 | Lankreijer et al. (1993)135 | English |
| 354 | 17.48 | 60.08 | 1995.5.22-1995.10.30 | Needleleaf | 179 | 46 | 25.7 | Lankreijer et al. (1999)136 | English |
| 355 | 106.87 | 22.04 | 2017.2.1-2017.2.28 | Broadleaf | 25.1 | 20 | 79.7 | Lei et al. (2020)137 | English |
| 356 | 106.87 | 22.04 | 2017.6.1-2017.6.30 | Broadleaf | 109.5 | 87.2 | 79.7 | Lei et al. (2020)137 | English |
| 357 | 106.87 | 22.04 | 2017.7.1-2017.7.31 | Broadleaf | 103.1 | 81.6 | 79.2 | Lei et al. (2020)137 | English |
| 358 | 106.87 | 22.04 | 2017.5.1-2017.5.31 | Broadleaf | 118 | 83.7 | 70.9 | Lei et al. (2020)137 | English |
| 359 | 106.87 | 22.04 | 2017.8.1-2017.8.31 | Broadleaf | 131.5 | 83.1 | 63.2 | Lei et al. (2020)137 | English |
| 360 | 106.87 | 22.04 | 2017.9.1-2017.9.30 | Broadleaf | 104.6 | 58.2 | 55.6 | Lei et al. (2020)137 | English |
| 361 | 106.87 | 22.04 | 2017.1.1-2017.12.31 | Broadleaf | 945.9 | 526 | 55.6 | Lei et al. (2020)137 | English |
| 362 | 106.87 | 22.04 | 2017.4.1-2017.4.30 | Broadleaf | 9 | 4.6 | 51.1 | Lei et al. (2020)137 | English |
| 363 | 106.87 | 22.04 | 2017.11.1-2017.11.30 | Broadleaf | 33.2 | 15.5 | 46.7 | Lei et al. (2020)137 | English |
| 364 | 106.87 | 22.04 | 2017.3.1-2017.3.31 | Broadleaf | 79.4 | 33.7 | 42.3 | Lei et al. (2020)137 | English |
| 365 | 106.87 | 22.04 | 2017.10.1-2017.10.31 | Broadleaf | 58.9 | 24.5 | 41.5 | Lei et al. (2020)137 | English |
| 366 | 106.87 | 22.04 | 2017.1.1-2017.1.31 | Broadleaf | 115 | 25.6 | 22.2 | Lei et al. (2020)137 | English |
| 367 | 106.87 | 22.04 | 2017.12.1-2017.12.31 | Broadleaf | 58.6 | 8.5 | 14.2 | Lei et al. (2020)137 | English |
| 368 | 109.75 | 26.83 | 2005.2.1-2005.2.28 | Needleleaf | 109.5 | 38.3 | 35 | Li (2007)138 | Chinese |
| 369 | 109.75 | 26.83 | 2005.3.1-2005.3.31 | Needleleaf | 67.9 | 19.9 | 29.3 | Li (2007)138 | Chinese |
| 370 | 109.75 | 26.83 | 2005.12.1-2005.12.31 | Needleleaf | 48 | 13.7 | 28.58 | Li (2007)138 | Chinese |
| 371 | 109.75 | 26.83 | 2005.1.1-2005.1.31 | Needleleaf | 68.3 | 18.5 | 27.1 | Li (2007)138 | Chinese |
| 372 | 109.75 | 26.83 | 2005.4.1-2005.4.30 | Needleleaf | 103.1 | 21.5 | 20.9 | Li (2007)138 | Chinese |
| 373 | 109.75 | 26.83 | 2005.1.1-2005.12.31 | Needleleaf | 1077.5 | 221.6 | 20.56 | Li (2007)138 | Chinese |
| 374 | 109.75 | 26.83 | 2005.10.1-2005.10.31 | Needleleaf | 38.6 | 7.4 | 19.15 | Li (2007)138 | Chinese |
| 375 | 109.75 | 26.83 | 2005.11.1-2005.11.30 | Needleleaf | 69 | 12.8 | 18.48 | Li (2007)138 | Chinese |
| 376 | 109.75 | 26.83 | 2005.9.1-2005.9.30 | Needleleaf | 30.4 | 5.3 | 17.43 | Li (2007)138 | Chinese |
| 377 | 109.75 | 26.83 | 2005.7.1-2005.7.31 | Needleleaf | 113.4 | 18.4 | 16.2 | Li (2007)138 | Chinese |
| 378 | 109.75 | 26.83 | 2005.5.1-2005.5.31 | Needleleaf | 160.4 | 25.9 | 16.1 | Li (2007)138 | Chinese |
| 379 | 109.75 | 26.83 | 2005.8.1-2005.8.31 | Needleleaf | 61.4 | 9.4 | 15.31 | Li (2007)138 | Chinese |
| 380 | 109.75 | 26.83 | 2005.6.1-2005.6.30 | Needleleaf | 207.5 | 30.5 | 14.7 | Li (2007)138 | Chinese |
| 381 | 116.81 | 40.5 | 2010.7.1-2010.10.31 | Needleleaf | 577.3584906 | 122.4 | 21.2 | Li (2012)139 | Chinese |
| 382 | 116.81 | 40.5 | 2010.7.1-2010.10.31 | Broadleaf | 483.4288052 | 118.15 | 24.44 | Li (2012)139 | Chinese |
| 383 | 106.15 | 35.97 | 2012.10.1-2012.10.31 | Shrubs | 7 | 1.74 | 24.89 | Li (2014)140 | Chinese |
| 384 | 106.15 | 35.97 | 2011.6.1-2011.6.30 | Shrubs | 31 | 6.9 | 22.26 | Li (2014)140 | Chinese |
| 385 | 106.15 | 35.97 | 2011.10.1-2011.10.31 | Shrubs | 38 | 6.81 | 17.91 | Li (2014)140 | Chinese |
| 386 | 106.15 | 35.97 | 2012.5.1-2012.5.31 | Shrubs | 65 | 11.21 | 17.25 | Li (2014)140 | Chinese |
| 387 | 106.15 | 35.97 | 2012.7.1-2012.7.31 | Shrubs | 75 | 10.39 | 13.85 | Li (2014)140 | Chinese |
| 388 | 106.15 | 35.97 | 2011.5.1-2011.5.31 | Shrubs | 47 | 6.5 | 13.83 | Li (2014)140 | Chinese |
| 389 | 106.15 | 35.97 | 2011.5.1-2011.10.31 | Shrubs | 473 | 61.2 | 12.94 | Li (2014)140 | Chinese |
| 390 | 106.15 | 35.97 | 2011.7.1-2011.7.31 | Shrubs | 123 | 15.25 | 12.39 | Li (2014)140 | Chinese |
| 391 | 106.15 | 35.97 | 2011.9.1-2011.9.30 | Shrubs | 129 | 15.82 | 12.27 | Li (2014)140 | Chinese |
| 392 | 106.15 | 35.97 | 2011.8.1-2011.8.31 | Shrubs | 105 | 9.92 | 9.45 | Li (2014)140 | Chinese |
| 393 | 106.15 | 35.97 | 2012.5.1-2012.10.31 | Shrubs | 551 | 49.72 | 9.02 | Li (2014)140 | Chinese |
| 394 | 106.15 | 35.97 | 2012.9.1-2012.9.30 | Shrubs | 130 | 9.45 | 7.27 | Li (2014)140 | Chinese |
| 395 | 106.15 | 35.97 | 2012.8.1-2012.8.31 | Shrubs | 154 | 9.85 | 6.4 | Li (2014)140 | Chinese |
| 396 | 106.15 | 35.97 | 2012.6.1-2012.6.30 | Shrubs | 120 | 7.07 | 5.89 | Li (2014)140 | Chinese |
| 397 | 106.15 | 35.97 | 2011.6.1-2011.6.30 | Needleleaf | 31 | 11.09 | 35.77 | Li (2014)140 | Chinese |
| 398 | 106.15 | 35.97 | 2011.10.1-2011.10.31 | Needleleaf | 38 | 12.62 | 33.2 | Li (2014)140 | Chinese |
| 399 | 106.15 | 35.97 | 2012.10.1-2012.10.31 | Needleleaf | 7 | 2.22 | 31.75 | Li (2014)140 | Chinese |
| 400 | 106.15 | 35.97 | 2012.5.1-2012.5.31 | Needleleaf | 65 | 14.33 | 22.05 | Li (2014)140 | Chinese |
| 401 | 106.15 | 35.97 | 2011.5.1-2011.10.31 | Needleleaf | 473 | 97.26 | 20.56 | Li (2014)140 | Chinese |
| 402 | 106.15 | 35.97 | 2011.7.1-2011.7.31 | Needleleaf | 123 | 23.99 | 19.5 | Li (2014)140 | Chinese |
| 403 | 106.15 | 35.97 | 2011.9.1-2011.9.30 | Needleleaf | 129 | 24.12 | 18.7 | Li (2014)140 | Chinese |
| 404 | 106.15 | 35.97 | 2011.8.1-2011.8.31 | Needleleaf | 105 | 18.16 | 17.3 | Li (2014)140 | Chinese |
| 405 | 106.15 | 35.97 | 2012.7.1-2012.7.31 | Needleleaf | 75 | 12.4 | 16.53 | Li (2014)140 | Chinese |
| 406 | 106.15 | 35.97 | 2011.5.1-2011.5.31 | Needleleaf | 47 | 7.29 | 15.51 | Li (2014)140 | Chinese |
| 407 | 106.15 | 35.97 | 2012.5.1-2012.10.31 | Needleleaf | 551 | 70.7 | 12.83 | Li (2014)140 | Chinese |
| 408 | 106.15 | 35.97 | 2012.6.1-2012.6.30 | Needleleaf | 120 | 15.14 | 12.62 | Li (2014)140 | Chinese |
| 409 | 106.15 | 35.97 | 2012.9.1-2012.9.30 | Needleleaf | 130 | 12.7 | 9.77 | Li (2014)140 | Chinese |
| 410 | 106.15 | 35.97 | 2012.8.1-2012.8.31 | Needleleaf | 154 | 13.91 | 9.04 | Li (2014)140 | Chinese |
| 411 | 106.14 | 35.98 | 2012.10.1-2012.10.31 | Broadleaf | 7 | 2.4 | 34.29 | Li (2014)140 | Chinese |
| 412 | 106.15 | 35.97 | 2012.10.1-2012.10.31 | Broadleaf | 7 | 2.18 | 31.09 | Li (2014)140 | Chinese |
| 413 | 106.14 | 35.98 | 2012.7.1-2012.7.31 | Broadleaf | 75 | 14.32 | 19.1 | Li (2014)140 | Chinese |
| 414 | 106.15 | 35.97 | 2012.5.1-2012.5.31 | Broadleaf | 65 | 11.02 | 16.96 | Li (2014)140 | Chinese |
| 415 | 106.14 | 35.98 | 2012.9.1-2012.9.30 | Broadleaf | 130 | 21.61 | 16.62 | Li (2014)140 | Chinese |
| 416 | 106.15 | 35.97 | 2012.7.1-2012.7.31 | Broadleaf | 75 | 11.77 | 15.69 | Li (2014)140 | Chinese |
| 417 | 106.14 | 35.98 | 2012.7.1-2012.10.31 | Broadleaf | 366 | 56.44 | 15.42 | Li (2014)140 | Chinese |
| 418 | 106.14 | 35.98 | 2012.8.1-2012.8.31 | Broadleaf | 154 | 18.1 | 11.76 | Li (2014)140 | Chinese |
| 419 | 106.15 | 35.97 | 2012.5.1-2012.10.31 | Broadleaf | 551 | 62.82 | 11.4 | Li (2014)140 | Chinese |
| 420 | 106.15 | 35.97 | 2012.9.1-2012.9.30 | Broadleaf | 130 | 12.3 | 9.46 | Li (2014)140 | Chinese |
| 421 | 106.15 | 35.97 | 2012.8.1-2012.8.31 | Broadleaf | 154 | 14.44 | 9.38 | Li (2014)140 | Chinese |
| 422 | 106.15 | 35.97 | 2012.6.1-2012.6.30 | Broadleaf | 120 | 11.11 | 9.26 | Li (2014)140 | Chinese |
| 423 | 109.25 | 36.72 | 2009.4.20-2009.11.30 | Herbaceous plant | 377.7 | 34.34 | 9.1 | Li and Bai (2013)141 | Chinese |
| 424 | 109.25 | 36.72 | 2010.4.20-2010.11.30 | Herbaceous plant | 430.7 | 38.6 | 9 | Li and Bai (2013)141 | Chinese |
| 425 | 109.25 | 36.72 | 2008.4.20-2008.11.30 | Herbaceous plant | 307.18 | 26.84 | 8.7 | Li and Bai (2013)141 | Chinese |
| 426 | 102.97 | 30.86 | 2001.7.1-2001.9.30;  2002.6.1-2002.8.31 | Shrubs | 241.1 | 60.15 | 24.95 | Li et al. (2006)142 | Chinese |
| 427 | 102.97 | 30.86 | 2001.7.1-2001.9.30;  2002.6.1-2002.8.31 | Needleleaf | 245.1 | 81.6 | 33.3 | Li et al. (2006)142 | Chinese |
| 428 | 116.47 | 39.9 | 2001.5.1-2001.5.31 | Mixed | 5.5 | 1.79 | 32.59 | Li et al. (2006b)143 | Chinese |
| 429 | 116.47 | 39.9 | 2001.9.1-2001.9.30 | Mixed | 24.9 | 7.25 | 29.1 | Li et al. (2006b)143 | Chinese |
| 430 | 116.47 | 39.9 | 2001.4.1-2001.4.30 | Mixed | 22.2 | 6.36 | 28.65 | Li et al. (2006b)143 | Chinese |
| 431 | 116.47 | 39.9 | 2001.10.1-2001.10.31 | Mixed | 35.5 | 10.09 | 28.42 | Li et al. (2006b)143 | Chinese |
| 432 | 116.47 | 39.9 | 2001.6.1-2001.6.30 | Mixed | 101.8 | 28.13 | 27.63 | Li et al. (2006b)143 | Chinese |
| 433 | 116.47 | 39.9 | 2001.7.1-2001.7.31 | Mixed | 96.3 | 26 | 26.99 | Li et al. (2006b)143 | Chinese |
| 434 | 116.47 | 39.9 | 2001.4.1-2001.10.31 | Mixed | 512.8 | 138.05 | 26.92 | Li et al. (2006b)143 | Chinese |
| 435 | 116.47 | 39.9 | 2001.8.1-2001.8.31 | Mixed | 226.6 | 58.45 | 25.79 | Li et al. (2006b)143 | Chinese |
| 436 | 120.95 | 42.88333 | 2009.6.1-2009.9.5 | Shrubs | 103.1 | 25.8 | 25.02 | Li et al. (2010)144 | Chinese |
| 437 | 116.83 | 40.5 | 2010.7.1-2010.10.31 | Needleleaf | 468.4 | 127.7 | 27.26 | Li et al. (2012)145 | Chinese |
| 438 | 116.83 | 40.5 | 2010.7.1-2010.10.31 | Broadleaf | 468.4 | 80.37 | 17.16 | Li et al. (2012)145 | Chinese |
| 439 | 114.63 | 27.67 | 2012.4.1-2012.6.30 | Needleleaf | 531.6 | 162.4 | 30.5 | Li et al. (2014)146 | Chinese |
| 440 | 114.63 | 27.67 | 2012.4.1-2012.6.30 | Broadleaf | 531.6 | 118.8 | 22.35 | Li et al. (2014)146 | Chinese |
| 441 | 110.1915 | 39.49378 | 2012.5.1-2012.9.30 | Shrubs | 520.6 | 144.21 | 27.7 | Li et al. (2014b)147 | Chinese |
| 442 | 116.01 | 40.35 | 2013.5.1-2013.10.31 | Broadleaf | 473.5 | 72.06 | 15.22 | Li et al. (2019)148 | Chinese |
| 443 | 116.01 | 40.35 | 2013.5.1-2013.10.31 | Needleleaf | 549.9 | 129.5 | 23.55 | Li et al. (2019b)149 | Chinese |
| 444 | 116.01 | 40.35 | 2013.5.1-2013.10.31 | Mixed | 549.9 | 120.1 | 21.84 | Li et al. (2019b)149 | Chinese |
| 445 | 117.12 | 36.33 | 2017.5.1-2017.10.31 | Needleleaf | 452.36 | 97.18 | 21.82 | Li et al. (2021)150 | English |
| 446 | 117.12 | 36.33 | 2017.5.1-2017.10.31 | Needleleaf | 427.2 | 59.7 | 14 | Li et al. (2021)150 | English |
| 447 | 117.12 | 36.33 | 2017.5.1-2017.10.31 | Broadleaf | 497.2 | 66.65 | 13.4 | Li et al. (2021)150 | English |
| 448 | 117.59 | 41.83 | 2010.6.1-2010.10.31 | Needleleaf | 209.98 | 62.62 | 29.82 | Liang (2014)151 | English |
| 449 | -47.9 | -19.2 | 1997.5.1-1999.4.30 | Needleleaf | 3312 | 811.44 | 24.5 | Lilienfein and Wilcke (2004)152 | English |
| 450 | 3.6 | 43.74 | 2006.4.25-2007.5.15 | Broadleaf | 1605 | 410.08 | 25.55 | Limousin et al. (2008)153 | English |
| 451 | -121.95 | 45.82 | 2000.3.30-2000.12.3 | Needleleaf | 618.7 | 155 | 25 | Link et al. (2004)154 | English |
| 452 | -121.95 | 45.82 | 1999.4.8-1999.11.8 | Needleleaf | 450.9 | 102.7 | 22.8 | Link et al. (2004)154 | English |
| 453 | 106.12 | 35.94 | 2011.6.1-2011.6.30 | Shrubs | 31 | 7.6 | 24.59 | Liu (2013)155 | Chinese |
| 454 | 106.12 | 35.94 | 2011.7.1-2011.7.31 | Shrubs | 123 | 24.7 | 20.06 | Liu (2013)155 | Chinese |
| 455 | 106.12 | 35.94 | 2011.10.1-2011.10.31 | Shrubs | 38 | 6.9 | 18.09 | Liu (2013)155 | Chinese |
| 456 | 106.12 | 35.94 | 2011.6.1-2011.10.31 | Shrubs | 426 | 71.35 | 16.75 | Liu (2013)155 | Chinese |
| 457 | 106.12 | 35.94 | 2011.9.1-2011.9.30 | Shrubs | 129 | 17.75 | 13.76 | Liu (2013)155 | Chinese |
| 458 | 106.12 | 35.94 | 2011.8.1-2011.8.31 | Shrubs | 105 | 14.4 | 13.74 | Liu (2013)155 | Chinese |
| 459 | 106.12 | 35.94 | 2011.6.1-2011.6.30 | Needleleaf | 31 | 11.1 | 35.78 | Liu (2013)155 | Chinese |
| 460 | 106.12 | 35.94 | 2011.10.1-2011.10.31 | Needleleaf | 38 | 12.6 | 33.27 | Liu (2013)155 | Chinese |
| 461 | 106.12 | 35.94 | 2011.6.1-2011.10.31 | Needleleaf | 426 | 93.8 | 22.02 | Liu (2013)155 | Chinese |
| 462 | 106.12 | 35.94 | 2011.7.1-2011.7.31 | Needleleaf | 123 | 26 | 21.16 | Liu (2013)155 | Chinese |
| 463 | 106.12 | 35.94 | 2011.9.1-2011.9.30 | Needleleaf | 129 | 25.9 | 20.11 | Liu (2013)155 | Chinese |
| 464 | 106.12 | 35.94 | 2011.8.1-2011.8.31 | Needleleaf | 105 | 18.2 | 17.36 | Liu (2013)155 | Chinese |
| 465 | 103.4 | 26.45 | 2013.6.1-2013.10.31 | Needleleaf | 609 | 112.4 | 18.46 | Liu (2014)156 | Chinese |
| 466 | 103.4 | 26.45 | 2013.6.1-2013.10.31 | Mixed | 609 | 141.95 | 23.31 | Liu (2014)156 | Chinese |
| 467 | 103.4 | 26.45 | 2013.6.1-2013.10.31 | Broadleaf | 609 | 87.4 | 14.35 | Liu (2014)156 | Chinese |
| 468 | 106.38 | 29.91 | 2012.4.1-2012.9.30;  2013.4.1-2013.9.30 | Mixed | 1503.2 | 311.43 | 62.16 | Liu (2015)157 | Chinese |
| 469 | 106.38 | 29.91 | 2012.4.1-2012.9.30;  2013.4.1-2013.9.30 | Broadleaf | 1503.2 | 268.23 | 17.84 | Liu (2015)157 | Chinese |
| 470 | 122.28 | 53.39 | 2013.6.1-2013.6.30 | Broadleaf | 59.4 | 14.94 | 25.15 | Liu (2015b)158 | Chinese |
| 471 | 122.28 | 53.39 | 2013.8.1-2013.8.31 | Broadleaf | 65.4 | 11.79 | 18.03 | Liu (2015b)158 | Chinese |
| 472 | 122.28 | 53.39 | 2013.5.1-2013.5.31 | Broadleaf | 69.2 | 11.62 | 16.79 | Liu (2015b)158 | Chinese |
| 473 | 122.28 | 53.39 | 2013.9.1-2013.9.30 | Broadleaf | 52.2 | 8.7 | 16.67 | Liu (2015b)158 | Chinese |
| 474 | 122.28 | 53.39 | 2013.5.1-2013.9.30 | Broadleaf | 1749.4 | 315.28 | 13.67 | Liu (2015b)158 | Chinese |
| 475 | 122.28 | 53.39 | 2013.7.1-2013.7.31 | Broadleaf | 198.4 | 13.71 | 6.91 | Liu (2015b)158 | Chinese |
| 476 | 122.34 | 52.56 | 2014.5.1-2014.9.30 | Needleleaf | 289.4 | 60.54 | 20.9 | Liu et al (2015)159 | Chinese |
| 477 | 102.75 | 24.11 | 1986.5.1-1986.10.31;  1987.5.1-1987.10.31 | Needleleaf | 721.9 | 96.7 | 13.4 | Liu et al. (1991)160 | Chinese |
| 478 | 102.75 | 24.11 | 1986.5.1-1986.10.31;  1987.5.1-1987.10.31 | Broadleaf | 721.9 | 131.4 | 18.2 | Liu et al. (1991)160 | Chinese |
| 479 | 128.8 | 47.24 | 1993.1.1-1993.12.31 | Needleleaf | 743.1 | 166.7 | 22.43 | Liu et al. (1993)161 | Chinese |
| 480 | 128.8 | 47.24 | 1993.1.1-1993.12.31 | Mixed | 743.1 | 129.3 | 17.4 | Liu et al. (1993)161 | Chinese |
| 481 | 128.8 | 47.24 | 1993.1.1-1993.12.31 | Broadleaf | 743.1 | 127.8 | 17.2 | Liu et al. (1993)161 | Chinese |
| 482 | 101.27 | 21.93 | 2002.1.1-2004.12.31 | Broadleaf | 4527 | 606 | 13.25 | Liu et al. (2008)162 | English |
| 483 | 117.25 | 42.32 | 2009.5.1-2009.10.31 | Needleleaf | 348.4 | 79.68 | 22.87 | Liu et al. (2011)163 | Chinese |
| 484 | 109.47 | 19.52 | 2010.5.1-2010.5.31 | Broadleaf | 141.18 | 33.74 | 23.9 | Liu et al. (2012)164 | Chinese |
| 485 | 109.47 | 19.52 | 2010.9.1-2010.9.30 | Broadleaf | 621.12 | 100.06 | 16.11 | Liu et al. (2012)164 | Chinese |
| 486 | 119.65 | 43.03 | 2015.5.1-2015.9.30 | Needleleaf | 166.8 | 49.13 | 29.45 | Liu et al. (2016)165 | Chinese |
| 487 | 112.54 | 23.17 | 2009.12.1-2009.12.31 | Broadleaf | 55.4 | 19.7 | 3506 | Liu et al. (2016b)166 | Chinese |
| 488 | 112.54 | 23.17 | 2009.2.1-2009.2.28 | Broadleaf | 5.4 | 4.9 | 90.7 | Liu et al. (2016b)166 | Chinese |
| 489 | 112.54 | 23.17 | 2009.1.1-2009.1.31 | Broadleaf | 31.6 | 22.4 | 70.9 | Liu et al. (2016b)166 | Chinese |
| 490 | 112.54 | 23.17 | 2009.10.1-2009.10.31 | Broadleaf | 73.6 | 26 | 35.33 | Liu et al. (2016b)166 | Chinese |
| 491 | 112.54 | 23.17 | 2009.3.1-2009.3.31 | Broadleaf | 156.3 | 54.4 | 34.8 | Liu et al. (2016b)166 | Chinese |
| 492 | 112.54 | 23.17 | 2009.11.1-2009.11.30 | Broadleaf | 121.2 | 36.9 | 30.4 | Liu et al. (2016b)166 | Chinese |
| 493 | 112.54 | 23.17 | 2009.5.1-2009.5.31 | Broadleaf | 409 | 109.4 | 26.75 | Liu et al. (2016b)166 | Chinese |
| 494 | 112.54 | 23.17 | 2009.1.1-2009.12.31 | Broadleaf | 1895.5 | 498.9 | 26.3 | Liu et al. (2016b)166 | Chinese |
| 495 | 112.54 | 23.17 | 2009.7.1-2009.7.31 | Broadleaf | 225.2 | 55.7 | 24.73 | Liu et al. (2016b)166 | Chinese |
| 496 | 112.54 | 23.17 | 2009.9.1-2009.9.30 | Broadleaf | 110.6 | 25.7 | 23.24 | Liu et al. (2016b)166 | Chinese |
| 497 | 112.54 | 23.17 | 2009.6.1-2009.6.30 | Broadleaf | 260.8 | 58.6 | 22.47 | Liu et al. (2016b)166 | Chinese |
| 498 | 112.54 | 23.17 | 2009.4.1-2009.4.30 | Broadleaf | 212 | 43.3 | 20.42 | Liu et al. (2016b)166 | Chinese |
| 499 | 112.54 | 23.17 | 2009.8.1-2009.8.31 | Broadleaf | 234.4 | 41.9 | 17.88 | Liu et al. (2016b)166 | Chinese |
| 500 | 106.33 | 35.47 | 2015.6.1-2015.10.31 | Needleleaf | 499 | 86.7 | 17.37 | Liu et al. (2017)167 | English |
| 501 | 145.01 | -37.82 | 2009.5.25-2009.10.31 | Broadleaf | 680.4 | 118.8 | 44.4 | Livesley and Glover (2014)168 | English |
| 502 | 145.01 | -37.82 | 2009.5.25-2009.10.31 | Broadleaf | 680.4 | 119.2 | 29.5 | Livesley and Glover (2014)168 | English |
| 503 | 1.8 | 42.2 | 1993.7.1-1995.12.31 | Needleleaf | 556 | 98.1 | 17.64 | Llorens (1997)169 | English |
| 504 | -59.95 | -2.95 | 1983.9.3-1985.8.21 | Broadleaf | 4804 | 428 | 8.91 | Lloyd et al. (1988)170 | English |
| 505 | -84.02 | 10.43 | 2016.3.1-2017.9.30 | Broadleaf | 429.5 | 118.8 | 27.66006985 | Lopes et al. (2005)171 | English |
| 506 | -84.02 | 10.43 | 2000.1.1-2000.12.31 | Broadleaf | 4127 | 708 | 17.1 | Loescher et al. (2005)172 | English |
| 507 | -84.02 | 10.43 | 1998.1.1-2000.12.31 | Broadleaf | 9360.5 | 1254.8 | 16.6 | Loescher et al. (2005)172 | English |
| 508 | -84.02 | 10.43 | 1999.1.1-1999.12.31 | Broadleaf | 3575 | 587 | 16.4 | Loescher et al. (2005)172 | English |
| 509 | -84.02 | 10.43 | 1998.1.1-1998.12.31 | Broadleaf | 3495 | 564 | 16.1 | Loescher et al. (2005)172 | English |
| 510 | -0.77 | 44.7 | 1987.6.20-1987.9.22 | Needleleaf | 111 | 21 | 18.9 | Loustau et al. (1992)173 | English |
| 511 | -0.77 | 44.7 | 1988.1.1-1988.12.31 | Needleleaf | 949 | 153.8 | 16.21 | Loustau et al. (1992)173 | English |
| 512 | -0.77 | 44.7 | 1989.1.1-1989.12.31 | Needleleaf | 284.9 | 45.4 | 15.94 | Loustau et al. (1992)173 | English |
| 513 | -0.76 | 44.7 | 1987.6.1-1989.12.31 | Needleleaf | 2300 | 328.9 | 14.33 | Loustau et al. (1992b)174 | English |
| 514 | 106.33 | 35.47 | 2005.8.1-2005.8.31 | Shrubs | 157.1 | 36.9 | 23.46 | Lu (2008)175 | Chinese |
| 515 | 106.33 | 35.47 | 2004.6.1-2004.6.30 | Shrubs | 47.3 | 10 | 21.14 | Lu (2008)175 | Chinese |
| 516 | 106.33 | 35.47 | 2004.7.1-2004.7.31 | Shrubs | 183.3 | 36.5 | 19.89 | Lu (2008)175 | Chinese |
| 517 | 106.33 | 35.47 | 2005.9.1-2005.9.30 | Shrubs | 140.7 | 28 | 19.86 | Lu (2008)175 | Chinese |
| 518 | 106.33 | 35.47 | 2005.6.1-2005.9.30 | Shrubs | 600.7 | 95.6 | 15.92 | Lu (2008)175 | Chinese |
| 519 | 106.33 | 35.47 | 2004.6.1-2004.9.30 | Shrubs | 509.6 | 77.8 | 15.27 | Lu (2008)175 | Chinese |
| 520 | 106.33 | 35.47 | 2005.6.1-2005.6.30 | Shrubs | 41.4 | 5.8 | 14.01 | Lu (2008)175 | Chinese |
| 521 | 106.33 | 35.47 | 2004.9.1-2004.9.30 | Shrubs | 138.4 | 16.2 | 11.73 | Lu (2008)175 | Chinese |
| 522 | 106.33 | 35.47 | 2004.8.1-2004.8.31 | Shrubs | 140.6 | 15.1 | 10.76 | Lu (2008)175 | Chinese |
| 523 | 106.33 | 35.47 | 2005.7.1-2005.7.31 | Shrubs | 261.5 | 25 | 9.58 | Lu (2008)175 | Chinese |
| 524 | 106.33 | 35.47 | 2004.6.1-2004.6.30 | Needleleaf | 48 | 12.2 | 25.48 | Lu (2008)175 | Chinese |
| 525 | 106.33 | 35.47 | 2004.8.1-2004.8.31 | Needleleaf | 143.3 | 27.8 | 19.43 | Lu (2008)175 | Chinese |
| 526 | 106.33 | 35.47 | 2004.6.1-2004.9.30 | Needleleaf | 510.6 | 80.1 | 15.69 | Lu (2008)175 | Chinese |
| 527 | 106.33 | 35.47 | 2004.7.1-2004.7.31 | Needleleaf | 177.6 | 25.8 | 14.51 | Lu (2008)175 | Chinese |
| 528 | 106.33 | 35.47 | 2004.9.1-2004.9.30 | Needleleaf | 141.7 | 14.2 | 10.06 | Lu (2008)175 | Chinese |
| 529 | 106.33 | 35.47 | 2004.6.1-2004.6.30 | Broadleaf | 47.95 | 8.45 | 17.66 | Lu (2008)175 | Chinese |
| 530 | 106.33 | 35.47 | 2004.7.1-2004.7.31 | Broadleaf | 166.15 | 26.4 | 15.07 | Lu (2008)175 | Chinese |
| 531 | 106.33 | 35.47 | 2004.6.1-2004.9.30 | Broadleaf | 494.7 | 65.35 | 13.27 | Lu (2008)175 | Chinese |
| 532 | 106.33 | 35.47 | 2004.8.1-2004.8.31 | Broadleaf | 141.8 | 16.75 | 11.99 | Lu (2008)175 | Chinese |
| 533 | 106.33 | 35.47 | 2004.9.1-2004.9.30 | Broadleaf | 138.3 | 13.75 | 10.41 | Lu (2008)175 | Chinese |
| 534 | 116.09 | 40.06 | 2011.7.1-2011.8.31;  2012.7.1-2012.8.31 | Shrubs | 737.17 | 159.29 | 17.77 | Lv (2013)176 | Chinese |
| 535 | 116.09 | 40.06 | 2011.7.1-2011.8.31;  2012.7.1-2012.8.31 | Needleleaf | 631.22 | 246.7133333 | 27.52 | Lv (2013)176 | Chinese |
| 536 | 116.09 | 40.06 | 2011.7.1-2011.8.31;  2012.7.1-2012.8.31 | Mixed | 597.62 | 275.54 | 30.74 | Lv (2013)176 | Chinese |
| 537 | 100.2 | 37.23333 | 2010.7.6-2010.9.30 | Shrubs | 156.67 | 74.51 | 47.56 | Ma et al. (2012)177 | Chinese |
| 538 | 125.48 | 51.37 | 2012.6.15-2012.9.25 | Needleleaf | 216.6 | 62.5 | 28.8 | Ma et al. (2015)178 | Chinese |
| 539 | 80.77 | 41.47 | 2016.7.1-2016.7.31 | Needleleaf | 42.97 | 29.94 | 68.09 | Ma et al. (2017)179 | Chinese |
| 540 | 80.77 | 41.47 | 2016.7.1-2016.7.31 | Needleleaf | 43.82 | 20.74 | 46.64333333 | Ma et al. (2017)179 | Chinese |
| 541 | 80.77 | 41.47 | 2016.7.1-2016.7.31 | Mixed | 30.33 | 5.84 | 19.26 | Ma et al. (2017)179 | Chinese |
| 542 | 100.3 | 38.51 | 2014.5.1-2015.9.30 | Shrubs | 292.4 | 98.9 | 36.66 | Ma et al. (2017b)180 | Chinese |
| 543 | 107.91 | 34.53 | 2016.5.1-2016.10.31 | Needleleaf | 510 | 121.8 | 23.9 | Ma et al. (2019)181 | English |
| 544 | 107.91 | 34.53 | 2016.5.1-2016.10.31 | Broadleaf | 510 | 89.5 | 17.6 | Ma et al. (2019)181 | English |
| 545 | 107.91 | 34.53 | 2015.1.1-2015.12.31 | Broadleaf | 732.2 | 127.8 | 17.5 | Ma et al. (2020)182 | English |
| 546 | 107.91 | 34.53 | 2015.1.1-2015.12.31 | Broadleaf | 732.2 | 83 | 11.3 | Ma et al. (2020)182 | English |
| 547 | 107.92 | 34.55 | 2015.1.1-2016.12.31 | Broadleaf | 1242.2 | 201.8 | 16.25 | Ma et al. (2021)183 | English |
| 548 | 114.03 | 4.2 | 2001.7.1-2002.6.30 | Broadleaf | 2292 | 340.5 | 14.9 | Manfroi et al. (2006)184 | English |
| 549 | 114.03 | 4.2 | 2001.7.1-2004.7.17 | Broadleaf | 7399 | 884 | 11.95 | Manfroi et al. (2006)184 | English |
| 550 | 114.03 | 4.2 | 2003.7.1-2004.7.17 | Broadleaf | 2668 | 306.9 | 11.5 | Manfroi et al. (2006)184 | English |
| 551 | 114.03 | 4.2 | 2002.7.1-2003.6.30 | Broadleaf | 2439 | 236.5 | 9.7 | Manfroi et al. (2006)184 | English |
| 552 | -72.1 | -0.65 | 1993.12.1-1996.2.29 | Broadleaf | 3120.9 | 492.57 | 15.78 | Marin et al. (2000)185 | English |
| 553 | -72.1 | -0.67 | 1993.12.1-1996.2.29 | Broadleaf | 3158.4 | 359.13 | 11.37 | Marin et al. (2000)185 | English |
| 554 | -72.08 | -0.67 | 1993.12.1-1996.2.29 | Broadleaf | 3293 | 341.7 | 10.38 | Marin et al. (2000)185 | English |
| 555 | -72.07 | -0.65 | 1993.12.1-1996.2.29 | Broadleaf | 3273.8 | 321.79 | 9.83 | Marin et al. (2000)185 | English |
| 556 | 12.31 | 41.71 | 2004.9.1-2008.12.31 | Mixed | 2774 | 1109.6 | 40 | Mazza et al. (2011)186 | English |
| 557 | 12.31 | 41.71 | 2004.9.1-2008.12.31 | Mixed | 2774 | 638.2 | 23 | Mazza et al. (2011)186 | English |
| 558 | 145.27 | -16.53 | 2001.7.13-2004.6.30 | Broadleaf | 9131 | 2688 | 29.43817764 | Mcjannet et al. (2007)187 | English |
| 559 | 145.48 | -17.45 | 2000.11.30-2004.6.30 | Broadleaf | 10724 | 3072 | 28.6460276 | Mcjannet et al. (2007)187 | English |
| 560 | 145.28 | -16.53 | 2000.12.21-2004.6.30 | Broadleaf | 12813 | 3407 | 26.59018185 | Mcjannet et al. (2007)187 | English |
| 561 | 145.25 | -16.17 | 2001.9.9-2004.6.30 | Broadleaf | 7155 | 1590 | 22.22222222 | Mcjannet et al. (2007)187 | English |
| 562 | 145.26 | -16.14 | 2001.8.22-2004.6.30 | Broadleaf | 8862 | 1946 | 21.95892575 | Mcjannet et al. (2007)187 | English |
| 563 | 145.85 | -17.27 | 2002.10.3-2004.6.30 | Broadleaf | 16363 | 995 | 6.080792031 | Mcjannet et al. (2007)187 | English |
| 564 | -40.25 | -6.66 | 2003.12.1-2006.5.31 | Shrubs | 1658 | 251.54 | 13 | Medeiros et al. (2009)188 | English |
| 565 | 20.93 | 44.08 | 1996.6.1-2000.5.31 | Broadleaf | 6796 | 1114.26 | 16.4 | Michopoulos et al. (2001)189 | English |
| 566 | 117.86 | -32.31 | 2006.3.1-2007.2.28 | Broadleaf | 265 | 23 | 8.7 | Mitchell et al. (2009)190 | English |
| 567 | 106.24 | 35.51 | 2006.6.1-2006.6.30;  2007.6.1-2007.6.30 | Shrubs | 98.5 | 30.95 | 31.42 | Mo (2008)191 | Chinese |
| 568 | 106.24 | 35.51 | 2006.7.1-2006.7.31;  2007.7.1-2007.7.31 | Shrubs | 87.7 | 17.99 | 20.51 | Mo (2008)191 | Chinese |
| 569 | 106.24 | 35.51 | 2006.9.1-2006.9.30;  2007.9.1-2007.9.30 | Shrubs | 214.4 | 27.83 | 12.98 | Mo (2008)191 | Chinese |
| 570 | 106.24 | 35.51 | 2006.8.1-2006.8.31;  2007.8.1-2007.8.31 | Shrubs | 167.6 | 20.83 | 12.43 | Mo (2008)191 | Chinese |
| 571 | 106.24 | 35.51 | 2006.6.1-2006.6.30;  2007.6.1-2007.6.30 | Needleleaf | 98.5 | 29.99 | 30.42 | Mo (2008)191 | Chinese |
| 572 | 106.24 | 35.51 | 2006.7.1-2006.7.31;  2007.7.1-2007.7.31 | Needleleaf | 87.7 | 26.1 | 29.77 | Mo (2008)191 | Chinese |
| 573 | 106.24 | 35.51 | 2006.8.1-2006.8.31;  2007.8.1-2007.8.31 | Needleleaf | 167.6 | 27.23 | 16.26 | Mo (2008)191 | Chinese |
| 574 | 106.24 | 35.51 | 2006.9.1-2006.9.30;  2007.9.1-2007.9.30 | Needleleaf | 214.4 | 32.6 | 15.27 | Mo (2008)191 | Chinese |
| 575 | 106.24 | 35.51 | 2006.6.1-2006.6.30;  2007.6.1-2007.6.30 | Broadleaf | 98.5 | 26.11 | 26.51 | Mo (2008)191 | Chinese |
| 576 | 106.24 | 35.51 | 2006.7.1-2006.7.31;  2007.7.1-2007.7.31 | Broadleaf | 87.7 | 16.44 | 18.74 | Mo (2008)191 | Chinese |
| 577 | 106.24 | 35.51 | 2006.8.1-2006.8.31;  2007.8.1-2007.8.31 | Broadleaf | 167.6 | 26.03 | 15.5 | Mo (2008)191 | Chinese |
| 578 | 106.24 | 35.51 | 2006.9.1-2006.9.30;  2007.9.1-2007.9.30 | Broadleaf | 214.4 | 26.21 | 12.23 | Mo (2008)191 | Chinese |
| 579 | 115.43 | 39.63 | 2005.8.1-2005.8.31;  2006.8.12006.8.31;  2007.8.12007.8.31;  2008.8.1-2008.8.31 | Needleleaf | 101.8 | 15.35 | 15.08 | Mo et al. (2011)192 | Chinese |
| 580 | 115.43 | 39.63 | 2005.7.1-2005.7.31;  2006.7.1-2006.7.31;  2007.7.1-2007.7.31;  2008.7.1-2008.7.31 | Needleleaf | 140 | 16.93 | 12.09 | Mo et al. (2011)192 | Chinese |
| 581 | 115.43 | 39.63 | 2005.9.1-2005.9.30;  2006.9.1-2006.9.30;  2007.9.1-2007.9.30;  2008.9.1-2008.9.30 | Needleleaf | 22.2 | 2.65 | 11.94 | Mo et al. (2011)192 | Chinese |
| 582 | 115.43 | 39.63 | 2005.6.1-2006.6.30;  2006.6.1-2006.6.30;  2007.6.1-2007.6.30;  2008.6.1-2008.6.30 | Needleleaf | 129.8 | 15.35 | 11.83 | Mo et al. (2011)192 | Chinese |
| 583 | 115.43 | 39.63 | 2005.6.1-2006.6.30;  2006.6.1-2006.6.30;  2007.6.1-2007.6.30;  2008.6.1-2008.6.30 | Broadleaf | 129.8 | 28.6 | 22.03 | Mo et al. (2011)192 | Chinese |
| 584 | 115.43 | 39.63 | 2005.8.1-2005.8.31;  2006.8.1-2006.8.31;  2007.8.1-2007.8.31;  2008.8.1-2008.8.31 | Broadleaf | 101.8 | 19.65 | 19.3 | Mo et al. (2011)192 | Chinese |
| 585 | 115.43 | 39.63 | 2005.7.1-2005.7.31;  2006.7.1-2006.7.31;  2007.7.1-2007.7.31;  2008.7.1-2008.7.31 | Broadleaf | 140 | 26.15 | 18.68 | Mo et al. (2011)192 | Chinese |
| 586 | 115.43 | 39.63 | 2005.9.1-2005.9.30;  2006.9.1-2006.9.30;  2007.9.1-2007.9.30;  2008.9.1-2008.9.30 | Broadleaf | 22.2 | 3.35 | 15.09 | Mo et al. (2011)192 | Chinese |
| 587 | -55.29 | -29.78 | 2015.1.1-2015.1.31 | Broadleaf | 121 | 14.39 | 11.9 | Momolli et al. (2019)193 | English |
| 588 | -55.29 | -29.78 | 2015.1.1-2015.1.31 | Broadleaf | 188.7 | 19.62 | 10.4 | Momolli et al. (2019)193 | English |
| 589 | -55.29 | -29.78 | 2015.1.1-2015.1.31 | Broadleaf | 241 | 10.12 | 4.2 | Momolli et al. (2019)193 | English |
| 590 | -55.29 | -29.78 | 2015.1.1-2015.1.31 | Broadleaf | 53.6 | 3.69 | 6.9 | Momolli et al. (2019)193 | English |
| 591 | -55.29 | -29.78 | 2015.1.1-2015.1.31 | Broadleaf | 190.7 | 9.91 | 5.2 | Momolli et al. (2019)193 | English |
| 592 | -55.29 | -29.78 | 2015.1.1-2015.1.31 | Broadleaf | 135.1 | 12.42 | 9.2 | Momolli et al. (2019)193 | English |
| 593 | -55.29 | -29.78 | 2015.1.1-2015.1.31 | Broadleaf | 119 | 7.25 | 6.1 | Momolli et al. (2019)193 | English |
| 594 | -55.29 | -29.78 | 2015.1.1-2015.1.31 | Broadleaf | 66.8 | 6.14 | 9.2 | Momolli et al. (2019)193 | English |
| 595 | -55.29 | -29.78 | 2015.1.1-2015.1.31 | Broadleaf | 285.8 | 22.57 | 7.9 | Momolli et al. (2019)193 | English |
| 596 | -55.29 | -29.78 | 2015.1.1-2015.1.31 | Broadleaf | 181.9 | 24.37 | 13.4 | Momolli et al. (2019)193 | English |
| 597 | -55.29 | -29.78 | 2015.1.1-2015.1.31 | Broadleaf | 140.1 | 12.04 | 8.6 | Momolli et al. (2019)193 | English |
| 598 | -55.29 | -29.78 | 2015.1.1-2015.1.31 | Broadleaf | 223.5 | 31.51 | 14.1 | Momolli et al. (2019)193 | English |
| 599 | 11.5 | 46.36 | 1999.1.1-1999.12.31 | Needleleaf |  |  | 24.49 | Mosello et al. (2002)194 | English |
| 600 | 13.59 | 46.51 | 1999.1.1-1999.12.31 | Needleleaf |  |  | 21.76 | Mosello et al. (2002)194 | English |
| 601 | 13.59 | 46.51 | 1998.1.1-1998.12.31 | Needleleaf |  |  | 21.35 | Mosello et al. (2002)194 | English |
| 602 | 9.55 | 46.24 | 1999.1.1-1999.12.31 | Needleleaf |  |  | 19.43 | Mosello et al. (2002)194 | English |
| 603 | 9.55 | 46.24 | 1998.1.1-1998.12.31 | Needleleaf |  |  | 18.2 | Mosello et al. (2002)194 | English |
| 604 | 11.5 | 46.36 | 1998.1.1-1998.12.31 | Needleleaf |  |  | 17.56 | Mosello et al. (2002)194 | English |
| 605 | 11.4 | 44.3 | 1998.1.1-1998.12.31 | Broadleaf |  |  | 27.34 | Mosello et al. (2002)194 | English |
| 606 | 13.12 | 45.79 | 1999.1.1-1999.12.31 | Broadleaf |  |  | 22.58 | Mosello et al. (2002)194 | English |
| 607 | 16.18 | 38.43 | 1998.1.1-1999.12.31 | Broadleaf |  |  | 20.23 | Mosello et al. (2002)194 | English |
| 608 | 10.7 | 43.4 | 1998.1.1-1999.12.31 | Broadleaf |  |  | 19.39 | Mosello et al. (2002)194 | English |
| 609 | 13.07 | 43.29 | 1998.1.1-1998.12.31 | Broadleaf |  |  | 17.24 | Mosello et al. (2002)194 | English |
| 610 | 11.4 | 44.3 | 1999.1.1-1999.12.31 | Broadleaf |  |  | 15.28 | Mosello et al. (2002)194 | English |
| 611 | 13.07 | 43.29 | 1999.1.1-1999.12.31 | Broadleaf |  |  | 13.72 | Mosello et al. (2002)194 | English |
| 612 | 140.58 | 36.57 | 1999.1.1-1999.12.31 | Needleleaf | 1673.3 | 320.1 | 19.1 | Murakami (2007)195 | English |
| 613 | 140.58 | 36.57 | 2000.1.1-2000.12.31 | Needleleaf | 1365 | 256.4 | 18.9 | Murakami (2007)195 | English |
| 614 | 1.82 | 42.2 | 2007.4.4-2009.9.21 | Broadleaf | 957 | 142.5 | 14.8 | Muzylo et al. (2012)196 | English |
| 615 | -99.87 | 24.72 | 1997.5.1-1998.11.30 | Needleleaf | 1090.3 | 191 | 17.8 | Návar (2013)197 | English |
| 616 | -99.87 | 24.72 | 1997.5.1-1998.11.30 | Mixed | 1090.3 | 181.1 | 16.6 | Návar (2013)197 | English |
| 617 | -99.87 | 24.72 | 1997.5.1-1998.11.30 | Broadleaf | 1090.3 | 133.3 | 13 | Návar (2013)197 | English |
| 618 | -99.53 | 24.78 | 1987.5.1-1987.8.31 | Shrubs | 243.56 | 68.05 | 27.94 | Návar and Bryan(1994)198 | English |
| 619 | -99.53 | 24.78 | 1997.4.1-1998.4.30 | Shrubs | 489.1 | 92.1 | 18.9 | Návar et al. (1999)199 | English |
| 620 | -99.53 | 24.78 | 1995.9.1-1997.4.30 | Shrubs | 671.7 | 116.5 | 17.3 | Návar et al. (1999b)200 | English |
| 621 | 79.96 | 30.08 | 1996.8.1-1996.8.31 | Needleleaf | 227 | 62.42 | 27.5 | Negi et al. (1998)201 | English |
| 622 | 79.96 | 30.08 | 1996.8.1-1996.8.31 | Broadleaf | 227 | 29.05 | 12.8 | Negi et al. (1998)201 | English |
| 623 | 79.96 | 30.08 | 1996.8.1-1996.8.31 | Broadleaf | 227 | 45.62 | 20.1 | Negi et al. (1998)201 | English |
| 624 | 100.17 | 29.5 | 2012.9.1-2012.9.30 | Broadleaf | 57.4 | 15.53 | 27.06 | Ouyang et al. (2014)202 | Chinese |
| 625 | 100.17 | 29.5 | 2012.4.1-2012.4.30 | Broadleaf | 112.5 | 27.66 | 24.59 | Ouyang et al. (2014)202 | Chinese |
| 626 | 100.17 | 29.5 | 2012.6.1-2012.6.30 | Broadleaf | 158.3 | 36.52 | 23.07 | Ouyang et al. (2014)202 | Chinese |
| 627 | 100.17 | 29.5 | 2012.5.1-2012.5.31 | Broadleaf | 134.7 | 27.99 | 20.78 | Ouyang et al. (2014)202 | Chinese |
| 628 | 100.17 | 29.5 | 2012.8.1-2012.8.31 | Broadleaf | 203.9 | 39.82 | 19.53 | Ouyang et al. (2014)202 | Chinese |
| 629 | 100.17 | 29.5 | 2012.10.1-2012.10.31 | Broadleaf | 39.8 | 7.25 | 18.22 | Ouyang et al. (2014)202 | Chinese |
| 630 | 100.17 | 29.5 | 2012.1.1-2012.12.31 | Broadleaf | 1379.6 | 247.21 | 17.92 | Ouyang et al. (2014)202 | Chinese |
| 631 | 100.17 | 29.5 | 2012.7.1-2012.7.31 | Broadleaf | 368.1 | 63.41 | 17.23 | Ouyang et al. (2014)202 | Chinese |
| 632 | 100.17 | 29.5 | 2012.12.1-2012.12.31 | Broadleaf | 41.4 | 5.48 | 13.24 | Ouyang et al. (2014)202 | Chinese |
| 633 | 100.17 | 29.5 | 2012.3.1-2012.3.31 | Broadleaf | 62.7 | 7.18 | 11.45 | Ouyang et al. (2014)202 | Chinese |
| 634 | 100.17 | 29.5 | 2012.1.1-2012.1.31 | Broadleaf | 62.3 | 5.92 | 9.5 | Ouyang et al. (2014)202 | Chinese |
| 635 | 100.17 | 29.5 | 2012.11.1-2012.11.30 | Broadleaf | 28 | 2.43 | 8.68 | Ouyang et al. (2014)202 | Chinese |
| 636 | 100.17 | 29.5 | 2012.2.1-2012.2.28 | Broadleaf | 110.5 | 8.02 | 7 | Ouyang et al. (2014)202 | Chinese |
| 637 | -98.78 | 29.66 | 2000.8.7-2003.12.31 | Needleleaf | 2200 | 862.4 | 39.2 | Owens et al. (2006)203 | English |
| 638 | 15.35 | 50.81 | 2015.5.1-2015.10.31;  2016.5.1-2016.10.31;  2017.5.1-2017.10.31 | Needleleaf | 1986 | 317.76 | 16 | Palán and KřečekPalán (2018)204 | English |
| 639 | 110.93 | 30.83 | 2006.5.1-2006.10.31 | Needleleaf | 261.25 | 50.01 | 19.14 | Pan et al. (2011)205 | Chinese |
| 640 | 53 | 36.5 | 2012.5.1-2014.3.31 | Needleleaf | 697.82 | 190.12 | 27.24 | Panahandeh et al. (2022)206 | English |
| 641 | -79.83 | 9.81 | 2006.7.23-2006.9.20 | Broadleaf | 699.2 | 175 | 25.6 | Park_and_Cameron (2008)207 | English |
| 642 | -79.83 | 9.81 | 2006.7.23-2006.9.20 | Broadleaf | 699.2 | 86.2 | 13.5 | Park_and_Cameron (2008)207 | English |
| 643 | -79.83 | 9.81 | 2006.7.23-2006.9.20 | Broadleaf | 699.2 | 63.3 | 9.2 | Park_and_Cameron (2008)207 | English |
| 644 | -79.83 | 9.81 | 2006.7.23-2006.9.20 | Broadleaf | 699.2 | 104.4 | 15.7 | Park_and_Cameron (2008)207 | English |
| 645 | -79.83 | 9.81 | 2006.7.23-2006.9.20 | Broadleaf | 699.2 | 74.5 | 11.2 | Park_and_Cameron (2008)207 | English |
| 646 | 115.5 | 42.11667 | 2011.6.1-2011.9.30 | Shrubs |  |  | 20.86 | Peng et al. (2014)208 | Chinese |
| 647 | 115.5 | 42.11667 | 2011.6.1-2011.9.30 | Grassland |  |  | 7.88 | Peng et al. (2014)208 | Chinese |
| 648 | -8 | 38.53 | 2006.7.1-2007.5.31 | Broadleaf | 528.7 | 156.7 | 29.64 | Pereira et al. (2009)209 | English |
| 649 | -8 | 38.53 | 1996.10.1-1998.9.30 | Broadleaf | 1394.6 | 321.2 | 23.03 | Pereira et al. (2009)209 | English |
| 650 | -98.15 | 55.46 | 1994.7.4-1994.9.6 | Needleleaf | 106 | 24.7 | 23.3 | Price et al. (1997)210 | English |
| 651 | -121.99 | 45.82 | 2000.3.30-2000.12.3 | Needleleaf |  |  | 24 | Pypker et al. (2005)211 | English |
| 652 | -121.99 | 45.82 | 2002.6.17-2002.11.22 | Needleleaf | 418.73 | 88.31 | 21.09 | Pypker et al. (2005) | English |
| 653 | 109.36 | 36.86 | 2018.6.1-2018.8.31 | Broadleaf | 428.5 | 96.97 | 22.63 | Qiao (2019)212 | Chinese |
| 654 | 109.35 | 36.87 | 2018.6.1-2018.8.31 | Broadleaf | 428.5 | 79.7 | 18.6 | Qiao (2019)212 | Chinese |
| 655 | 109.35 | 36.85 | 2018.6.1-2018.8.31 | Broadleaf | 428.5 | 51.81 | 12.09 | Qiao (2019)212 | Chinese |
| 656 | 75.87 | 11.25 | 1983.1.1-1984.12.31 | Broadleaf | 629.1 | 193.4 | 30.74 | Rao (1987)213 | English |
| 657 | 4.16 | 42.33 | 1988.1.1-1990.12.31 | Broadleaf | 4393.5 | 1318.5 | 30 | Regina and Tarazona. (2000)214 | English |
| 658 | 4.16 | 42.33 | 1988.1.1-1990.12.31 | Broadleaf | 3760.8 | 1803.9 | 47.9 | Regina and Tarazona. (2000)214 | English |
| 659 | -123.73 | 39.35 | 2000.12.1-2001.5.27 | Mixed | 726 | 190.94 | 26.3 | Reid and Lewis (2009)215 | English |
| 660 | -123.73 | 39.35 | 1999.12.1-2000.11.30 | Mixed | 1213 | 278.99 | 23 | Reid and Lewis (2009)215 | English |
| 661 | -123.73 | 39.35 | 1998.12.5-2001.5.27 | Mixed | 2963 | 663.71 | 22.4 | Reid and Lewis (2009)215 | English |
| 662 | -123.73 | 39.35 | 1998.12.5-1999.11.30 | Mixed | 1024 | 194.56 | 19 | Reid and Lewis (2009)215 | English |
| 663 | 117.65 | 27.75 | 2004.1.1-2004.12.31 | Broadleaf | 1304.9 | 217.5 | 12.3 | Ren and Xue (2008)216 | Chinese |
| 664 | 108.14 | 22.62 | 2016.2.1-2016.2.28 | Broadleaf | 25 | 25 | 100 | Ren et al. (2017)217 | Chinese |
| 665 | 108.14 | 22.62 | 2016.3.1-2016.3.31 | Broadleaf | 32 | 26 | 82 | Ren et al. (2017)217 | Chinese |
| 666 | 108.14 | 22.62 | 2015.10.1-2015.10.31 | Broadleaf | 64 | 32 | 49 | Ren et al. (2017)217 | Chinese |
| 667 | 108.14 | 22.62 | 2015.11.1-2015.11.30 | Broadleaf | 99 | 38 | 38 | Ren et al. (2017)217 | Chinese |
| 668 | 108.14 | 22.62 | 2016.1.1-2016.1.31 | Broadleaf | 122 | 42 | 34 | Ren et al. (2017)217 | Chinese |
| 669 | 108.14 | 22.62 | 2015.12.1-2015.12.31 | Broadleaf | 135 | 44 | 32 | Ren et al. (2017)217 | Chinese |
| 670 | 108.14 | 22.62 | 2016.4.1-2016.4.30 | Broadleaf | 144 | 45 | 32 | Ren et al. (2017)217 | Chinese |
| 671 | 108.14 | 22.62 | 2015.7.1-2016.5.31 | Broadleaf | 1532 | 490 | 32 | Ren et al. (2017)217 | Chinese |
| 672 | 108.14 | 22.62 | 2016.5.1-2016.5.31 | Broadleaf | 145 | 46 | 31 | Ren et al. (2017)217 | Chinese |
| 673 | 108.14 | 22.62 | 2015.9.1-2015.9.30 | Broadleaf | 203 | 56 | 27 | Ren et al. (2017)217 | Chinese |
| 674 | 108.14 | 22.62 | 2015.8.1-2015.8.31 | Broadleaf | 256 | 65 | 25 | Ren et al. (2017)217 | Chinese |
| 675 | 108.14 | 22.62 | 2015.7.1-2015.7.31 | Broadleaf | 307 | 73 | 24 | Ren et al. (2017)217 | Chinese |
| 676 | 9.34 | 56.07 | 2011.1.1-2011.12.31 | Needleleaf | 913 | 333.245 | 36.5 | Ringgaard et al. (2014)218 | English |
| 677 | 9.34 | 56.07 | 2010.2.1-2010.12.31 | Broadleaf | 848 | 277.30 | 32.7 | Ringgaard et al. (2014)218 | English |
| 678 | -3.21 | 51.67 | 1989.1.1-1991.12.31 | Broadleaf | 88 | 13.2 | 15 | Robson et al. (1994)219 | English |
| 679 | -44.96 | -21.23 | 2015.1.1-2015.12.31 | Broadleaf | 1060 | 251 | 23.7 | Rodrigues et al. (2021)220 | English |
| 680 | -44.96 | -21.23 | 2018.1.1-2018.12.31 | Broadleaf | 987 | 231 | 23.4 | Rodrigues et al. (2021)220 | English |
| 681 | -44.96 | -21.23 | 2019.1.1-2019.12.31 | Broadleaf | 1178 | 266 | 22.6 | Rodrigues et al. (2021)220 | English |
| 682 | -44.96 | -21.23 | 2016.1.1-2016.12.31 | Broadleaf | 894 | 199 | 22.2 | Rodrigues et al. (2021)220 | English |
| 683 | -44.96 | -21.23 | 2017.1.1-2017.12.31 | Broadleaf | 1078 | 238 | 22.1 | Rodrigues et al. (2021)220 | English |
| 684 | -44.96 | -21.23 | 2013.1.1-2019.12.31 | Broadleaf | 7303 | 1548 | 21.2 | Rodrigues et al. (2021)220 | English |
| 685 | -44.96 | -21.23 | 2014.1.1-2014.12.31 | Broadleaf | 977 | 186 | 19 | Rodrigues et al. (2021)220 | English |
| 686 | -44.96 | -21.23 | 2013.1.1-2013.12.31 | Broadleaf | 1128 | 177 | 15.7 | Rodrigues et al. (2021)220 | English |
| 687 | 114.73 | 36.27 | 2011.7.1-2011.9.30;  2012.7.1-2012.9.30;  2013.7.1-2013.9.30 | Grassland | 810.5 | 85.9 | 10.6 | Ru (2015)221 | Chinese |
| 688 | 114.73 | 36.27 | 2011.7.1-2011.9.30;  2012.7.1-2012.9.30;  2013.7.1-2013.9.30 | Broadleaf | 810.5 | 142.8 | 17.62 | Ru (2015)221 | Chinese |
| 689 | 114.73 | 36.27 | 2011.7.1-2011.9.30;  2012.7.1-2012.9.30;  2013.7.1-2013.9.30 | Broadleaf | 810.5 | 108 | 13.33 | Ru (2015)221 | Chinese |
| 690 | 51.13 | 35.7 | 2011.1.30-2012.1.30 | Needleleaf | 232.5 | 60.84 | 26.17 | Sadeghi et al. (2014)222 | English |
| 691 | 51.13 | 35.7 | 2012.8.23-2013.8.23 | Needleleaf | 275.3 | 75 | 27.24 | Sadeghi et al. (2015)223 | English |
| 692 | 51.13 | 35.7 | 2012.8.23-2013.8.23 | Needleleaf | 275.3 | 66 | 23.97 | Sadeghi et al. (2015)223 | English |
| 693 | 51.13 | 35.7 | 2011.3.16-2014.3.15 | Needleleaf | 730.5 | 164.35 | 22.5 | Sadeghi et al. (2016)224 | English |
| 694 | 51.13 | 35.7 | 2011.3.16-2014.3.15 | Broadleaf | 730.30 | 120.5 | 16.5 | Sadeghi et al. (2016)224 | English |
| 695 | 130.65 | 33.52 | 2010.6.5-2011.12.31 | Needleleaf | 4284 | 1091.91 | 25.5 | Saito et al. (2013)225 | English |
| 696 | -65.83 | 18.3 | 1996.5.5-1996.7.9 | Broadleaf | 852 | 444 | 52.11 | Schellekens et al. (1999)226 | English |
| 697 | -1.53 | 38.06 | 1994.1.1-1995.12.31 | Shrubs | 289.6 | 72.9 | 25.2 | Serrato and Diaz (1998)227 | English |
| 698 | -1.53 | 38.06 | 1994.1.1-1995.12.31 | Shrubs | 289.6 | 96.5 | 33 | Serrato and Diaz (1998)227 | English |
| 699 | -1.53 | 38.06 | 1994.1.1-1995.12.31 | Shrubs | 231.6 | 84.5 | 36.5 | Serrato and Diaz (1998)227 | English |
| 700 | 111.92 | 40.95 | 2006.5.1-2006.9.30 | Needleleaf | 117.04 | 19.9 | 34.1 | Sharen (2009)228 | Chinese |
| 701 | 128.89 | 47.18 | 2007.6.1-2007.6.30 | Needleleaf | 40.6 | 15.62 | 38.47 | Sheng (2009)229 | Chinese |
| 702 | 128.89 | 47.18 | 2007.8.1-2007.8.31 | Needleleaf | 128.8 | 27.06 | 21.01 | Sheng (2009)229 | Chinese |
| 703 | 128.89 | 47.18 | 2007.5.1-2007.5.31 | Needleleaf | 55.6 | 9.67 | 17.39 | Sheng (2009)229 | Chinese |
| 704 | 128.89 | 47.18 | 2007.5.1-2007.9.30 | Needleleaf | 334.3 | 54.39 | 16.72 | Sheng (2009)229 | Chinese |
| 705 | 128.89 | 47.18 | 2007.7.1-2007.7.31 | Needleleaf | 62.8 | 1.51 | 2.4 | Sheng (2009)229 | Chinese |
| 706 | 128.89 | 47.18 | 2007.9.1-2007.9.30 | Needleleaf | 37.4 | 0.53 | 1.42 | Sheng (2009)229 | Chinese |
| 707 | 128.87 | 47.18 | 2010.5.1-2010.9.30 | Needleleaf | 325.2 | 71.6 | 22 | Sheng and Cai (2019)230 | English |
| 708 | 128.87 | 47.18 | 2011.5.1-2011.9.30 | Needleleaf | 409.2 | 89.8 | 21.9 | Sheng and Cai (2019)230 | English |
| 709 | 128.87 | 47.18 | 2005.4.1-2005.9.30 | Needleleaf | 503.05 | 109.19 | 21.71 | Sheng et al. (2009)231 | Chinese |
| 710 | 124.22 | 41.73 | 2005.6.1-2005.8.31;  2006.6.1-2006.8.31;  2007.6.1-2007.8.31;  2008.6.1-2008.8.31 | Needleleaf |  |  | 18.8 | Sheng et al. (2010)232 | Chinese |
| 711 | 122.34 | 52.56 | 2011.7.1-2011.8.31;  2012.7.1-2012.8.31 | Needleleaf | 396.01 | 92.23 | 23.29 | Sheng et al. (2014)233 | Chinese |
| 712 | 126.62 | 45.72 | 2015.8.1-2015.8.31 | Broadleaf | 159.4 | 48.8 | 30.61 | Sheng et al. (2018)234 | Chinese |
| 713 | 126.62 | 45.72 | 2015.6.1-2015.8.31 | Broadleaf | 339.1 | 73.2 | 21.59 | Sheng et al. (2018)234 | Chinese |
| 714 | 126.62 | 45.72 | 2015.7.1-2015.7.31 | Broadleaf | 95.4 | 18.2 | 19.08 | Sheng et al. (2018)234 | Chinese |
| 715 | 126.62 | 45.72 | 2015.6.1-2015.6.30 | Broadleaf | 84.3 | 6.2 | 7.35 | Sheng et al. (2018)234 | Chinese |
| 716 | 126.62 | 45.72 | 2015.5.1-2015.10.31 | Needleleaf | 430.2 | 174.12 | 40.47 | Sheng et al. (2021)235 | Chinese |
| 717 | 116.1 | 40.06 | 2010.6.1-2010.9.30 | Needleleaf | 200.05 | 92.12 | 30.85 | Shi (2011)236 | Chinese |
| 718 | 116.1 | 40.06 | 2010.6.1-2010.9.30 | Broadleaf | 196.78 | 95.92 | 32.12 | Shi (2011)236 | Chinese |
| 719 | 126.62 | 45.72 | 2015.8.1-2015.8.31 | Needleleaf | 159.41 | 47.95 | 30.08 | Shi (2016)237 | Chinese |
| 720 | 126.62 | 45.72 | 2015.6.1-2015.8.31 | Needleleaf | 339.06 | 76 | 22.415 | Shi (2016)237 | Chinese |
| 721 | 126.62 | 45.72 | 2015.7.1-2015.7.31 | Needleleaf | 95.4 | 20.1 | 21.07 | Shi (2016)237 | Chinese |
| 722 | 126.62 | 45.72 | 2015.6.1-2015.6.30 | Needleleaf | 84.31 | 7.95 | 9.43 | Shi (2016)237 | Chinese |
| 723 | 126.62 | 45.72 | 2015.8.1-2015.8.31 | Broadleaf | 159.4 | 73.5 | 46.11 | Shi (2016)237 | Chinese |
| 724 | 126.62 | 45.72 | 2015.7.1-2015.7.31 | Broadleaf | 95.4 | 38.9 | 40.775 | Shi (2016)237 | Chinese |
| 725 | 126.62 | 45.72 | 2015.6.1-2015.8.31 | Broadleaf | 339.09 | 125.7 | 37.07 | Shi (2016)237 | Chinese |
| 726 | 126.62 | 45.72 | 2015.6.1-2015.6.30 | Broadleaf | 84.39 | 13.3 | 15.76 | Shi (2016)237 | Chinese |
| 727 | 106.33 | 35.47 | 2004.6.1-2004.6.30 | Shrubs | 37.15 | 8.725 | 24.37 | Shi et al. (2005)238 | English |
| 728 | 106.33 | 35.47 | 2004.7.1-2004.7.31 | Shrubs | 159.25 | 31.72 | 19.925 | Shi et al. (2005)238 | English |
| 729 | 106.33 | 35.47 | 2004.6.1-2004.9.30 | Shrubs | 478.4 | 73.451 | 15.36 | Shi et al. (2005)238 | English |
| 730 | 106.33 | 35.47 | 2004.9.1-2004.9.30 | Shrubs | 140.05 | 17.78 | 12.69 | Shi et al. (2005)238 | English |
| 731 | 106.33 | 35.47 | 2004.8.1-2004.8.31 | Shrubs | 141.95 | 15.228 | 10.73 | Shi et al. (2005)238 | English |
| 732 | 106.33 | 35.47 | 2004.6.1-2004.6.30 | Needleleaf | 48 | 13.58 | 28.29 | Shi et al. (2005)238 | English |
| 733 | 106.33 | 35.47 | 2004.8.1-2004.8.31 | Needleleaf | 143.3 | 24.82 | 17.32 | Shi et al. (2005)238 | English |
| 734 | 106.33 | 35.47 | 2004.6.1-2004.9.30 | Needleleaf | 510.6 | 83.882 | 16.385 | Shi et al. (2005)238 | English |
| 735 | 106.33 | 35.47 | 2004.7.1-2004.7.31 | Needleleaf | 177.6 | 28.6 | 16.1 | Shi et al. (2005)238 | English |
| 736 | 106.33 | 35.47 | 2004.9.1-2004.9.30 | Needleleaf | 141.7 | 16.88 | 11.92 | Shi et al. (2005)238 | English |
| 737 | 106.33 | 35.47 | 2004.6.1-2004.6.30 | Broadleaf | 47.95 | 8.47 | 17.65 | Shi et al. (2005)238 | English |
| 738 | 106.33 | 35.47 | 2004.7.1-2004.7.31 | Broadleaf | 166.15 | 26.38 | 15.07 | Shi et al. (2005)238 | English |
| 739 | 106.33 | 35.47 | 2004.6.1-2004.9.30 | Broadleaf | 494.2 | 65.3545 | 13.265 | Shi et al. (2005)238 | English |
| 740 | 106.33 | 35.47 | 2004.8.1-2004.8.31 | Broadleaf | 14.18 | 16.742 | 11.96 | Shi et al. (2005)238 | English |
| 741 | 106.33 | 35.47 | 2004.9.1-2004.9.30 | Broadleaf | 13.83 | 13.743 | 10.405 | Shi et al. (2005)238 | English |
| 742 | 106.26 | 35.49 | 2004.6.1-2004.6.30 | Needleleaf | 47.3 | 14.5 | 30.66 | Shi et al. (2009)239 | Chinese |
| 743 | 106.26 | 35.49 | 2005.8.1-2005.8.31 | Needleleaf | 137.2 | 28.5 | 20.77 | Shi et al. (2009)239 | Chinese |
| 744 | 106.26 | 35.49 | 2004.8.1-2004.8.31 | Needleleaf | 164.1 | 29.4 | 17.92 | Shi et al. (2009)239 | Chinese |
| 745 | 106.26 | 35.49 | 2005.9.1-2005.9.30 | Needleleaf | 129.7 | 21.2 | 16.35 | Shi et al. (2009)239 | Chinese |
| 746 | 106.26 | 35.49 | 2004.6.1-2004.9.30 | Needleleaf | 497.6 | 78.6 | 15.8 | Shi et al. (2009)239 | Chinese |
| 747 | 106.26 | 35.49 | 2005.6.1-2005.6.30 | Needleleaf | 37.4 | 5.6 | 14.97 | Shi et al. (2009)239 | Chinese |
| 748 | 106.26 | 35.49 | 2005.6.1-2005.9.30 | Needleleaf | 544 | 77 | 14.15 | Shi et al. (2009)239 | Chinese |
| 749 | 106.26 | 35.49 | 2004.9.1-2004.9.30 | Needleleaf | 131.7 | 16.7 | 12.68 | Shi et al. (2009)239 | Chinese |
| 750 | 106.26 | 35.49 | 2004.7.1-2004.7.31 | Needleleaf | 154.5 | 17.9 | 11.59 | Shi et al. (2009)239 | Chinese |
| 751 | 106.26 | 35.49 | 2005.7.1-2005.7.31 | Needleleaf | 239.7 | 21.8 | 9.09 | Shi et al. (2009)239 | Chinese |
| 752 | 112.48 | 23.02 | 2006.10.1-2006.10.31 | Broadleaf | 3.3 | 0.8 | 25 | Shi et al. (2011) 240 | Chinese |
| 753 | 112.48 | 23.02 | 2007.3.1-2007.3.31 | Broadleaf | 46.7 | 10.2 | 21.8 | Shi et al. (2011) 240 | Chinese |
| 754 | 112.48 | 23.02 | 2006.12.1-2006.12.31 | Broadleaf | 24.6 | 4.2 | 17.1 | Shi et al. (2011) 240 | Chinese |
| 755 | 112.48 | 23.02 | 2006.11.1-2006.11.30 | Broadleaf | 85 | 14.5 | 17 | Shi et al. (2011) 240 | Chinese |
| 756 | 112.48 | 23.02 | 2007.2.1-2007.2.28 | Broadleaf | 59.9 | 9 | 15 | Shi et al. (2011) 240 | Chinese |
| 757 | 112.48 | 23.02 | 2006.9.1-2006.9.30 | Broadleaf | 125.7 | 18.6 | 14.8 | Shi et al. (2011) 240 | Chinese |
| 758 | 112.48 | 23.02 | 2006.8.1-2006.8.31 | Broadleaf | 113.5 | 14.9 | 13.1 | Shi et al. (2011) 240 | Chinese |
| 759 | 112.48 | 23.02 | 2007.4.1-2007.4.30 | Broadleaf | 143.7 | 16.5 | 11.5 | Shi et al. (2011) 240 | Chinese |
| 760 | 112.48 | 23.02 | 2007.5.1-2007.5.31 | Broadleaf | 127.5 | 14.2 | 11.1 | Shi et al. (2011) 240 | Chinese |
| 761 | 112.48 | 23.02 | 2006.5.1-2007.5.31 | Broadleaf | 2016.8 | 215.4 | 10.7 | Shi et al. (2011) 240 | Chinese |
| 762 | 112.48 | 23.02 | 2006.6.1-2006.6.30 | Broadleaf | 558.7 | 54.6 | 9.8 | Shi et al. (2011) 240 | Chinese |
| 763 | 112.48 | 23.02 | 2006.5.1-2006.5.31 | Broadleaf | 361.5 | 32.4 | 9 | Shi et al. (2011) 240 | Chinese |
| 764 | 112.48 | 23.02 | 2007.1.1-2007.1.31 | Broadleaf | 84 | 7 | 8.3 | Shi et al. (2011) 240 | Chinese |
| 765 | 112.48 | 23.02 | 2006.7.1-2006.7.31 | Broadleaf | 282.7 | 18.6 | 6.6 | Shi et al. (2011) 240 | Chinese |
| 766 | 122.34 | 52.56 | 2013.7.1-2013.8.31 | Needleleaf | 183.98 | 35.14 | 19.1 | Shi et al. (2017)241 | Chinese |
| 767 | 133.52 | 33.63 | 2008.6.30-2009.7.14 | Broadleaf | 1636 | 166 | 10.15 | Shinohara et al. (2012)242 | English |
| 768 | 130.52 | 33.63 | 2010.4.7-2010.9.30 | Needleleaf | 1293.5 | 177.3 | 13.71 | Shinohara et al. (2015)243 | English |
| 769 | 130.52 | 33.63 | 2010.10.30-2011.7.22 | Needleleaf | 1360.5 | 107.8 | 7.92 | Shinohara et al. (2015)243 | English |
| 770 | 133.51 | 33.63 | 2008.6.3-2009.7.4 | Arbor | 1618 | 149 | 9.2 | Shinohara et al. (2013)242 | English |
| 771 | 133.51 | 33.63 | 2008.6.3-2009.7.4 | Arbor | 2913 | 357 | 12.2 | Shinohara et al. (2013)242 | English |
| 772 | 133.51 | 33.63 | 2008.6.3-2009.7.4 | Arbor | 2105 | 228 | 10.8 | Shinohara et al. (2013)242 | English |
| 773 | 119.235 | 43.06 | 2014.5.1-2014.9.30 | Shrubs | 246.2 | 54.9 | 22.23 | Shou et al. (2017)244 | English |
| 774 | -59.95 | -2.95 | 1983.9.1-1985.9.30 | Broadleaf | 5492 | 683 | 12.44 | Shuttleworth (1988)245 | English |
| 775 | -84.14 | 10.04 | 2015.7.1-2015.11.30 | Mixed | 1725 | 181.5 | 10.5 | Siles et al. (2010)246 | English |
| 776 | -99.87 | 24.72 | 1996.10.1-1999.6.30 | Needleleaf | 974 | 187 | 19.2 | Silva and Rodríguez (2001)247 | English |
| 777 | -99.87 | 24.72 | 1996.10.1-1999.6.30 | Mixed | 974 | 224 | 23 | Silva and Rodríguez (2001)247 | English |
| 778 | -99.87 | 24.72 | 1996.10.1-1999.6.30 | Broadleaf | 974 | 132 | 13.6 | Silva and Rodríguez (2001)247 | English |
| 779 | 117.84 | 4.98 | 1989.9.1-1989.9.30 | Broadleaf | 3627 | 631.1 | 17.4 | Sinun et al. (1992)248 | English |
| 780 | -78.83 | 45.16 | 2016.5.27-2016.10.21 | Needleleaf | 440.3 | 161 | 37 | Snelgrove et al. (2020)249 | English |
| 781 | -78.83 | 45.16 | 2016.5.27-2016.10.21 | Needleleaf | 440.3 | 221.1 | 50 | Snelgrove et al. (2020)249 | English |
| 782 | -78.83 | 45.16 | 2016.5.27-2016.10.21 | Broadleaf | 440.3 | 127.6 | 29 | Snelgrove et al. (2020)249 | English |
| 783 | -3.16 | 57.16 | 2015.6.1-2015.9.24 | shrubs | 270 | 94.5 | 35 | Soulsby et al. (2017)250 | English |
| 784 | -3.16 | 57.16 | 2015.6.1-2015.9.24 | Needleleaf | 270 | 124.2 | 46 | Soulsby et al. (2017)250 | English |
| 785 | 13.83 | 45.56 | 2000.10.5-2001.9.12 | Broadleaf | 1265 | 341.5 | 26.94 | Sraj et al. (2008)251 | English |
| 786 | 3.82 | 50.97 | 2004.4.25-2004.5.16 | Broadleaf | 30 | 12.8 | 42.66666667 | Staelens et al. (2008)252 | English |
| 787 | 3.82 | 50.97 | 2003.4.25-2003.11.12 | Broadleaf | 328.4 | 111.1 | 33.83069428 | Staelens et al. (2008)252 | English |
| 788 | 3.82 | 50.97 | 2002.5.17-2002.10.31 | Broadleaf | 411.5 | 113.6 | 27.60631835 | Staelens et al. (2008)252 | English |
| 789 | 3.82 | 50.97 | 2002.5.17-2004.5.16 | Broadleaf | 1447.8 | 304.7 | 21.04572455 | Staelens et al. (2008)252 | English |
| 790 | 3.82 | 50.97 | 2003.11.12-2004.4.24 | Broadleaf | 320.4 | 36.1 | 11.26716604 | Staelens et al. (2008)252 | English |
| 791 | 3.82 | 50.97 | 2002.11.1-2003.4.24 | Broadleaf | 357.5 | 31.1 | 8.699300699 | Staelens et al. (2008)252 | English |
| 792 | 110.47 | 31.31 | 2014.5.1-2014.10.31 | Broadleaf | 1574 | 222.5 | 14.33 | Su et al. (2016)253 | English |
| 793 | 125.41 | 43.01 | 2013.9.1-2013.9.30 | Needleleaf | 23.87 | 10.62 | 44.49 | Sui et al. (2015)254 | Chinese |
| 794 | 125.41 | 43.01 | 2013.5.1-2013.5.31 | Needleleaf | 42.9 | 15.75 | 36.71 | Sui et al. (2015)254 | Chinese |
| 795 | 125.41 | 43.01 | 2013.8.1-2013.8.31 | Needleleaf | 201.66 | 51.58 | 25.58 | Sui et al. (2015)254 | Chinese |
| 796 | 125.41 | 43.01 | 2013.5.1-2013.9.30 | Needleleaf | 530.15 | 134.25 | 25.32 | Sui et al. (2015)254 | Chinese |
| 797 | 125.41 | 43.01 | 2013.6.1-2013.6.30 | Needleleaf | 92.57 | 21.82 | 23.57 | Sui et al. (2015)254 | Chinese |
| 798 | 125.41 | 43.01 | 2013.7.1-2013.7.31 | Needleleaf | 169.15 | 34.48 | 20.38 | Sui et al. (2015)254 | Chinese |
| 799 | 125.41 | 43.01 | 2013.9.1-2013.9.30 | Broadleaf | 23.87 | 11.7 | 49.02 | Sui et al. (2015)254 | Chinese |
| 800 | 125.41 | 43.01 | 2013.5.1-2013.5.31 | Broadleaf | 42.9 | 15.85 | 36.95 | Sui et al. (2015)254 | Chinese |
| 801 | 125.41 | 43.01 | 2013.8.1-2013.8.31 | Broadleaf | 201.66 | 62.66 | 31.07 | Sui et al. (2015)254 | Chinese |
| 802 | 125.41 | 43.01 | 2013.5.1-2013.9.30 | Broadleaf | 530.15 | 158 | 29.8 | Sui et al. (2015)254 | Chinese |
| 803 | 125.41 | 43.01 | 2013.6.1-2013.6.30 | Broadleaf | 92.57 | 25.26 | 27.29 | Sui et al. (2015)254 | Chinese |
| 804 | 125.41 | 43.01 | 2013.7.1-2013.7.31 | Broadleaf | 169.15 | 42.53 | 25.14 | Sui et al. (2015)254 | Chinese |
| 805 | 100.28 | 38.4 | 2009.7.1-2009.7.31 | Needleleaf | 106.39 | 32.72 | 61.5 | Sun (2010)255 | Chinese |
| 806 | 100.28 | 38.4 | 2009.6.1-2009.6.30 | Needleleaf | 55.04 | 21.17 | 38.45 | Sun (2010)255 | Chinese |
| 807 | 100.28 | 38.4 | 2009.6.1-2009.9.30 | Needleleaf | 290.52 | 865.2 | 32.405 | Sun (2010)255 | Chinese |
| 808 | 100.28 | 38.4 | 2009.9.1-2009.9.30 | Needleleaf | 56.38 | 17.51 | 31.05 | Sun (2010)255 | Chinese |
| 809 | 100.28 | 38.4 | 2009.8.1-2009.8.31 | Needleleaf | 72.71 | 22.8 | 30.55 | Sun (2010)255 | Chinese |
| 810 | 102 | 29.7 | 2009.5.1-2009.10.31 | Needleleaf | 1429 | 406.87 | 28.47 | Sun et al. (2013)256 | English |
| 811 | 139.88 | 36.83 | 2011.7.1-2011.10.31 | Needleleaf | 880.8 | 221.8 | 25.18 | Sun et al. (2014)257 | English |
| 812 | 127.5 | 45.33 | 2012.5.1-2012.10.31 | Broadleaf | 567.1 | 75.55 | 13.32 | Sun et al. (2014b)258 | Chinese |
| 813 | 139.6 | 36.37 | 2010.11.1-2011.10.31 | Needleleaf | 1444.6 | 414.8 | 28.71 | Sun et al. (2015)259 | English |
| 814 | 139.6 | 36.37 | 2011.11.1-2012.10.31 | Needleleaf | 1266.8 | 263 | 20.76 | Sun et al. (2015)259 | English |
| 815 | 113.3 | 28.4 | 2017.5.1-2019.4.30 | Broadleaf | 1771 | 511.82 | 28.90005647 | Sun et al. (2022)260 | English |
| 816 | 135.54 | 37.49 | 2008.7.19-2010.7.18 | Needleleaf | 883 | 277.3 | 31.4 | Swaffer et al. (2014)261 | English |
| 817 | 135.54 | 37.49 | 2008.7.19-2010.7.18 | Broadleaf | 883 | 273 | 30.9 | Swaffer et al. (2014)261 | English |
| 818 | 131.3 | 31.85 | 2005.3.1-2006.2.28 | Needleleaf | 3011 | 469 | 15.57 | Takagi (2013)262 | English |
| 819 | 10.6 | 59.9 | 1993.6.1-1993.9.30;  1994.6.1-1994.9.30 | Needleleaf | 587.4 | 156.5 | 26.64 | Tallaksen et al. (1996)263 | English |
| 820 | -47.94 | -15.96 | 2015.10.1-2016.2.29 | Broadleaf | 687.8 | 169.9 | 24.7 | Távora and Koide(2020)264 | English |
| 821 | 122.28 | 53.39 | 2013.5.15-2013.10.1 | Broadleaf | 465.8 | 60.76 | 13.04 | Tian (2014)265 | Chinese |
| 822 | 100.25 | 38.53 | 2008.6.12-2008.10.8 | Needleleaf | 280.43 | 64.5 | 23 | Tian et al. (2012)266 | Chinese |
| 823 | 107.5 | 37.83 | 2016.8.1-2016.10.31;  2017.7.1-2017.8.31 | Shrubs | 251 | 23.8 | 9.48 | Tian et al. (2019)267 | Chinese |
| 824 | 129.83 | 62.815 | 2000.5.10-2000.8.25 | Needleleaf | 126.5 | 36.69 | 29 | Toba and Ohta (2005)268 | English |
| 825 | 129.83 | 62.814 | 2000.5.10-2000.8.25 | Needleleaf | 126.5 | 45.54 | 36 | Toba and Ohta (2005)268 | English |
| 826 | 140.85 | 39.84 | 2000.5.1-2000.9.30 | Needleleaf | 931.4 | 121.08 | 13 | Toba and Ohta (2005)268 | English |
| 827 | 140.85 | 39.84 | 2000.5.1-2000.9.30 | Needleleaf | 931.4 | 158.33 | 17 | Toba and Ohta (2005)268 | English |
| 828 | 140.85 | 39.84 | 2000.5.1-2000.9.30 | Needleleaf | 931.4 | 130.4 | 14 | Toba and Ohta (2005)268 | English |
| 829 | 137.81 | 35.81 | 2003.8.1-2003.10.25 | Broadleaf | 442 | 106.08 | 24 | Toba and Ohta (2005)268 | English |
| 830 | 136.85 | 35.89 | 2001.8.1-2001.10.31 | Broadleaf | 721.5 | 129.87 | 18 | Toba and Ohta (2005)268 | English |
| 831 | 106.15 | 35.97 | 2011.5.1-2011.9.30;  2012.5.1-2012.9.30;  2013.5.1-2013.9.30 | Needleleaf | 1371.6 | 241.2 | 17.59 | Tu et al. (2021)269 | English |
| 832 | -8.6 | 38.63 | 1992.1.4-1994.9.30 | Needleleaf | 1366.2 | 233.7 | 17.11 | Valente et al. (1997)270 | English |
| 833 | -8.6 | 38.63 | 1992.1.4-1994.9.30 | Broadleaf | 1545.8 | 166.8 | 10.79 | Valente et al. (1997)270 | English |
| 834 | 108.07 | -7.05 | 1995.1.8-1995.5.11 | Herbaceous plant | 1577 | 284 | 18.01 | Van Dijk and Bruijnzeel (2001)271 | English |
| 835 | 108.07 | -7.05 | 1999.1.2-1999.7.17 | Herbaceous plant | 1642 | 132 | 8.04 | Van Dijk and Bruijnzeel (2001)271 | English |
| 836 | -75.85 | 39.7 | 2007.11.1-2011.3.31 | Broadleaf |  |  | 26 | Van Stan et al. (2014)272 | English |
| 837 | -81.56 | 32.49 | 2015.9.7-2016.9.12 | Needleleaf | 1528 | 524.4 | 35.5 | Van Stan et al. (2017)273 | English |
| 838 | 114 | -0.06 | 2002.6.14-2003.6.13 | Broadleaf | 2995 | 471 | 15.72 | Vernimmen et al. (2007)274 | English |
| 839 | 7.2 | 48.2 | 1990.5.7-1990.11.5 | Needleleaf | 539.3 | 211.95 | 39.3 | Viville et al. (1993)275 | English |
| 840 | 7.2 | 48.2 | 1988.5.24-1988.11.2 | Needleleaf | 583 | 199.39 | 34.2 | Viville et al. (1993)275 | English |
| 841 | 7.2 | 48.2 | 1989.4.24-1989.10.16 | Needleleaf | 588.3 | 183.55 | 31.2 | Viville et al. (1993)275 | English |
| 842 | 145.43 | -16.13 | 2001.8.25-2004.1.31 | Broadleaf | 4037 | 999 | 24.7 | Wallace and Mcjannet (2006)276 | English |
| 843 | 145.5 | -17.45 | 2000.11.30-2004.6.30 | Broadleaf | 10724 | 3858 | 35.97538232 | Wallace and McJannet (2008)277 | English |
| 844 | 145.27 | -16.53 | 2001.7.13-2004.6.30 | Broadleaf | 9131 | 2599 | 28.46347607 | Wallace and McJannet (2008)277 | English |
| 845 | 145.28 | -16.53 | 2000.12.21-2004.6.30 | Broadleaf | 12812 | 3164 | 24.69559788 | Wallace and McJannet (2008)277 | English |
| 846 | 145.44 | -16.14 | 2001.6.22-2004.6.30 | Broadleaf | 8863 | 1979 | 22.32878258 | Wallace and McJannet (2008)277 | English |
| 847 | 145.42 | -16.19 | 2001.11.9-2004.6.30 | Broadleaf | 7155 | 1581 | 22.09643606 | Wallace and McJannet (2008)277 | English |
| 848 | 110.93 | 30.83 | 2006.6.1-2006.8.31 | Needleleaf | 261.25 | 47.13 | 18.04 | Wan (2007)278 | Chinese |
| 849 | 110.93 | 30.83 | 2006.6.1-2006.8.31 | Mixed | 261.25 | 50.6 | 19.37 | Wan (2007)278 | Chinese |
| 850 | 110.93 | 30.83 | 2006.6.1-2006.8.31 | Broadleaf | 261.25 | 55.58 | 21.28 | Wan (2007)278 | Chinese |
| 851 | 100.29 | 38.57 | 2015.5.1-2015.9.30 | Needleleaf | 367.65 | 90 | 24.48 | Wan et al. (2016)279 | Chinese |
| 852 | 100.28833 | 38.56631 | 2014.6.1-2014.9.30 | Shrubs | 372.27 | 148 | 39.55 | Wan et al. (2016b)280 | Chinese |
| 853 | 88.17 | 43.87 | 2008.4.1-2008.8.31 | Needleleaf | 390 | 155.6 | 39.9 | Wang (2009)281 | Chinese |
| 854 | 83.27 | 43.41 | 2010.4.1-2010.6.30 | Needleleaf | 298.68 | 94.03 | 31.48 | Wang (2013)282 | Chinese |
| 855 | 117.3 | 41.94 | 2016.6.1-2016.9.30 | Broadleaf | 125.56 | 35.4 | 28.2 | Wang (2018)283 | Chinese |
| 856 | 107.68 | 35.23 | 2013.5.1-2013.9.30;  2014.5.1-2014.9.30;  2015.5.1-2015.9.30;  2016.5.1-2016.9.30 | Herbaceous plant | 1310.6 | 118.2 | 9.02 | Wang and Wang (2020)284 | English |
| 857 | 101.2 | 21.95 | 2003.1.1-2003.12.31 | Broadleaf | 1244.4 | 262.7 | 21.1 | Wang et al. (2006)285 | Chinese |
| 858 | 110.15 | 37.55 | 2009.5.1-2009.10.31 | Broadleaf | 366.9 | 39.2 | 10.68 | Wang et al. (2012)286 | Chinese |
| 859 | 109.46 | 36.5 | 2006.5.1-2006.10.31 | Broadleaf | 352.87 | 30.21 | 8.56 | Wang et al. (2013)287 | English |
| 860 | 107.26 | 37.04 | 2019.8.1-2019.10.31;  2020.5.1-2020.9.30 | Shrubs | 280.4 | 35.17 | 18.8 | Wang et al. (2021)288 | Chinese |
| 861 | 114.68 | 40.82 | 2017.5.1-2017.5.31 | Needleleaf | 28.45 | 13.76 | 48.37 | Wang et al. (2022)289 | Chinese |
| 862 | 114.68 | 40.82 | 2017.9.1-2017.9.30 | Needleleaf | 18.8 | 5.9 | 31.38 | Wang et al. (2022)289 | Chinese |
| 863 | 114.68 | 40.82 | 2017.5.1-2017.9.30 | Needleleaf | 240.28 | 68.9 | 28.67 | Wang et al. (2022)289 | Chinese |
| 864 | 114.68 | 40.82 | 2017.8.1-2017.8.31 | Needleleaf | 82.8 | 22.82 | 27.56 | Wang et al. (2022)289 | Chinese |
| 865 | 114.68 | 40.82 | 2017.7.1-2017.7.31 | Needleleaf | 49.02 | 12.16 | 24.81 | Wang et al. (2022)289 | Chinese |
| 866 | 114.68 | 40.82 | 2017.6.1-2017.6.30 | Needleleaf | 61.21 | 14.26 | 23.3 | Wang et al. (2022)289 | Chinese |
| 867 | 177.45 | -18 | 1990.1.4-1990.11.13 | Needleleaf |  |  | 18.53 | Waterloo et al. (1999)290 | English |
| 868 | 177.45 | -18 | 1990.1.4-1990.11.13 | Grassland |  |  | 4.53 | Waterloo et al. (1999)290 | English |
| 869 | 120.08 | 41.37 | 2003.6.1-2003.6.30 | Shrubs | 214.7 | 79.84 | 37.19 | Wei and Wu (2006)291 | Chinese |
| 870 | 120.08 | 41.37 | 2002.6.1-2002.6.30 | Shrubs | 235.2 | 81.2 | 34.5 | Wei and Wu (2006)291 | Chinese |
| 871 | 120.08 | 41.37 | 2004.6.1-2004.6.30 | Shrubs | 266.9 | 67.12 | 25.15 | Wei and Wu (2006)291 | Chinese |
| 872 | 120.08 | 41.37 | 2002.6.1-2002.6.30 | Needleleaf | 235.2 | 65.1 | 27.68 | Wei and Wu (2006)291 | Chinese |
| 873 | 120.08 | 41.37 | 2003.6.1-2003.6.30 | Needleleaf | 214.7 | 57.4 | 26.73 | Wei and Wu (2006)291 | Chinese |
| 874 | 120.08 | 41.37 | 2004.6.1-2004.6.30 | Needleleaf | 266.9 | 43.9 | 16.45 | Wei and Wu (2006)291 | Chinese |
| 875 | -3.6 | 50.63 | 1994.12.8-1995.2.6 | Needleleaf | 382 | 203 | 53.14 | Whelan and Anderson(1996)292 | English |
| 876 | 176.27 | -38.17 | 1983.1.1-1985.12.31 | Needleleaf | 1623 | 268 | 16.51 | Whitehead and Kelliher (1991)293 | English |
| 877 | -64.28 | -31.15 | 2015.1.1-2016.10.31 | Broadleaf | 896.7 | 241.21 | 26.9 | Whitworth-Hulse et al. (2020)294 | English |
| 878 | 121.51 | 50.83 | 2006.6.1-2006.6.30 | Needleleaf | 21.65 | 4.83 | 22.31 | Wu et al. (2006)295 | Chinese |
| 879 | 121.51 | 50.83 | 2006.9.1-2006.9.30 | Needleleaf | 51.1 | 8.95 | 17.51 | Wu et al. (2006)295 | Chinese |
| 880 | 121.51 | 50.83 | 2006.8.1-2006.8.31 | Needleleaf | 72.44 | 11.87 | 16.39 | Wu et al. (2006)295 | Chinese |
| 881 | 121.51 | 50.83 | 2006.6.1-2006.9.30 | Needleleaf | 262.19 | 40.25 | 15.35 | Wu et al. (2006)295 | Chinese |
| 882 | 121.51 | 50.83 | 2006.7.1-2006.7.31 | Needleleaf | 117 | 14.6 | 12.48 | Wu et al. (2006)295 | Chinese |
| 883 | 116.47 | 39.9 | 2010.4.1-2010.10.31 | Shrubs | 512 | 143.1 | 27.91 | Wu et al. (2013)296 | Chinese |
| 884 | 116.47 | 39.9 | 2010.4.1-2010.10.31 | Needleleaf | 512 | 167 | 32.56 | Wu et al. (2013)296 | Chinese |
| 885 | 116.47 | 39.9 | 2010.4.1-2010.10.31 | Broadleaf | 512 | 57.8 | 11.27 | Wu et al. (2013)296 | Chinese |
| 886 | 128.97 | 47.09 | 2010.5.1-2010.9.30 | Needleleaf | 509.5 | 213.48 | 27.93 | Xia (2016)297 | Chinese |
| 887 | 128.97 | 47.09 | 2010.5.1-2010.9.30 | Mixed | 509.5 | 120.55 | 23.66 | Xia (2016)297 | Chinese |
| 888 | 128.97 | 47.09 | 2010.5.1-2010.9.30 | Broadleaf | 509.5 | 83.74 | 32.87 | Xia (2016)297 | Chinese |
| 889 | 116.81 | 40.5 | 2006.9.1-2006.9.30 | Needleleaf | 13.27 | 7.74 | 58.35 | Xiao (2008)298 | Chinese |
| 890 | 116.81 | 40.5 | 2005.5.1-2005.5.31 | Needleleaf | 22.3 | 10.77 | 48.3 | Xiao (2008)298 | Chinese |
| 891 | 116.81 | 40.5 | 2006.10.1-2006.10.31 | Needleleaf | 9.24 | 4.1 | 44.37 | Xiao (2008)298 | Chinese |
| 892 | 116.81 | 40.5 | 2004.9.1-2004.9.30 | Needleleaf | 83.7 | 26.37 | 31.51 | Xiao (2008)298 | Chinese |
| 893 | 116.81 | 40.5 | 2005.8.1-2005.8.31 | Needleleaf | 221 | 64.78 | 29.31 | Xiao (2008)298 | Chinese |
| 894 | 116.81 | 40.5 | 2005.5.1-2005.8.31 | Needleleaf | 555.5 | 144.56 | 26.02 | Xiao (2008)298 | Chinese |
| 895 | 116.81 | 40.5 | 2004.7.1-2004.7.31 | Needleleaf | 150.8 | 39.16 | 25.97 | Xiao (2008)298 | Chinese |
| 896 | 116.81 | 40.5 | 2004.7.1-2004.9.30 | Needleleaf | 514.5 | 131.18 | 25.5 | Xiao (2008)298 | Chinese |
| 897 | 116.81 | 40.5 | 2004.8.1-2004.8.31 | Needleleaf | 280 | 65.65 | 23.45 | Xiao (2008)298 | Chinese |
| 898 | 116.81 | 40.5 | 2006.7.1-2006.7.31 | Needleleaf | 143.63 | 33.33 | 23.21 | Xiao (2008)298 | Chinese |
| 899 | 116.81 | 40.5 | 2005.6.1-2005.6.30 | Needleleaf | 142.2 | 31.83 | 22.38 | Xiao (2008)298 | Chinese |
| 900 | 116.81 | 40.5 | 2005.7.1-2005.7.31 | Needleleaf | 170 | 37.18 | 21.87 | Xiao (2008)298 | Chinese |
| 901 | 116.81 | 40.5 | 2006.7.1-2006.10.31 | Needleleaf | 350.5 | 71.37 | 20.36 | Xiao (2008)298 | Chinese |
| 902 | 116.81 | 40.5 | 2006.8.1-2006.8.31 | Needleleaf | 184.36 | 26.2 | 14.21 | Xiao (2008)298 | Chinese |
| 903 | 116.81 | 40.5 | 2006.9.1-2006.9.30 | Mixed | 13.27 | 4.17 | 31.42 | Xiao (2008)298 | Chinese |
| 904 | 116.81 | 40.5 | 2006.6.1-2006.6.30 | Mixed | 46.65 | 10.8 | 23.15 | Xiao (2008)298 | Chinese |
| 905 | 116.81 | 40.5 | 2006.7.1-2006.7.31 | Mixed | 177.75 | 30.3 | 17.05 | Xiao (2008)298 | Chinese |
| 906 | 116.81 | 40.5 | 2006.6.1-2006.9.30 | Mixed | 422.03 | 71.47 | 16.93 | Xiao (2008)298 | Chinese |
| 907 | 116.81 | 40.5 | 2006.8.1-2006.8.31 | Mixed | 184.36 | 26.2 | 14.21 | Xiao (2008)298 | Chinese |
| 908 | 128.17 | 26.75 | 1999.1.1-1999.12.31 | Broadleaf | 2231 | 440 | 19.7 | Xu et al. (2005)299 | English |
| 909 | 128.17 | 26.75 | 1998.1.1-2000.12.31 | Broadleaf | 9975 | 1508 | 15.2 | Xu et al. (2005)299 | English |
| 910 | 128.17 | 26.75 | 2000.1.1-2000.12.31 | Broadleaf | 3424 | 517 | 15.1 | Xu et al. (2005)299 | English |
| 911 | 128.17 | 26.75 | 1998.1.1-1998.12.31 | Broadleaf | 4320 | 551 | 12.8 | Xu et al. (2005)299 | English |
| 912 | 130.21 | 43.44 | 2017.5.1-2017.9.30 | Needleleaf | 393.6 | 343.32 | 87.23 | Xu et al. (2019)300 | Chinese |
| 913 | 130.21 | 43.44 | 2017.5.1-2017.9.30 | Broadleaf | 217.4 | 120.17 | 55.28 | Xu et al. (2019)300 | Chinese |
| 914 | 106.26 | 35.49 | 2012.5.19-2012.10.10 | Needleleaf | 428.7 | 180.8 | 42.17 | Xu et al. (2020)301 | English |
| 915 | 106.26 | 35.49 | 2011.5.24-2011.10.20 | Needleleaf | 772.2 | 171.4 | 22.2 | Xu et al. (2020)301 | English |
| 916 | 126.62 | 45.72 | 2015.6.1-2015.8.31 | Needleleaf | 339.1 | 123.8 | 36.51 | Xue et al. (2021)302 | Chinese |
| 917 | 112.9 | 27.83 | 2003.10.1-2003.10.31 | Broadleaf | 25.6 | 15 | 58.59375 | Yan et al. (2005)303 | Chinese |
| 918 | 112.9 | 27.83 | 2004.3.1-2004.3.31 | Broadleaf | 104.5 | 45.4 | 43.44497608 | Yan et al. (2005)303 | Chinese |
| 919 | 112.9 | 27.83 | 2003.9.1-2003.9.30 | Broadleaf | 20.3 | 8.4 | 41.37931034 | Yan et al. (2005)303 | Chinese |
| 920 | 112.9 | 27.83 | 2004.9.1-2004.9.30 | Broadleaf | 22.3 | 8.8 | 39.46188341 | Yan et al. (2005)303 | Chinese |
| 921 | 112.9 | 27.83 | 2004.2.1-2004.2.28 | Broadleaf | 133.3 | 47.7 | 35.78394599 | Yan et al. (2005)303 | Chinese |
| 922 | 112.9 | 27.83 | 2004.1.1-2004.1.31 | Broadleaf | 27.2 | 9.5 | 34.92647059 | Yan et al. (2005)303 | Chinese |
| 923 | 112.9 | 27.83 | 2003.12.1-2003.12.31 | Broadleaf | 29.6 | 10.1 | 34.12162162 | Yan et al. (2005)303 | Chinese |
| 924 | 112.9 | 27.83 | 2003.11.1-2003.11.30 | Broadleaf | 35.4 | 11.6 | 32.76836158 | Yan et al. (2005)303 | Chinese |
| 925 | 112.9 | 27.83 | 2004.8.1-2004.8.31 | Broadleaf | 179.5 | 56.2 | 31.3091922 | Yan et al. (2005)303 | Chinese |
| 926 | 112.9 | 27.83 | 2003.9.1-2004.9.30 | Broadleaf | 1321.4 | 345.7 | 26.16164674 | Yan et al. (2005)303 | Chinese |
| 927 | 112.9 | 27.83 | 2004.7.1-2004.7.31 | Broadleaf | 88.5 | 21.4 | 24.18079096 | Yan et al. (2005)303 | Chinese |
| 928 | 112.9 | 27.83 | 2004.6.1-2004.6.30 | Broadleaf | 133.6 | 25.4 | 19.01197605 | Yan et al. (2005)303 | Chinese |
| 929 | 112.9 | 27.83 | 2004.5.1-2004.5.31 | Broadleaf | 262.3 | 47.9 | 18.2615326 | Yan et al. (2005)303 | Chinese |
| 930 | 112.9 | 27.83 | 2004.4.1-2004.4.30 | Broadleaf | 232.4 | 38.4 | 16.5232358 | Yan et al. (2005)303 | Chinese |
| 931 | 116.81 | 40.5 | 2004.9.1-2004.9.30 | Needleleaf | 10.67 | 5.4 | 50.61 | Yang (2007)304 | Chinese |
| 932 | 116.81 | 40.5 | 2006.5.1-2006.5.31 | Needleleaf | 62.55 | 21.25 | 33.97 | Yang (2007)304 | Chinese |
| 933 | 116.81 | 40.5 | 2004.7.1-2004.7.31 | Needleleaf | 138.24 | 43.6 | 31.54 | Yang (2007)304 | Chinese |
| 934 | 116.81 | 40.5 | 2004.6.1-2004.6.30 | Needleleaf | 78.33 | 24.63 | 31.44 | Yang (2007)304 | Chinese |
| 935 | 116.81 | 40.5 | 2004.5.1-2004.9.30 | Needleleaf | 447.52 | 122.55 | 27.38 | Yang (2007)304 | Chinese |
| 936 | 116.81 | 40.5 | 2004.8.1-2004.8.31 | Needleleaf | 157.73 | 27.67 | 17.54 | Yang (2007)304 | Chinese |
| 937 | 116.81 | 40.5 | 2004.9.1-2004.9.30 | Broadleaf | 13.7 | 5.15 | 37.59 | Yang (2007)304 | Chinese |
| 938 | 116.81 | 40.5 | 2004.6.1-2004.6.30 | Broadleaf | 87.18 | 23.23 | 26.65 | Yang (2007)304 | Chinese |
| 939 | 116.81 | 40.5 | 2004.5.1-2004.9.30 | Broadleaf | 515.63 | 139.47 | 25.03 | Yang (2007)304 | Chinese |
| 940 | 116.81 | 40.5 | 2004.8.1-2004.8.31 | Broadleaf | 185.4 | 46.24 | 24.94 | Yang (2007)304 | Chinese |
| 941 | 116.81 | 40.5 | 2006.5.1-2006.5.31 | Broadleaf | 62.55 | 15.455 | 24.71 | Yang (2007)304 | Chinese |
| 942 | 116.81 | 40.5 | 2004.7.1-2004.7.31 | Broadleaf | 166.8 | 38.96 | 23.36 | Yang (2007)304 | Chinese |
| 943 | 109.24 | 36.75 | 2019.6.1-2019.9.30 | Grassland |  |  | 8.71 | Yang (2020)305 | Chinese |
| 944 | 114.63 | 27.67 | 2012.4.1-2012.6.30 | Needleleaf | 501.396 | 97.87 | 19.52 | Yin (2014)306 | Chinese |
| 945 | 105.9 | 34.12 | 2011.10.1-2011.10.31 | Needleleaf | 63.7 | 15.99 | 25.1 | Yuan et al. (2013)307 | Chinese |
| 946 | 105.9 | 34.12 | 2011.6.1-2011.6.30 | Needleleaf | 73.2 | 18.06 | 24.67 | Yuan et al. (2013)307 | Chinese |
| 947 | 105.9 | 34.12 | 2011.9.1-2011.9.30 | Needleleaf | 205 | 37.43 | 18.26 | Yuan et al. (2013)307 | Chinese |
| 948 | 105.9 | 34.12 | 2011.4.1-2011.10.31 | Needleleaf | 951.3 | 158.18 | 16.63 | Yuan et al. (2013)307 | Chinese |
| 949 | 105.9 | 34.12 | 2011.8.1-2011.8.31 | Needleleaf | 211.9 | 33.25 | 15.69 | Yuan et al. (2013)307 | Chinese |
| 950 | 105.9 | 34.12 | 2011.7.1-2011.7.31 | Needleleaf | 198.6 | 30.3 | 15.26 | Yuan et al. (2013)307 | Chinese |
| 951 | 105.9 | 34.12 | 2011.5.1-2011.5.31 | Needleleaf | 172.2 | 20.49 | 11.9 | Yuan et al. (2013)307 | Chinese |
| 952 | 105.9 | 34.12 | 2011.4.1-2011.4.30 | Needleleaf | 26.8 | 2.67 | 9.96 | Yuan et al. (2013)307 | Chinese |
| 953 | 110.98 | 30.82 | 2017.6.1-2017.10.31 | Needleleaf | 1008.4 | 164.2 | 16.2 | Yuan et al. (2020)308 | Chinese |
| 954 | 120.95 | 42.88333 | 2012.5.1-2012.9.30 | Shrubs | 135.32 | 21.33 | 15.03 | Yue et al. (2013)309 | Chinese |
| 955 | 14.49 | 46.04 | 2014.1.1-2017.6.30 | Needleleaf | 4110 | 1849.5 | 45 | Zabret et al. (2018)310 | English |
| 956 | 14.49 | 46.04 | 2014.1.1-2017.6.30 | Needleleaf | 4110 | 2959.2 | 72 | Zabret et al. (2018)310 | English |
| 957 | 14.49 | 46.04 | 2014.1.1-2017.6.30 | Needleleaf | 4110 | 2753.7 | 67 | Zabret et al. (2018)310 | English |
| 958 | 14.49 | 46.04 | 2014.1.1-2017.6.30 | Broadleaf | 4110 | 2178.3 | 53 | Zabret et al. (2018)310 | English |
| 959 | 14.49 | 46.04 | 2014.1.1-2017.6.30 | Broadleaf | 4110 | 2096.1 | 51 | Zabret et al. (2018)310 | English |
| 960 | 14.49 | 46.04 | 2014.1.1-2017.6.30 | Broadleaf | 4110 | 2712.6 | 66 | Zabret et al. (2018)310 | English |
| 961 | 118.84 | 32.07 | 2010.4.1-2010.9.30 | Broadleaf | 823.8 | 207.95 | 25.24 | Zhai et.al. (2011)311 | Chinese |
| 962 | 106.24 | 35.51 | 2011.5.1-2011.10.31 | Needleleaf | 813 | 181.4 | 22.31 | Zhang (2012)312 | Chinese |
| 963 | 112.4 | 27.85 | 2003.1.1-2003.12.31 | Mixed | 1226 | 184 | 15.01 | Zhang et al. (2006)313b | English |
| 964 | 121.5 | 50.83 | 2004.9.1-2004.9.30 | Needleleaf | 117 | 17.84 | 31.01 | Zhang et al. (2006)314 | Chinese |
| 965 | 121.5 | 50.83 | 2004.6.1-2004.6.30 | Needleleaf | 19.27 | 4.235 | 21.94 | Zhang et al. (2006)314 | Chinese |
| 966 | 121.5 | 50.83 | 2004.8.1-2004.8.31 | Needleleaf | 75.32 | 13.635 | 18.035 | Zhang et al. (2006)314 | Chinese |
| 967 | 121.5 | 50.83 | 2004.6.1-2004.9.30 | Needleleaf | 255.775 | 38.44 | 15.02 | Zhang et al. (2006)314 | Chinese |
| 968 | 121.5 | 50.83 | 2004.7.1-2004.7.31 | Needleleaf | 102.685 | 11.655 | 11.17 | Zhang et al. (2006)314 | Chinese |
| 969 | 129.34 | 45.36 | 2010.6.1-2010.6.30 | Mixed | 22.82 | 5.69 | 24.93 | Zhang et al. (2012)315 | Chinese |
| 970 | 129.34 | 45.36 | 2010.8.1-2010.8.31 | Mixed | 126.8 | 25.54 | 20.14 | Zhang et al. (2012)315 | Chinese |
| 971 | 129.34 | 45.36 | 2010.6.1-2010.8.31 | Mixed | 354.83 | 69.5 | 19.59 | Zhang et al. (2012)315 | Chinese |
| 972 | 129.34 | 45.36 | 2010.7.1-2010.7.31 | Mixed | 205.21 | 38.27 | 18.65 | Zhang et al. (2012)315 | Chinese |
| 973 | 105.03 | 37.53 | 2011.6.1-2011.11.30 | Shrubs | 161.1 | 26.74 | 16.6 | Zhang et al. (2013)316 | English |
| 974 | 105.03 | 37.53 | 2011.6.1-2011.11.30 | Shrubs | 161.1 | 32.22 | 20.4 | Zhang et al. (2013)316 | English |
| 975 | 117.3 | 41.94 | 2013.6.1-2013.10.31 | Mixed | 128.87 | 48.11 | 37.33 | Zhang et al. (2015)317 | Chinese |
| 976 | 117.3 | 41.94 | 2013.6.1-2013.10.31 | Needleleaf | 165.02 | 64.69 | 39.2 | Zhang et al. (2015b)318 | Chinese |
| 977 | 105.033 | 37.533 | 2011.6.26-2011.11.7;  2012.4.11-2012.9.25;  2013.5.15-2013.11.30 | Shrubs | 461.5 | 89.95 | 19.75 | Zhang et al. (2015c)319 | English |
| 978 | 105.033 | 37.533 | 2004.1.1-2006.12.31;  2008.1.1-2010.12.31 | Shrubs |  |  | 23.1 | Zhang et al. (2016)320 | English |
| 979 | 109.51667 | 36.7 | 2015.6.1-2015.9.30 | Shrubs | 116.8 | 25.75 | 22.05 | Zhang et al. (2017)321 | English |
| 980 | 100.01 | 37.59 | 2012.6.1-2012.9.11 | Shrubs | 484.8 | 103.9 | 21.43 | Zhang et al. (2018)322 | English |
| 981 | 124.93 | 11.28 | 2013.6.1-2013.11.7 | Broadleaf | 1113 | 200 | 18 | Zhang et al. (2019)323 | English |
| 982 | 106.87 | 22.04 | 2012.1.1-2012.1.31 | Needleleaf | 49 | 34.1 | 69.5 | Zhang et al. (2021)324 | Chinese |
| 983 | 106.87 | 22.04 | 2012.3.1-2012.3.31 | Needleleaf | 82.2 | 52 | 63.3 | Zhang et al. (2021)324 | Chinese |
| 984 | 106.87 | 22.04 | 2012.10.1-2012.10.31 | Needleleaf | 78.2 | 10.4 | 51.7 | Zhang et al. (2021)324 | Chinese |
| 985 | 106.87 | 22.04 | 2012.4.1-2012.4.30 | Needleleaf | 69 | 33.8 | 49 | Zhang et al. (2021)324 | Chinese |
| 986 | 106.87 | 22.04 | 2012.2.1-2012.2.28 | Needleleaf | 17.4 | 8.2 | 47.3 | Zhang et al. (2021)324 | Chinese |
| 987 | 106.87 | 22.04 | 2012.9.1-2012.9.30 | Needleleaf | 103.4 | 41.4 | 40 | Zhang et al. (2021)324 | Chinese |
| 988 | 106.87 | 22.04 | 2012.7.1-2012.7.31 | Needleleaf | 116 | 45.5 | 39.3 | Zhang et al. (2021)324 | Chinese |
| 989 | 106.87 | 22.04 | 2012.8.1-2012.8.31 | Needleleaf | 401.2 | 157.5 | 39.3 | Zhang et al. (2021)324 | Chinese |
| 990 | 106.87 | 22.04 | 2012.1.1-2012.12.31 | Needleleaf | 1303.6 | 504.6 | 38.7 | Zhang et al. (2021)324 | Chinese |
| 991 | 106.87 | 22.04 | 2012.6.1-2012.6.30 | Needleleaf | 153.7 | 50 | 32.5 | Zhang et al. (2021)324 | Chinese |
| 992 | 106.87 | 22.04 | 2012.5.1-2012.5.31 | Needleleaf | 96.5 | 21.9 | 22.7 | Zhang et al. (2021)324 | Chinese |
| 993 | 106.87 | 22.04 | 2012.11.1-2012.11.30 | Needleleaf | 44.8 | 8.3 | 18.5 | Zhang et al. (2021)324 | Chinese |
| 994 | 106.87 | 22.04 | 2012.12.1-2012.12.31 | Needleleaf | 92.2 | 11.5 | 12.5 | Zhang et al. (2021)324 | Chinese |
| 995 | 102.53 | 37.67 | 2018.6.1-2018.9.30 | Shrubs | 322.5 | 67.62 | 21 | Zhang et al. (2021b)325 | Chinese |
| 996 | 100.88 | 21.91 | 2017.1.1-2017.12.31 | Broadleaf | 1773.7 | 108.33 | 6.11 | Zhang et al. (2022)326 | Chinese |
| 997 | 112.98 | 28.13 | 2011.1.1-2011.1.31 | Broadleaf | 8.5 | 7.1 | 83.53 | Zhao et al. (2013)327 | Chinese |
| 998 | 112.9 | 27.83 | 2011.1.1-2011.1.31 | Broadleaf | 34.8 | 26.6 | 76.44 | Zhao et al. (2013)327 | Chinese |
| 999 | 112.9 | 27.83 | 2011.11.1-2011.11.30 | Broadleaf | 30.3 | 20.9 | 68.98 | Zhao et al. (2013)327 | Chinese |
| 1000 | 112.9 | 27.83 | 2011.12.1-2011.12.31 | Broadleaf | 19.7 | 13.5 | 68.53 | Zhao et al. (2013)327 | Chinese |
| 1001 | 112.9 | 27.83 | 2011.2.1-2011.2.28 | Broadleaf | 55.6 | 36.8 | 66.19 | Zhao et al. (2013)327 | Chinese |
| 1002 | 112.98 | 28.13 | 2011.12.1-2011.12.31 | Broadleaf | 32.8 | 20.4 | 62.2 | Zhao et al. (2013)327 | Chinese |
| 1003 | 112.98 | 28.13 | 2011.2.1-2011.2.28 | Broadleaf | 23.8 | 13.1 | 55.04 | Zhao et al. (2013)327 | Chinese |
| 1004 | 112.98 | 28.13 | 2011.9.1-2011.9.30 | Broadleaf | 66.9 | 27.9 | 41.7 | Zhao et al. (2013)327 | Chinese |
| 1005 | 112.9 | 27.83 | 2011.3.1-2011.3.31 | Broadleaf | 159.3 | 65 | 40.8 | Zhao et al. (2013)327 | Chinese |
| 1006 | 112.98 | 28.13 | 2011.3.1-2011.3.31 | Broadleaf | 110.3 | 43.9 | 39.8 | Zhao et al. (2013)327 | Chinese |
| 1007 | 112.98 | 28.13 | 2011.7.1-2011.7.31 | Broadleaf | 48.6 | 17.9 | 36.83 | Zhao et al. (2013)327 | Chinese |
| 1008 | 112.98 | 28.13 | 2011.4.1-2011.4.30 | Broadleaf | 139.7 | 50.5 | 36.15 | Zhao et al. (2013)327 | Chinese |
| 1009 | 112.98 | 28.13 | 2011.11.1-2011.11.30 | Broadleaf | 50.8 | 17.7 | 34.84 | Zhao et al. (2013)327 | Chinese |
| 1010 | 112.9 | 27.83 | 2011.4.1-2011.4.30 | Broadleaf | 299.8 | 90 | 30.02 | Zhao et al. (2013)327 | Chinese |
| 1011 | 112.98 | 28.13 | 2011.10.1-2011.10.31 | Broadleaf | 107.8 | 32.21 | 29.88 | Zhao et al. (2013)327 | Chinese |
| 1012 | 112.98 | 28.13 | 2011.1.1-2011.12.31 | Broadleaf | 1381.9 | 393.21 | 28.45 | Zhao et al. (2013)327 | Chinese |
| 1013 | 112.9 | 27.83 | 2011.10.1-2011.10.31 | Broadleaf | 117.3 | 30.5 | 26 | Zhao et al. (2013)327 | Chinese |
| 1014 | 112.9 | 27.83 | 2011.1.1-2011.12.31 | Broadleaf | 2028 | 515.8 | 25.43 | Zhao et al. (2013)327 | Chinese |
| 1015 | 112.98 | 28.13 | 2011.5.1-2011.5.31 | Broadleaf | 109.6 | 26 | 23.72 | Zhao et al. (2013)327 | Chinese |
| 1016 | 112.98 | 28.13 | 2011.6.1-2011.6.30 | Broadleaf | 451.2 | 99.5 | 22.05 | Zhao et al. (2013)327 | Chinese |
| 1017 | 112.9 | 27.83 | 2011.5.1-2011.5.31 | Broadleaf | 318.2 | 65.4 | 20.55 | Zhao et al. (2013)327 | Chinese |
| 1018 | 112.9 | 27.83 | 2011.9.1-2011.9.30 | Broadleaf | 190.4 | 37.9 | 19.91 | Zhao et al. (2013)327 | Chinese |
| 1019 | 112.9 | 27.83 | 2011.8.1-2011.8.31 | Broadleaf | 254 | 47.8 | 18.82 | Zhao et al. (2013)327 | Chinese |
| 1020 | 112.98 | 28.13 | 2011.8.1-2011.8.31 | Broadleaf | 231.9 | 37 | 15.96 | Zhao et al. (2013)327 | Chinese |
| 1021 | 112.9 | 27.83 | 2011.7.1-2011.7.31 | Broadleaf | 149.3 | 23.8 | 15.94 | Zhao et al. (2013)327 | Chinese |
| 1022 | 112.9 | 27.83 | 2011.6.1-2011.6.30 | Broadleaf | 399.3 | 57.6 | 14.43 | Zhao et al. (2013)327 | Chinese |
| 1023 | 107.98 | 25.25 | 2008.1.1-2013.12.31 | Broadleaf | 9197.46 | 1487.23 | 16.17 | Zhao et al. (2017)328 | Chinese |
| 1024 | 100.13 | 39.35 | 2016.8.1-2016.8.31;  2017.7.1-2017.7.31;  2020.6.1-2020.9.30 | Shrubs | 90.9 | 9.54 | 10.5 | Zhao et al. (2021)329 | Chinese |
| 1025 | 108.4 | 34.3 | 2015.6.15-2015.10.1;  2016.6.12-2016.10.1 | Herbaceous plant |  |  | 12.5 | Zheng et al. (2018)330 | English |
| 1026 | 108.4 | 34.3 | 2015.6.1-2015.10.30;  2016.6.1-2016.10.30;  2017.6.1-2017.10.30 | Herbaceous plant | 818.4 | 112.9 | 13.8 | Zheng et al. (2019)331 | English |
| 1027 | 113.03 | 28.11 | 2007.10.1-2007.10.31 | Broadleaf | 1.7 | 1.6 | 94.12 | Zhong et al. (2010b)332 | Chinese |
| 1028 | 113.03 | 28.11 | 2007.11.1-2007.11.30 | Broadleaf | 13.9 | 10.66 | 76.69 | Zhong et al. (2010b)332 | Chinese |
| 1029 | 113.03 | 28.11 | 2008.1.1-2008.1.31 | Broadleaf | 9.3 | 6.37 | 68.49 | Zhong et al. (2010b)332 | Chinese |
| 1030 | 113.03 | 28.11 | 2007.7.1-2007.7.31 | Broadleaf | 30.6 | 8.58 | 28.04 | Zhong et al. (2010b)332 | Chinese |
| 1031 | 113.03 | 28.11 | 2007.5.1-2007.5.31 | Broadleaf | 49.4 | 12.83 | 25.97 | Zhong et al. (2010b)332 | Chinese |
| 1032 | 113.03 | 28.11 | 2008.2.1-2008.2.28 | Broadleaf | 35 | 7.78 | 22.23 | Zhong et al. (2010b)332 | Chinese |
| 1033 | 113.03 | 28.11 | 2007.12.1-2007.12.31 | Broadleaf | 63.9 | 12.06 | 18.87 | Zhong et al. (2010b)332 | Chinese |
| 1034 | 113.03 | 28.11 | 2007.5.1-2008.3.31 | Broadleaf | 817.8 | 147.3 | 18.01 | Zhong et al. (2010b)332 | Chinese |
| 1035 | 113.03 | 28.11 | 2007.9.1-2007.9.30 | Broadleaf | 127.2 | 21.97 | 17.27 | Zhong et al. (2010b)332 | Chinese |
| 1036 | 113.03 | 28.11 | 2007.8.1-2007.8.31 | Broadleaf | 199.2 | 34.02 | 17.08 | Zhong et al. (2010b)332 | Chinese |
| 1037 | 113.03 | 28.11 | 2007.6.1-2007.6.30 | Broadleaf | 104 | 14.71 | 14.14 | Zhong et al. (2010b)332 | Chinese |
| 1038 | 113.03 | 28.11 | 2008.3.1-2008.3.31 | Broadleaf | 183.6 | 16.72 | 9.11 | Zhong et al. (2010b)332 | Chinese |
| 1039 | 112.4 | 36.63 | 2011.5.1-2011.9.30 | Needleleaf | 634.79 | 130.34 | 20.39 | Zhou et al. (2013)333 | Chinese |
| 1040 | 102.76 | 23.09 | 2014.7.1-2014.9.30 | Broadleaf | 50.46 | 17.12 | 33.93 | Zong (2015) 334 | Chinese |

**References**

1 Petersen, B. K. *et al.* Deep symbolic regression: Recovering mathematical expressions from data via risk-seeking policy gradients. *International Conference on Learning Representations* (2021). <https://doi.org:10.48550/arXiv.1912.04871>

2 Good, S. P., Moore, G. W. & Miralles, D. G. A mesic maximum in biological water use demarcates biome sensitivity to aridity shifts. *Nature Ecology & Evolution* **1**, 1883-1888 (2017). <https://doi.org:10.1038/s41559-017-0371-8>

3 Dai, Y., Dickinson, R. E. & Wang, Y.-P. A Two-Big-Leaf Model for Canopy Temperature, Photosynthesis, and Stomatal Conductance. *Journal of Climate* **17**, 2281–2299 (2004). <https://doi.org:10.1175/1520-0442(2004)017><2281:ATMFCT>2.0.CO;2

4 Oleson, K. *et al.* Technical description of version 4.0 of the Community Land Model (CLM). *NCAR Technical Note NCAR/TN‐478+STR, 257 pp* (2010).

5 Lawrence, D. M. *et al.* The Community Land Model Version 5: Description of New Features, Benchmarking, and Impact of Forcing Uncertainty. *Journal of Advances in Modeling Earth Systems* **11**, 4245-4287 (2019). <https://doi.org:10.1029/2018ms001583>

6 Wiltshire, A. J. *et al.* JULES-GL7: the Global Land configuration of the Joint UK Land Environment Simulator version 7.0 and 7.2. *Geoscientific Model Development* **13**, 483-505 (2020). <https://doi.org:10.5194/gmd-13-483-2020>

7 Yoshimura, K., Miyazaki, S., Kanae, S. & Oki, T. Iso-MATSIRO, a land surface model that incorporates stable water isotopes. *Global and Planetary Change* **51**, 90-107 (2006). <https://doi.org:10.1016/j.gloplacha.2005.12.007>

8 Hamman, J. J., Nijssen, B., Bohn, T. J., Gergel, D. R. & Mao, Y. The Variable Infiltration Capacity model version 5 (VIC-5): infrastructure improvements for new applications and reproducibility. *Geoscientific Model Development* **11**, 3481-3496 (2018). <https://doi.org:10.5194/gmd-11-3481-2018>

9 He, C. *et al.* Modernizing the open-source community Noah with multi-parameterization options (Noah-MP) land surface model (version 5.0) with enhanced modularity, interoperability, and applicability. *Geoscientific Model Development* **16**, 5131-5151 (2023). <https://doi.org:10.5194/gmd-16-5131-2023>

10 Pastorello, G. *et al.* The FLUXNET2015 dataset and the ONEFlux processing pipeline for eddy covariance data. *Sci Data* **7**, 225 (2020). <https://doi.org:10.1038/s41597-020-0534-3>

11 Beringer, J. *et al.* An introduction to the Australian and New Zealand flux tower network – OzFlux. *Biogeosciences* **13**, 5895-5916 (2016). <https://doi.org:10.5194/bg-13-5895-2016>

12 Aboal, J. R., Jiménez, M. S., Morales, D. & Hernández, J. M. Rainfall interception in laurel forest in the Canary Islands. *Agricultural and Forest Meteorology* **97**, 73-86 (1999). <https://doi.org:10.1016/S0168-1923(99)00083-0>

13 Aherne, J. Modelling soil water fluxes in a Norway spruce (Picea abies (L.) Karst.)stand at Ballyhooly, Co. Cork. **56** (1999).

14 Ahmadi, M. T., Attarod, P. & Bayramzadeh, V. The Role of Rainfall Size in Canopy Interception Loss: An Observational Study in a Typical Beech Forest. *Middle-East Journal of Scientific Research* **13**, 876-882 (2013). <https://doi.org:10.5829/idosi.mejsr.2013.13.7.2721>

15 Ahmadi, M. T., Attarod, P., Mohadjer, M. R. M., Rahmani, R., & Fathi, J. Partitioning rainfall into throughfall, stemflow, and interception loss in an oriental beech (Fagus orientalis Lipsky) forest during the growing season. (2009). <https://doi.org:10.3906/tar-0902-3>

16 Asdak, C., Jarvis, P. G., Gardingen, P. v. & Fraser, A. Rainfall interception loss in unlogged and logged forest areas of Central Kalimantan, Indonesia. *Journal of Hydrology* **206**, 237-244 (1998). <https://doi.org:10.1016/S0022-1694(98)00108-5>

17 Aydin, M., Gunes Sen, S. & Celik, S. Throughfall, stemflow, and interception characteristics of coniferous forest ecosystems in the western black sea region of Turkey (Daday example). *Environ Monit Assess* **190**, 316 (2018). <https://doi.org:10.1007/s10661-018-6657-8>

18 Balestrini, R. & Tagliaferri, A. Atmospheric deposition and canopy exchange processes in alpine forest ecosystems (northern Italy). *Atmospheric Environment* **35**, 6421-6433 (2001). <https://doi.org:10.1016/S1352-2310(01)00350-8>

19 Bao, H., Liu, D., Zhao, P., Zhou, M., Xiang, C., Zeng, N., Wei, J. Rainfall redistribution in natural Betula platyphylla forests in south of Da Xing ' an Mountains. **30** (2016). <https://doi.org:10.13448/j.cnki.jalre.2016.050>

20 Bialkowski, R. & Buttle, J. M. Stemflow and throughfall contributions to soil water recharge under trees with differing branch architectures. *Hydrological Processes* **29**, 4068-4082 (2015). <https://doi.org:10.1002/hyp.10463>

21 Bigelow, S. Evapotranspiration modelled from stands of three broad‐leaved tropical trees in Costa Rica. *Hydrological Processes* **15**, 2779-2796 (2001). <https://doi.org:10.1002/hyp.268>

22 Brantley, S. T., Miniat, C. F. & Bolstad, P. V. Rainfall partitioning varies across a forest age chronosequence in the southernAppalachianMountains. *Ecohydrology* **12** (2019). <https://doi.org:10.1002/eco.2081>

23 Brasil, J. B., Andrade, E. M. d., Palácio, H. A. d. Q., Medeiros, P. H. A. & Santos, J. C. N. d. Characteristics of precipitation and the process of interception in a seasonally dry tropical forest. *Journal of Hydrology: Regional Studies* **19**, 307-317 (2018). <https://doi.org:10.1016/j.ejrh.2018.10.006>

24 Brown, S. M. *et al.* Atmospheric and soil moisture controls on evapotranspiration from above and within a Western Boreal Plain aspen forest. *Hydrological Processes* **28**, 4449-4462 (2014). <https://doi.org:10.1002/hyp.9879>

25 Bryant, M. L., Bhat, S. & Jacobs, J. M. Measurements and modeling of throughfall variability for five forest communities in the southeastern US. *Journal of Hydrology* **312**, 95-108 (2005). <https://doi.org:10.1016/j.jhydrol.2005.02.012>

26 Bulcock, H. H. & Jewitt, G. P. W. Modelling canopy and litter interception in commercial forest plantations in South Africa using the Variable Storage Gash model and idealised drying curves. *Hydrology and Earth System Sciences* **16**, 4693-4705 (2012). <https://doi.org:10.5194/hess-16-4693-2012>

27 Buttle, J. M. & Farnsworth, A. G. Measurement and modeling of canopy water partitioning in a reforested landscape: The Ganaraska Forest, southern Ontario, Canada. *Journal of Hydrology* **466-467**, 103-114 (2012). <https://doi.org:10.1016/j.jhydrol.2012.08.021>

28 Cai, T., Zhu, D., Sheng, H. Rainfall redistribution in virgin Pinus koaiensis forest and secondary Betual platyphylla forest in Northeast China. *Science of Soil and Water Conservation* **4**, 61-65 (2006). <https://doi.org:10.16843/j.sswc.2006.06.012>

29 Gongxiang, C. Hydrological impact and the slpoe scale effect of the vegetation structure in the Xiangshuihe watershed in Liupan Mountains. (2014).

30 Cao, Y., Huang, Z., OuYang, z., Zheng, H., Wang, X., Miao, H. Eco-hydrological effect of Pinus massoniana canopy and its influence factors in Zhangjiajie of Hunan Province. **42** (2006).

31 Cao, G., Wang, Y., Wang, Y., Xu, L., Ji, M. Effects of thinning intensity on throughfall and stemflow of Larix principis-ruprecitii plantations. (2018). <https://doi.org:10.16843/j.sswc.2018.03.010>

32 Cao, G., Zhao, Y., Duan, X., Xue, Y. Simulation of Canopy Rainfall Interception of the Evergreen Broad-leaved Forest in Mid Subtropical Zone Using the Modified Gash Model. **32** (Cao, G., Zhao, Y., Duan, X., Xue, Y.). <https://doi.org:10.13870/j.cnki.stbcxb.2018.02.053>

33 Cape, J. N., Brown, A. H. F., Robertson, S. M. C., Howson, G., & Paterson, I. S. Interspecies comparisons of throughfall and stemflow at three sites in northern Britain. (1991). <https://doi.org:10.1016/0378-1127(91)90229-O>

34 Carlyle-Moses, D. E. & Price, A. G. An evaluation of the Gash interception model in a northern hardwood stand. *Journal of Hydrology* **214**, 103-110 (1999). <https://doi.org:10.1016/S0022-1694(98)00274-1>

35 Carlyle‐Moses, D. E. & Price, A. G. Modelling canopy interception loss from a Madrean pine‐oak stand, northeastern Mexico. *Hydrological Processes* **21**, 2572-2580 (2007). <https://doi.org:10.1002/hyp.6790>

36 Carlyle‐Moses, D. E., Park, A. D. & Cameron, J. L. Modelling rainfall interception loss in forest restoration trials in Panama. *Ecohydrology* **3**, 272-283 (2010). <https://doi.org:10.1002/eco.105>

37 Carlyle-Moses, D. E. Throughfall, stemflow, and canopy interception loss fluxes in a semi-arid Sierra Madre Oriental matorral community. (2004). <https://doi.org:10.1016/S0140-1963(03)00125-3>

38 Certini, G., Ugolini, F. C., Corti, G., & Agnelli, A. Early stages of podzolization under Corsican pine. (1998).

39 Chai, R., Cai, T., Man, X., Wang, H., Guan, J. Simulation of rainfall interception process of primary korean pine forest in Xiaoxing′an Mountains by using the modified Gash model. (2013).

40 Zhiyong, C. Comparison on capability of water holdingand nutrition preserving in artificial hybridforest and second shrub-forest. (2007).

41 Chen, Y.-Y. & Li, M.-H. Quantifying Rainfall Interception Loss of a Subtropical Broadleaved Forest in Central Taiwan. *Water* **8** (2016). <https://doi.org:10.3390/w8010014>

42 Chen, S., Chen, C., Zou, B., Zhang, S., Wang, D., Hou, L. Time lag effects and rainfall redistribution traits of the canopy of natural secondary Pinus tabulaeformis on precipitation in the Qinling Mountains,China. **32** (2012). <https://doi.org:10.5846/stxb201012271854>

43 Chen, L., Zhang, Y., Yu, X., Shi, Y., Huang, Z. Characteristics and Simulation on Canopy Interception of Typical Forest Vegetation in Beijing West Mountain Area. *JOURNAL OF BASIC SCIENCE AND ENGINEERING* **21** (2013). <https://doi.org:10.3969/j.issn.1005-0930.2013.03.004>

44 Chen, S. *et al.* Application of Gash analytical model and parameterized Fan model to estimate canopy interception of a Chinese red pine forest. *Journal of Forest Research* **18**, 335-344 (2017). <https://doi.org:10.1007/s10310-012-0364-z>

45 Ranran, C. Eco-hydrologica Processes in two Typica Natural Forests andArtificial Forests in the Loess Hilly Region of China. (2020).

46 Cuartas, L. A. *et al.* Interception water-partitioning dynamics for a pristine rainforest in Central Amazonia: Marked differences between normal and dry years. *Agricultural and Forest Meteorology* **145**, 69-83 (2007). <https://doi.org:10.1016/j.agrformet.2007.04.008>

47 Czikowsky, M. J. & Fitzjarrald, D. R. Detecting rainfall interception in an Amazonian rain forest with eddy flux measurements. *Journal of Hydrology* **377**, 92-105 (2009). <https://doi.org:10.1016/j.jhydrol.2009.08.002>

48 David, T. S. *et al.* Rainfall interception by an isolated evergreen oak tree in a Mediterranean savannah. *Hydrological Processes* **20**, 2713-2726 (2005). <https://doi.org:10.1002/hyp.6062>

49 DUROCHER, T. J. A. D. M. G. A model to consider the spatial variability of rainfall partitioning within deciduous canopy. I. Model description. *Hydrological Processes* **11**, 1509-1523 (1998). <https://doi.org:10.1002/(SICI)1099-1085(199709)11:11><1525::AID-HYP483>3.0.CO;2-S

50 Dawoe, E. K., Barnes, V. R. & Oppong, S. K. Spatio-temporal dynamics of gross rainfall partitioning and nutrient fluxes in shaded-cocoa (Theobroma cocoa) systems in a tropical semi-deciduous forest. *Agroforestry Systems* (2017). <https://doi.org:10.1007/s10457-017-0108-3>

51 de Queiroz, M. G. *et al.* Partitioning of rainfall in a seasonal dry tropical forest. *Ecohydrology & Hydrobiology* **20**, 230-242 (2020). <https://doi.org:10.1016/j.ecohyd.2020.02.001>

52 Deguchi, A., Hattori, S. & Park, H.-T. The influence of seasonal changes in canopy structure on interception loss: Application of the revised Gash model. *Journal of Hydrology* **318**, 80-102 (2006). <https://doi.org:10.1016/j.jhydrol.2005.06.005>

53 Deng, Y., Jiang, Z., Xu, Y., Yue, X., Li, X., Liang, J. Redistribution of precipitation by vegetation and its ecohydrological effects in a typical epikarst spring catchment. *ＣＡＲＳＯＬＯＧＩＣＡ ＳＩＮＩＣＡ* (2018). <https://doi.org:10.11932/karst20180509>

54 Deng, J. *et al.* Rainfall interception using the revised Gash analytical model for Pinus sylvestris var. mongolica in a semi-humid region of NE China. *Ecological Indicators* **143** (2022). <https://doi.org:10.1016/j.ecolind.2022.109399>

55 Dietz, J., Hölscher, D., Leuschner, C. & Hendrayanto. Rainfall partitioning in relation to forest structure in differently managed montane forest stands in Central Sulawesi, Indonesia. *Forest Ecology and Management* **237**, 170-178 (2006). <https://doi.org:10.1016/j.foreco.2006.09.044>

56 Dolman, A. J. Summer and winter rainfall interception in an oak forest. Predictions with an analytical and a numerical simulation model. *Journal of Hydrology* **90**, 1-9 (1987). <https://doi.org:10.1016/0022-1694(87)90169-7>

57 Renard, K. G. & Freimund, J. R. Using monthly precipitation data to estimate the R-factor in the revised USLE. *Journal of Hydrology* **157** (1994). <https://doi.org:10.1016/0022-1694(94)90110-4>

58 Domingo, F., Sánchez, G., Moro, M. J., Brenner, A. J. & Puigdefábregas, J. Measurement and modelling of rainfall interception by three semi-arid canopies. *Agricultural and Forest Meteorology* **91** (1998). <https://doi.org:10.1016/S0168-1923(98)00068-9>

59 Dong, L., Kang, F., Han, H., Cheng, X., Zhao, J., Song, X. Traits and Influencing Factors of Rainfall Redistribution in Three Types of Forest in Liaoheyuan. *Journal of Soil and Water Conservation* **32** (2018). <https://doi.org:10.13870/j.cnki.stbcxb.2018.04.023>

60 Dong, L. *et al.* Rainfall Partitioning in Chinese Pine (Pinus tabuliformis Carr.) Stands at Three Different Ages. *Forests* **11** (2020). <https://doi.org:10.3390/f11020243>

61 Apeng, D. The hillslope hydrological effect of vegetation and simulationin the small watershed of Diediegou,Liupan Mountains. (2009).

62 Duan, X., Wang, Y., Yu, P., Xiong, W., Xu, L. Rainfall Redistribution and Its Influencing Factors of Typical Forest Vegetation in the Ditch Watershed, Liupan Mountains. *Journal of Soil and Water Conservation* **24** (2010). <https://doi.org:10.13870/j.cnki.stbcxb.2010.05.046>

63 DUNIN, F. X., O'LOUGHLIN, E. M. & REYENGA, W. Interception loss from eucalypt forest: Lysimeter determination of hourly rates for long term evaluation. *Hydrological Processes* **2** (1988). <https://doi.org:10.1002/hyp.3360020403>

64 Duval, T. P. Rainfall partitioning through a mixed cedar swamp and associated C and N fluxes in Southern Ontario, Canada. <https://doi.org:10.1002/hyp.13414>

65 Dykes, A. P. Rainfall interception from a lowland tropical rainforest in Brunei. *Journal of Hydrology* **200**, 260-279 (1997). <https://doi.org:10.1016/S0022-1694(97)00023-1>

66 Xiaoli, F. The influence of vegetation change on slope runoff and sediment in Nanling Xiaokeng Areas. (2016).

67 Fan, J., Oestergaard, K. T., Guyot, A. & Lockington, D. A. Measuring and modeling rainfall interception losses by a native Banksia woodland and an exotic pine plantation in subtropical coastal Australia. *Journal of Hydrology* **515**, 156-165 (2014). <https://doi.org:10.1016/j.jhydrol.2014.04.066>

68 Jiangping, F. A study of structure and functions in a primary Picea likiangensisvar. linzhiensis forest ecosystem in Tibet. (2010).

69 Shumin, F. The study on ecological and hydrological processesof typical plantation in the Loess Plateau. (2016).

70 Fathizadeh, O. A., P., Pypker, T.

Darvishsefat, A.

Zahedi Amiri, G. Seasonal variability of rainfall interception and canopy storage capacity measured under individual oak (Quercus brantii) trees in Western Iran, Journal of Agricultural Science and technology. *Journal of Agricultural Science and technology* **15**, 175-188 (2013).

71 Fathizadeh, O., Hosseini, S. M., Zimmermann, A., Keim, R. F. & Darvishi Boloorani, A. Estimating linkages between forest structural variables and rainfall interception parameters in semi-arid deciduous oak forest stands. *Science of the Total Environment* **601-602**, 1824-1837 (2017). <https://doi.org:10.1016/j.scitotenv.2017.05.233>

72 Feng, Y., Guo, N., Cai, T., Sheng, H., Shi, L., Ju, C. Rainfall Redistribution of Mongolian Oak Plantation in Harbin. *Forest Engineering* **33** (2017).

73 Fernandes, R. P. *et al.* The influence of sugarcane crop development on rainfall interception losses. *Journal of Hydrology* **551**, 532-539 (2017). <https://doi.org:10.1016/j.jhydrol.2017.06.027>

74 Ribeiro Filho, J. C., Lemos Filho, L. C. D. A., dos Santos, J. C., Brasil, J. B., & Palácio, H. A. D. Q. Partitioning of rainfall into throughfall, stemflow, and interception loss in the Brazilian Northeastern Atlantic Forest. *Revista Brasileira de Engenharia Agrícola e Ambiental* **23** (2019). <https://doi.org:10.1590/1807-1929/agriambi.v23n1p21-26>

75 Finch, J. W. & Riche, A. B. Interception losses from Miscanthus at a site in south‐east England—an application of the Gash model. *Hydrological Processes* **24**, 2594-2600 (2010). <https://doi.org:10.1002/hyp.7673>

76 Fleischbein, K. *et al.* Rainfall interception in a lower montane forest in Ecuador: effects of canopy properties. *Hydrological Processes* **19**, 1355-1371 (2005). <https://doi.org:10.1002/hyp.5562>

77 Gash, J. H. C. & Lachaud, C. R. L. G. Estimating sparse forest rainfall interception with an analytical model. *Journal of Hydrology* **170**, 79-86 (1995). <https://doi.org:10.1016/0022-1694(95)02697-N>

78 Gavazzi, M. J. & Wightman, G. S. S. G. M. E. A. T. M. G. Canopy Rainfall Interception Measured over Ten Years in a Coastal Plain Loblolly Pine (Pinus taeda L.) Plantation. *Transactions of the ASABE* **59**, 601-610 (2016). <https://doi.org:10.13031/trans.59.11101>

79 Gerrits, A. M. J., Pfister, L. & Savenije, H. H. G. Spatial and temporal variability of canopy and forest floor interception in a beech forest. *Hydrological Processes* **24**, 3011-3025 (2010). <https://doi.org:10.1002/hyp.7712>

80 Ghimire, C. P., Bruijnzeel, L. A., Lubczynski, M. W. & Bonell, M. Rainfall interception by natural and planted forests in the Middle Mountains of Central Nepal. *Journal of Hydrology* **475**, 270-280 (2012). <https://doi.org:10.1016/j.jhydrol.2012.09.051>

81 Gomez-Peralta, D., Oberbauer, S. F., McClain, M. E. & Philippi, T. E. Rainfall and cloud-water interception in tropical montane forests in the eastern Andes of Central Peru. *Forest Ecology and Management* **255**, 1315-1325 (2008). <https://doi.org:10.1016/j.foreco.2007.10.058>

82 Gong, H., Wang, K., Yang, W., Wang, Q., Zhang, Y. Throughfall and stemflow in a Betula platyphylla forest at the subalpine of Western Sichuan. *Chinese Journal of Ecology* (2004). <https://doi.org:0.13292/j.1000-4890.2004.010>

83 Gong, H., Wang, K., Yang, W., Wang, G., Zhang, Y. Throughfall and Stemflow in a Primary Spruce Forest in the Subalpine of Western Sichuan. *Scientia Silvae Sinicae* **41** (2005).

84 Granier, A., Biron, P. & Lemoine, D. Water balance, transpiration and canopy conductance in two beech stands. *Agricultural and Forest Meteorology* **100**, 291-308 (2000). <https://doi.org:10.1016/S0168-1923(99)00151-3>

85 Mengjiao, G. Forest ecosystem service function assessment of liaoheyuan area. (2016).

86 Chunhua, H. Static water-holding capacity of water conservationforest in upper reach of Ashi river basin. (2008).

87 Han, H., Bai, X., Xu, G., Zhang, B., You, G., Shang, S. Study on water balance of Pinus sylvestris var. mongolica planted forest in Zhanggutai area. *Journal of Liaoning Forestry Science ＆ Technology* (2012).

88 Han, C., Zhang, J., Zhuang, Y., Gu, Z., Liu, X., Zhuang, J. Rainfall redistribution in a Cunninghamia lanceolata forest of the Yangtze River Delta. *Journal of Zhejiang a&f University* (2014). <https://doi.org:10.11833/j.issn.2095-0756.2014.03.015>

89 Han, X., Xu, H., Cai, J., Wang, Y., Dong, L. Comparison of Structure and Hydrological Influence of Three Typical Stands in Loess Hilly Regions of Southern Ningxia. *Journal of Soil and Water Conservation* **32** (2018). <https://doi.org:10.13870/j.cnki.stbcxb.2018.06.028>

90 Chunhua, H. Research on Hydrological and EcologicalFunctions of Forest Ecosystem in upper resch of Ashi river basin. (2012).

91 Hassan, S. M. T., Ghimire, C. P. & Lubczynski, M. W. Remote sensing upscaling of interception loss from isolated oaks: Sardon catchment case study, Spain. *Journal of Hydrology* **555**, 489-505 (2017). <https://doi.org:10.1016/j.jhydrol.2017.08.016>

92 Changqing, H. The Ecohydrological Characteristics of Two TypicalForests in The Upper Reaches of Minjiang River. (2009).

93 Xi, H. Research on the Hydrological Function of the KoelreuteriaPanicullata Plantation System in Manganese Lands of Xiangtan City. (2011).

94 He, S., Li, X., Mo, F., Zhou, B., Gao, G. The water conservation study of typical forest ecosystems in the forest transect of eastern China. (2011). <https://doi.org:10.20103/j.stxb.2011.12.005>

95 He, Z.-B. *et al.* Spatial variability of canopy interception in a spruce forest of the semiarid mountain regions of China. *Agricultural and Forest Meteorology* **188**, 58-63 (2014). <https://doi.org:10.1016/j.agrformet.2013.12.008>

96 Herbst, M., Roberts, J. M., Rosier, P. T. W. & Gowing, D. J. Measuring and modelling the rainfall interception loss by hedgerows in southern England. *Agricultural and Forest Meteorology* **141**, 244-256 (2006). <https://doi.org:10.1016/j.agrformet.2006.10.012>

97 Herbst, M., Rosier, P. T. W., McNeil, D. D., Harding, R. J. & Gowing, D. J. Seasonal variability of interception evaporation from the canopy of a mixed deciduous forest. *Agricultural and Forest Meteorology* **148**, 1655-1667 (2008). <https://doi.org:10.1016/j.agrformet.2008.05.011>

98 Herwitz, S. R., & Levia Jr, D. F. Mid‐winter stemflow drainage frombigtooth aspen (Populus grandidentata Michx.) in central Massachusetts.HydrologicalProcesses. (1997).

99 Hölscher, D., Köhler, L., van Dijk, A. I. J. M. & Bruijnzeel, L. A. The importance of epiphytes to total rainfall interception by a tropical montane rain forest in Costa Rica. *Journal of Hydrology* **292**, 308-322 (2004). <https://doi.org:10.1016/j.jhydrol.2004.01.015>

100 Holwerda, F., Bruijnzeel, L. A., Muñoz-Villers, L. E., Equihua, M. & Asbjornsen, H. Rainfall and cloud water interception in mature and secondary lower montane cloud forests of central Veracruz, Mexico. *Journal of Hydrology* **384**, 84-96 (2010). <https://doi.org:10.1016/j.jhydrol.2010.01.012>

101 Hörmann, G. *et al.* Calculation and simulation of wind controlled canopy interception of a beech forest in Northern Germany. *Agricultural and Forest Meteorology* **79**, 131-148 (1996). <https://doi.org:10.1016/0168-1923(95)02275-9>

102 Hu, K., Wen, S., Zhang, J., Song, L. Hydro-Ecological Effects of Alnus Cremastogyne Burli Plantations in Hilly Red Soil Regions of Northern Hunan Province. *Jour of Fujian Forestry Sci and Tech* **36** (2009). <https://doi.org:10.3969/j.issn.1002-7351.2009.03.007>

103 Hu, P., Lang, M., Wu, H., Guo, N., Cai, T., Sheng, H. Rainfall redistribution characteristics in larch plantation in Harbin city. Journal of Arid Land Resources and Environment. (2018). <https://doi.org:10.13448/j.cnki.jalre.2018.121>

104 Hu, S., Yu, J., Hu, K., Jin, M. Impacts of Chinese Pine (Pinus Tabulaeformis) plantations on rainfall redistribution processes: a case study for the mountainous area of North China. *Acta Ecologica Sinica* (2010). <https://doi.org:10.20103/j.stxb.2010.07.010>

105 Zhiying, H. Study of Hydrological Cycle and Water Balance of Typical Forestsin Beijing Mountainous Area. (2012).

106 Caiyi, H. Dyamic characteristics ofhydro-ecological function andnutrient Dynamic Characteristics in Liquidamba formosana plantation. (2012).

107 Huang, J., Zhang, J., Tao, B. Study on Water Conservation Function of Main Forest Types in Jiangning Small Watershed. *Journal of Soil and Water Conservation* **23** (2009). <https://doi.org:10.13870/j.cnki.stbcxb.2009.01.042>

108 Huang, T., He, K., Wang, X. Relationship between Rainfall Redistribution and Canop Structure of BetulaplatyphyllaCanopy in Datong,Qinghai. *Journal of Northwest Forestry University* **33** (2018). <https://doi.org:10.3969/j.issn.1001-7461.2018.03.01>

109 Huber, A. & Iroumé, A. Variability of annual rainfall partitioning for different sites and forest covers in Chile. *Journal of Hydrology* **248**, 78-92 (2001). <https://doi.org:10.1016/S0022-1694(01)00394-8>

110 Huitao, S., Xiaoxue, W., Yue, J. & Wenhui, Y. Spatial variations of throughfall through secondary succession of evergreen broad‐leaved forests in eastern China. *Hydrological Processes* **26**, 1739-1747 (2011). <https://doi.org:10.1002/hyp.8251>

111 Huo, Z.,   Shao, M. Characteristics of rainfall and crown interception of shrub in wind-water erosion interleaving region of Loess Plateau. *Agricultural Research in the Arid Areas* **23** (2005). <https://doi.org:10.3321/j.issn:1000-7601.2005.05.017>

112 Hutchings, N. J., Milne, R. & Crowther, J. M. Canopy storage capacity and its vertical distribution in a Sitka spruce canopy. *Journal of Hydrology* **104** (1988). <https://doi.org:10.1016/0022-1694(88)90163-1>

113 Iida, S. i. *et al.* Intrastorm scale rainfall interception dynamics in a mature coniferous forest stand. *Journal of Hydrology* **548**, 770-783 (2017). <https://doi.org:10.1016/j.jhydrol.2017.03.009>

114 Iida, S. I., Levia, D. F., Shimizu, A., Shimizu, T., Tamai, K., Nobuhiro, T., ... & Araki, M. Intrastorm scale rainfall interception dynamics in a mature coniferousforest stand. *Journal of Hydrology* (2017). <https://doi.org:10.1016/j.jhydrol.2017.03.009>

115 Jeong, S., Kume, T., Shinohara, Y., Farahnak, M. & Otsuki, K. Application of the Reformulated Gash Analytical Model for Rainfall Interception Loss to Unmanaged High-Density Coniferous Plantations Laden with Dead Branches. *Forests* **13** (2022). <https://doi.org:10.3390/f13050657>

116 Jeong, S., Otsuki, K., Inoue, A., & Shinohara, Y. Marked difference ofrainfall partitioning in an unmanaged coniferous plantation with high stand density. *Journal of Forest Research* (2019). <https://doi.org:10.1016/S0140-1963(03)00125-3>

117 Jeong, S., Otsuki, K., & Farahnak, M. Relationship between standstructures and rainfall partitioning in dense unmanaged Japanese cypress plantations. *Journal of 18Agricultural Meteorology* (2019). <https://doi.org:10.2480/agrmet.D-18-00030>

118 JETTEN, V. G. INTERCEPTION OF TROPICAL RAIN FOREST: PERFORMANCE OF A CANOPY WATER BALANCE MODEL. *Hydrological Processes* **10** (1996). <https://doi.org:10.1002/(SICI)1099-1085(199605)10:5><671::AID-HYP310>3.0.CO;2-A

119 Ji, Y., Cai, T. Canopy interception in original Korean pine forest: measurement and dividual simulation in Xiaoxing'an Mountains, northeastern China. *Journal of Beijing Forestry University* (2015). <https://doi.org:10.13332/> j.1000-1522.20150084

120 Jian, S.-Q., Zhao, C.-Y., Fang, S.-M., Yu, K., Wang, Y., Liu, Y.-Y., Zheng, X.-L., and Peng, S.-Z. Characteristics of rainfall interception by Caragana korshinskii and Hippophae rhamnoides in Loess Plateau of Northwest China. *The Journal of Applied Ecology* **23** (2012). <https://doi.org:10.13287/j.1001-9332.2012.0330>

121 Jian, S., Zhao, C., Fang, S. & Yu, K. Characteristics of Caragana korshinskii and Hippophae rhamnoides stemflow and their significance in soil moisture enhancement in Loess Plateau, China. *Journal of Arid Land* **6**, 105-116 (2013). <https://doi.org:10.1007/s40333-013-0189-4>

122 Haiyan, J. Study on Hydrological Characteristics of ForestEcosystem in Daxing'anling. (2008).

123 Jiang, Z. Effects of Achnatherum Splendens Patchy on Redistribution of Surface Water Flow in Qinghai Lake Watershed. *Bulletin of Soil and Water Conservation* **40** (2020).

124 Johnson, R. C. The interception, throughfall and stemflow in a forest in highland Scotland and the comparison with other upland forests in the UK. *Journal of Hydrology* **118** (1990).

125 Junqueira Junior, J. A. *et al.* Rainfall partitioning measurement and rainfall interception modelling in a tropical semi-deciduous Atlantic forest remnant. *Agricultural and Forest Meteorology* **275**, 170-183 (2019). <https://doi.org:10.1016/j.agrformet.2019.05.016>

126 Kaushal, R., Kumar, A., Alam, N. M., Mandal, D., Jayaparkash, J., Tomar, J. M. S., ...& Chaturvedi, O. P. Effect of different canopy management practices on rainfall partitioning in Morus alba. *Ecological Engineering* **102** (2017). <https://doi.org:10.1016/j.ecoleng.2017.02.029>

127 Kelliher, F. M., Whitehead, D. & Pollock, D. S. Rainfall interception by trees and slash in a young Pinus radiata D. Don stand. *Journal of Hydrology* **131** (1992). <https://doi.org:10.1016/0022-1694(92)90217-J>

128 Kermavnar, J. & Vilhar, U. Canopy precipitation interception in urban forests in relation to stand structure. *Urban Ecosystems* **20**, 1373-1387 (2017). <https://doi.org:10.1007/s11252-017-0689-7>

129 Khan, M. A. Water balance and hydrochemistry of precipitationcomponents in forested ecosystems in the arid zone of Rajasthan, India. *Hydrological Sciences Journal* **44** (1999). <https://doi.org:10.1080/02626669909492214>

130 Klingaman, N. P., Levia, D. F. & Frost, E. E. A Comparison of Three Canopy Interception Models for a Leafless Mixed Deciduous Forest Stand in the Eastern United States. *Journal of Hydrometeorology* **8**, 825-836 (2007). <https://doi.org:10.1175/jhm564.1>

131 Koichiro, K., Yuri, T., Nobuaki, T., & Isamu, K. Generation of stemflowvolume and chemistry in a mature Japanese cypress forest. *Hydrological Processes* (2001). <https://doi.org:10.1002/hyp.250>

132 Xiangfei, K. Study on water balance in small watershed of natural forests in upper of AShe river. (2009).

133 Krämer, I. & Hölscher, D. Rainfall partitioning along a tree diversity gradient in a deciduous old‐growth forest in Central Germany. *Ecohydrology* **2**, 102-114 (2009). <https://doi.org:10.1002/eco.44>

134 Lane, P. N. J. *et al.* Water balance of tropical eucalypt plantations in south-eastern China. *Agricultural and Forest Meteorology* **124**, 253-267 (2004). <https://doi.org:10.1016/j.agrformet.2004.01.015>

135 Lankreijer, H. J. M., Hendriks, M. J. & Klaassen, W. A comparison of models simulating rainfall interception of forests. *Agricultural and Forest Meteorology* **64**, 187-199 (1993). <https://doi.org:10.1016/0168-1923(93)90028-G>

136 Lankreijer, H., Lundberg, A., Grelle, A., Lindroth, A. & Seibert, J. Evaporation and storage of intercepted rain analysed by comparing two models applied to a boreal forest. *Agricultural and Forest Meteorology* **98-99**, 595-604 (1999).

137 Lei, L., Zheng, L., Nong, Y., Liu, S., Li, H., Huang, D. Effects of rainfall characteristics on rainfall partitioning in Castanopsis hystrix plantation. *Chinese Journal of Ecology* **39** (2020). <https://doi.org:10.13292/j.1000-4890.202002.023>

138 Mingxue, L. A study on the restoration of the hydrological functions in thesecond generation Chinese Fir Plantation. (2007).

139 Jia, L. Research on the Rainfall Distribution of Different Forests inBeijing Miyun Reservoir Area. (2012).

140 Zhenhua, L. The evapotranspiration of typical vegetation and the scaleeffect of the hydrologic features in slopes of Diediegouwatershed of Liupan Mountains. (2014).

141 Li, J. a. B., G. Crown interception of apple trees in loess hilly and gully region, Northwest China. *Chinese Journal of Applied Ecology* **24** (2014). <https://doi.org:10.13287/j.1001-9332.2013.0170>

142 Li, Z., Ouyang, Z., Zheng, H., Lin, X., Su, Y. Comparison of rainfall redistribution in two ecosystems in minjiang upper catchments, China. *Journal of Plant Ecology* **30** (2006).

143 Li, J., Zhai, H., Wei, X. Rainfall and its redistribution of Pinus tabulaeformis and Quercus variabilis mixed forests. *JOURNAL OF BEIJING FORESTRY UNIVERSITY* **28** (2006). <https://doi.org:10.13332/j.1000-1522.2006.03.028>

144 Li, Y. e. a. Rainfall interception and stemflow for Caragana microphllain Horqin Sandy Land, northern China. *Acta Prataculturae Sinica* **19** (2010).

145 Li, J., Rao, L., Lu, S., Jin, A. Pine and locust forest on rainfall redistribution in Miyun of Beijing. *Guangdong Agricultural Sciences* (2012). <https://doi.org:10.16768/j.issn.1004-874x.2012.12.061>

146 Li, D., Wang, B., Cai, T., Yin, Z., Ju, C. Rainfall redistribution traits of three main forest types in Dagangshan Mountains of Jiangxi Province. *The journal of applied ecology* **25** (2014). <https://doi.org:10.13287/j.1001-9332.20140530.022>

147 Li, L., Li, X., Jiang, Z., Zhang, S. and Zheng, X. Characteristics and Influence Factors of Throughfall for Artemisia ordosicaShrubs in the Mu Us Sandy Land. *Journal of Desert Research* **34** (2014). <https://doi.org:10.7522/j.issn.1000-694X.2013.00404>

148 Li, Y., Zhang, R., Li, Z., Niu, Y., Zhang, Y. Influence of stand structure of Acer truncatum forest on rainfall redistribution based on modified Gash model. *Journal of Shandong University* **54** (2019). <https://doi.org:10.6040/j.issn.671-9352.0.2018.387>

149 Li, Y., Ma, R., Zhang, Y., Cheng, T., Li, Z., Niu, Y. Simulation of canopy rainfall interception of Platycladus orientalis forest and its mixed forest using the modified Gash model. *Chinese Journal of Ecology* **38** (2019). <https://doi.org:10.13292/j.1000-4890.201905.022>

150 Li, Y., Zhang, C. & Niu, Y. Quantitative accuracy assessment of the revised sparse Gash model using distinct time-step climatic parameters. *Hydrology Research* **52**, 1615-1632 (2021). <https://doi.org:10.2166/nh.2021.085>

151 Liang, W. Simulation of Gash Model to Rainfall Interception of Pinus tabulaeformis. *Forest Systems* **23**, 300-303 (2014). <https://doi.org:10.5424/fs/2014232-03410>

152 Lilienfein, J., & Wilcke, W. Water and element input into native, agri-and silvicultural ecosystems of the Brazilian savanna. *Biogeochemistry* **67** (2004). <https://doi.org:10.1023/B:BIOG.0000015279.48813.9d>

153 Limousin, J.-M., Rambal, S., Ourcival, J.-M. & Joffre, R. Modelling rainfall interception in a mediterranean Quercus ilex ecosystem: Lesson from a throughfall exclusion experiment. *Journal of Hydrology* **357**, 57-66 (2008). <https://doi.org:10.1016/j.jhydrol.2008.05.001>

154 Link, T. E., Unsworth, M. & Marks, D. The dynamics of rainfall interception by a seasonal temperate rainforest. *Agricultural and Forest Meteorology* **124**, 171-191 (2004). <https://doi.org:10.1016/j.agrformet.2004.01.010>

155 Qian, L. Study on Eeo-hydrological Processes of SeveralVegetationTypes in Diediegou Catchmentin the North of Liupan Mountains. (2013).

156 Zhiqin, L. Research on the hydrological-ecological functions of forests in typical small watersheds in the mountainous areas of the Yunnan plateau. (2014).

157 Yong, L. Value Assessment of Forest Ecosystem Services Functionin Jinyun Mountain. (2015).

158 Xi, L. Study on Precipitation Hydro-chemical and Nutrient Import Characteristies of Betula platyphylla Secondary Forests in North of Greater Xing' an Mountains. (2015).

159 Liu, Y., Man, X., Sheng, H. Time lag effects of throughfall in natural Larix gmelinii forest in the north of Great Xing'an Mountains, China. *The journal of applied ecology* **26** (2015). <https://doi.org:10.13287/j.1001-9332.20150812.002>

160 Liu, W., Liu, L., and Zheng, Z. Preliminary study on hydrologic effect of evergreen broad-leaved forest and Pinus yunnanensis forest in central Yunnan. *Acta Phytoecologica et Geobotanica Sinica* **15** (1991).

161 Liu, Y. X., Li, H. J., Li, G. S., and Li, X. Y. A Study on the Interception of Precipitation by the Different Kinds of Forest in the East Mountain Area. (1993).

162 Liu, W. J., Liu, W. Y., Li, J. T., Wu, Z. W. & Li, H. M. Isotope variations of throughfall, stemflow and soil water in a tropical rain forest and a rubber plantation in Xishuangbanna, SW China. *Hydrology Research* **39**, 437-449 (2008). <https://doi.org:10.2166/nh.2008.110>

163 Liu, C., Li, L., Zhao, X., Zhai, H., Huhemuren. Redistribution Effects of Tree Canopy of Larix principis-rupprechtii Plantation on Precipitation in the Upper Stream of Saihanba Area. *Journal of Northwest Forestry College* **26** (2011).

164 Liu, M., Wu, Z., Yang, C., Tao, Z., Xie, G. Canopy interception characteristics of rubber plantation in rainy season of Hainan Island. *Journal of Southern Argiculture* **43** (2012). <https://doi.org:10.3969/j:issn.2095-1191.2012.08.1183>

165 Liu, Y., Alamusa, Cao, J. Characteristics of rainfall partitioning by Pinus sylvestris var. mongolica forest canopy in Horqin Sandy Land,northern China. *Chinese Journal of Ecology* **35** (2016). <https://doi.org:10.13292/j.1000-4890.201608.020>

166 Liu, X., Long, F., Chen, X., Chu, G., Zhang, Q. An assessment of the revised Gash interception model in a monsoon evergreen broadleaved forest in lower subtropical China. *Chinese Journal of Ecology* **35** (2016). <https://doi.org:10.13292/j.1000-4890.201611.036>

167 Liu, Z. *et al.* Characteristics of canopy interception and its simulation with a revised Gash model for a larch plantation in the Liupan Mountains, China. *Journal of Forestry Research* **29**, 187-198 (2017). <https://doi.org:10.1007/s11676-017-0407-6>

168 Livesley, S. J., Baudinette, B., & Glover, D. Rainfall interception and stemflow by eucalypt street trees–The impacts of canopy density and bark type. *Urban Forestry & Urban Greening* **13** (2014). <https://doi.org:10.1016/j.ufug.2013.09.001>

169 Llorens, P. Rainfall interception by a Pinus sylvestris forest patch overgrown in a Mediterranean mountainous abandoned area II. Assessment of the applicability of Gash's analytical model. *Journal of Hydrology* **199**, 346-359 (1997). <https://doi.org:10.1016/S0022-1694(96)03335-5>

170 Lloyd, C. R., Gash, J. H. C., Shuttleworth, W. J. & F, A. d. O. M. The measurement and modelling of rainfall interception by Amazonian rain forest. *Agricultural and Forest Meteorology* **43**, 277-294 (1988). <https://doi.org:10.1016/0168-1923(88)90055-X>

171 Lopes, D. d. C. *et al.* Sparse Gash model applied to seasonal dry tropical forest. *Journal of Hydrology* **590** (2020). <https://doi.org:10.1016/j.jhydrol.2020.125497>

172 Loescher, H. W., Gholz, H. L., Jacobs, J. M. & Oberbauer, S. F. Energy dynamics and modeled evapotranspiration from a wet tropical forest in Costa Rica. *Journal of Hydrology* **315**, 274-294 (2005). <https://doi.org:10.1016/j.jhydrol.2005.03.040>

173 Loustau, D., Berbigier, P. & Granier, A. Interception loss, throughfall and stemflow in a maritime pine stand. II. An application of Gash's analytical model of interception. *Journal of Hydrology* **138**, 469-485 (1992). <https://doi.org:10.1016/0022-1694(92)90131-E>

174 Loustau, D., Berbigier, P., Granier, A., & Moussa, F. E. H. Interception loss, throughfall and stemflow in a maritime pine stand. I. Variability of throughfall and stemflow beneath the pine canopy. *Journal of Hydrology* **138** (1992). <https://doi.org:10.1016/0022-1694(92)90130-N>

175 Xinglong, L. Effect of forest canopy on redistribution of rainfall and thecharacters of litter form on Liupan Mountains. (2008).

176 Xizhi, L. Study on the effect of forest vegetation on hydrologicalprocess on slope in Beijing mountain area. (2013).

177 Ma, Y. e. a. Rainfall Canopy Partitioning and Its Influencing Factors of Riparian Shrub in the Alpine Region. *Journal of Desert Research* **32** (2012).

178 Ma, J., Zhao, X., Wei, C., Liu, X., Wang, L. Distribution of Ｒainfall in Larch Forest in the Nanwenghe Nature Reserve. *Protection Forest Science and Technology* (2015).

179 Ma, G., Mansur, S. Water Conservation Function of Forest Ecosystems in the Upper Tailan River in the Mount Tumor Nature Reserve. *Journal of Soil and Water Conservation* (2017).

180 Ma, J., Liu, X., Jin, M. Characteristics of Rainfall Interception by Shrubs in Xishui Forest District of Qilianshan Mountains. *Research of Soil and Water Conservation* **24** (2017).

181 Ma, C., Li, X., Luo, Y., Shao, M. & Jia, X. The modelling of rainfall interception in growing and dormant seasons for a pine plantation and a black locust plantation in semi-arid Northwest China. *Journal of Hydrology* **577** (2019). <https://doi.org:10.1016/j.jhydrol.2019.06.021>

182 Ma, C., Luo, Y. & Shao, M. Comparative modeling of the effect of thinning on canopy interception loss in a semiarid black locust (Robinia pseudoacacia) plantation in Northwest China. *Journal of Hydrology* **590** (2020). <https://doi.org:10.1016/j.jhydrol.2020.125234>

183 Ma, C., Luo, Y., Shao, M. & Jia, X. Estimation and testing of linkages between forest structure and rainfall interception characteristics of a Robinia pseudoacacia plantation on China’s Loess Plateau. *Journal of Forestry Research* **33**, 529-542 (2021). <https://doi.org:10.1007/s11676-021-01324-w>

184 Manfroi, O. J. *et al.* Comparison of conventionally observed interception evaporation in a 100-m2 subplot with that estimated in a 4-ha area of the same Bornean lowland tropical forest. *Journal of Hydrology* **329**, 329-349 (2006). <https://doi.org:10.1016/j.jhydrol.2006.02.020>

185 Marin, C. T., Bouten, W. & Sevink, J. Gross rainfall and its partitioning into throughfall, stemflow and evaporation of intercepted water in four forest ecosystems in western Amazonia. *Journal of Hydrology* **237**, 40-57 (2000). <https://doi.org:10.1016/S0022-1694(00)00301-2>

186 Mazza, G., Amorini, E., Cutini, A., & Manetti, M. C. The influence ofthinning on rainfall interception by Pinus pinea L. in Mediterranean coastal stands (Castel Fusano—20Rome). *Annals of Forest Science* **68** (2011). <https://doi.org:10.1007/s13595-011-0142-7>

187 McJannet, D., Wallace, J. & Reddell, P. Precipitation interception in Australian tropical rainforests: II. Altitudinal gradients of cloud interception, stemflow, throughfall and interception. *Hydrological Processes* **21**, 1703-1718 (2007). <https://doi.org:10.1002/hyp.6346>

188 Medeiros, A., Araújo, P. H. & Bronstert, J. C. d. Interception measurements and assessment of Gash model performance for a tropical semi-arid region. *Revista Ciência Agronômica* (2009).

189 Michopoulos, P., Baloutsos, G., Nakos, G. & Economou, A. Effects of bulk precipitation pH and growth period on cation enrichment in precipitation beneath the canopy of a beech (Fagus moesiaca) forest stand. *Science of The Total Environment* **281**, 79-85 (2001). <https://doi.org:10.1016/S0048-9697(01)00837-3>

190 Mitchell, P. J., Veneklaas, E., Lambers, H., & Burgess, S. S. Partitioning of evapotranspiration in a semi-arid eucalypt woodland in south-western Australia. *Agricultural and Forest Meteorology* **149** (2009). <https://doi.org:10.1016/j.agrformet.2008.07.008>

191 Fei, M. The Hydrological Effects of Forest/Vegetation and Simulationin the Small Watershed ofHonggou,Liupan Mountains. *Chinese Academy of Forestry* (2009).

192 MO, F., LI, X., He, S., Wang, X. Evaluation of soil and water conservation capacity of different forest types in Dongling Mountain. *Acta Ecologica Sinica* **31** (2011). <https://doi.org:10.20103/j.stxb.2011.17.027>

193 Momolli, D. R., Schumacher, M. V., Viera, M., Ludvichak, A. A., Guimarães, C. C., & Souza, H. P. Incident precipitation partitioning: throughfall, stemflowand canopy interception in Eucalyptus dunnii stand. *Journal of Agricultural Science and technology* **11** (2019). <https://doi.org:10.5539/jas.v11n5p372>

194 MOSELLO, R. *et al.* The chemistry of atmospheric deposition in Italy in the framework of the National Programme for Forest Ecosystems Control (CONECOFOR). *Journal of Limnology* **61**, 77-92 (2002). <https://doi.org:10.4081/jlimnol.2002.s1.77>

195 Murakami, S. Application of three canopy interception models to a young stand of Japanese cypress and interpretation in terms of interception mechanism. *Journal of Hydrology* **342**, 305-319 (2007). <https://doi.org:10.1016/j.jhydrol.2007.05.032>

196 Mużyło, A., Valente, F., Domingo, F. & Llorens, P. Modelling rainfall partitioning with sparse Gash and Rutter models in a downy oak stand in leafed and leafless periods. *Hydrological Processes* **26**, 3161-3173 (2012). <https://doi.org:10.1002/hyp.8401>

197 Návar, J. The performance of the reformulated Gash's interception loss model in Mexico's northeastern temperate forests. *Hydrological Processes* **27**, 1626-1633 (2012). <https://doi.org:10.1002/hyp.9309>

198 Návar, J. & Bryan, R. B. Fitting the analytical model of rainfall interception of Gash to individual shrubs of semi-arid vegetation in northeastern México. *Agricultural and Forest Meteorology* **68**, 133-143 (1994). <https://doi.org:10.1016/0168-1923(94)90032-9>

199 Návar, J., Charles, F. & Jurado, E. Spatial variations of interception loss components by Tamaulipan thornscrub in northeastern Mexico. *Forest Ecology and Management* **124**, 231-239 (1999). <https://doi.org:10.1016/S0378-1127(99)00077-8>

200 Návar, J., Carlyle-Moses, D. E. & M., A. M. Interception loss from the Tamaulipan matorral thornscrub of north-eastern Mexico: an application of the Gash analytical interception loss model. *Journal of Arid Environments* **41**, 1-10 (1999). <https://doi.org:10.1006/jare.1998.0460>

201 Negi, G. C. S., Rikhari, H. C., & Garkoti, S. C. The hydrology of three highaltitude forests in Central Himalaya, India: a reconnaissance study. *Hydrological Processes* **12** (1998). <https://doi.org:10.1002/(SICI)1099-1085(199802)12:2><343::AID-HYP578>3.0.CO;2-L

202 Ouyang, Z., Zhou, X., Luo, J., Tian, Y., Yan, W., Ouyang, S., Yi, H. Studies on the Precipitation Redistribution of Eucommia ulmoides Plantation. *Chinese Agricultural Science Bulletin* **30** (2014).

203 Owens, M. K., Lyons, R. K., & Alejandro, C. L. Rainfall partitioning within semiarid juniper communities: effects of event size and canopycover. *Hydrological Processes* **20** (2006). <https://doi.org:10.1002/hyp.6326>

204 Palán, L. & Křeček, J. Interception and Fog Drip Estimates in Fragmented Mountain Forests. *Environmental Processes* **5**, 727-742 (2018). <https://doi.org:10.1007/s40710-018-0327-2>

205 Pan, L., Tang, W., Shi, Y., Wang, Z., Zhu, M., Wang, Y. Study on hydrological effects of P. massoniana Lamb .forest in Mountain of Western Hubei. *Hubei Forestry Science and Technology* (2011).

206 Panahandeh, T. *et al.* The performance of the reformulated Gash rainfall interception model in the Hyrcanian temperate forests of northern Iran. *Journal of Hydrology* **612**, 128092 (2022). <https://doi.org:10.1016/j.jhydrol.2022.128092>

207 Park, A., & Cameron, J. L. The influence of canopy traits on throughfalland stemflow in five tropical trees growing in a Panamanian plantation. *ForestEcology and Management* **255** (2008). <https://doi.org:10.1016/j.foreco.2007.12.025>

208 Peng, H., Li, X. and Tong, S. Effects of shrub (Caragana microphalla Lam.) encroachment on water redistribution and utilization in the typical steppe of Inner Mongolia. *Acta Ecologica Sinica* **34** (2014).

209 Pereira, F. L. *et al.* Modelling interception loss from evergreen oak Mediterranean savannas: Application of a tree-based modelling approach. *Agricultural and Forest Meteorology* **149**, 680-688 (2009). <https://doi.org:10.1016/j.agrformet.2008.10.014>

210 Price, A. G., Dunham, K., Carleton, T., & Band, L. Variability of water fluxes through the black spruce (Picea mariana) canopy and feather moss (Pleurozium schreberi) carpet in the boreal forest of Northern Manitoba. *Journal of Hydrology* **196** (1997). <https://doi.org:10.1016/S0022-1694(96)03233-7>

211 Pypker, T. G., Bond, B. J., Link, T. E., Marks, D. & Unsworth, M. H. The importance of canopy structure in controlling the interception loss of rainfall: Examples from a young and an old-growth Douglas-fir forest. *Agricultural and Forest Meteorology* **130**, 113-129 (2005). <https://doi.org:10.1016/j.agrformet.2005.03.003>

212 Wenjing, Q. Relationship Between Rainfall Redistribution Characteristics And Soil Nutrient And Structural Stability of Robinia Pseudoacacia Plantation. *Northwest A & F University* (2019).

213 Rao, A. S. Interception losses of rainfall from Cashew trees. *Journal of Hydrology* **90**, 293-301 (1987). <https://doi.org:10.1016/0022-1694(87)90072-2>

214 Regina, I. S., & Tarazona, T. Nutrient return to the soil through litterfalland throughfall under beech and pine stands of Sierra de la Demanda, Spain. (2000). <https://doi.org:10.1080/089030600406653>

215 Reid, L. M. & Lewis, J. Rates, timing, and mechanisms of rainfall interception loss in a coastal redwood forest. *Journal of Hydrology* **375**, 459-470 (2009). <https://doi.org:10.1016/j.jhydrol.2009.06.048>

216 Ren, Y., Xue, J. Characteristics of Precipitation in Castanopsis eyrei. Broad-Leaved Evergreen Forest of Wuyi Mountain. *Scientia Silvae Sinicae* **44** (2008).

217 Ren, S., Xiang, D., Xiao, W., Chen, J., Liang, Y., Yang, Z., Tang, Q., Wu, Q. Rainfall redistribution of Eucalypt plantation in Nanning, Guangxi, China. *Chinese Journal of Ecology* **36** (2017). <https://doi.org:10.13292/j.1000-4890.201706.037>

218 Ringgaard, R., Herbst, M. & Friborg, T. Partitioning forest evapotranspiration: Interception evaporation and the impact of canopy structure, local and regional advection. *Journal of Hydrology* **517**, 677-690 (2014). <https://doi.org:10.1016/j.jhydrol.2014.06.007>

219 Robson, A. J., Neal, C., Ryland, G. P. & Harrow, M. Spatial variations in throughfall chemistry at the small plot scale. *Journal of Hydrology* **158**, 107-122 (1994). <https://doi.org:10.1016/0022-1694(94)90048-5>

220 Ferreira Rodrigues, A. *et al.* Modeling canopy interception under drought conditions: The relevance of evaporation and extra sources of energy. *J Environ Manage* **292**, 112710 (2021). <https://doi.org:10.1016/j.jenvman.2021.112710>

221 Hao, R. Analysis of Hydrological Characteristics and Functions ofTypicalForest Stands in the Loess Plateau Area of Western Shanxi Province. (2015).

222 Sadeghi, S. M. M., Attarod, P., Grant Pypker, T. & Dunkerley, D. Is canopy interception increased in semiarid tree plantations? Evidence from a field investigation in Tehran, Iran. *Turkish Journal of Agriculture and Forestry* **38**, 792-806 (2014). <https://doi.org:10.3906/tar-1312-53>

223 Sadeghi, S. M. M., Attarod, P., Van Stan, J. T., Pypker, T. G. & Dunkerley, D. Efficiency of the reformulated Gash's interception model in semiarid afforestations. *Agricultural and Forest Meteorology* **201**, 76-85 (2015). <https://doi.org:10.1016/j.agrformet.2014.10.006>

224 Sadeghi, S. M. M., Attarod, P., Van Stan, J. T. & Pypker, T. G. The importance of considering rainfall partitioning in afforestation initiatives in semiarid climates: A comparison of common planted tree species in Tehran, Iran. *Science of The Total Environment* **568**, 845-855 (2016). <https://doi.org:10.1016/j.scitotenv.2016.06.048>

225 Saito, T. *et al.* Forest canopy interception loss exceeds wet canopy evaporation in Japanese cypress (Hinoki) and Japanese cedar (Sugi) plantations. *Journal of Hydrology* **507**, 287-299 (2013). <https://doi.org:10.1016/j.jhydrol.2013.09.053>

226 Schellekens, J., Scatena, F. N., Bruijnzeel, L. A. & Wickel, A. J. Modelling rainfall interception by a lowland tropical rain forest in northeastern Puerto Rico. *Journal of Hydrology* **225**, 168-184 (1999). <https://doi.org:10.1016/S0022-1694(99)00157-2>

227 Belmonte Serrato, F., & Romero Diaz, A. A simple technique formeasuring rainfall interception by small shrub: “interception flow collection box”. *Hydrological Processes* **12** (1998). <https://doi.org:10.1002/(SICI)1099-1085(19980315)12:3><471::AID-HYP586>3.0.CO;2-E

228 Tuya, S. The Study on Water Characteritics of Pinus TabulaeformisPlantation in Daqing Mountain of Innner Mongolia. (2009).

229 Houcai, S. The study ofrainfall redistribution and influncefactors in Korean pine forest. (2009).

230 Sheng, H. & Cai, T. Influence of Rainfall on Canopy Interception in Mixed Broad-Leaved—Korean Pine Forest in Xiaoxing’an Mountains, Northeastern China. *Forests* **10** (2019). <https://doi.org:10.3390/f10030248>

231 Sheng, H., Cai, T., Zhu, D., Shi, F. Rainfall Redistribution and Hydrochemical Characteristics in the Larch Plantation. *Journal of Soil and Water Conservation* **23** (2009). <https://doi.org:0.13870/j.cnki.stbcxb.2009.02.050>

232 Sheng, X., Wang, S., Guan, D., Jin, C., Wang, A., Wu, J., and Yuan, F. Canopy interception in larch plantations: Measurement and modeling in Eastern Liaoning Mountainous Region. *The Journal of Applied Ecology* **21** (2010). <https://doi.org:10.13287/j.1001-9332.2010.0465>

233 Sheng, H., Tijiu, C., LI, Y., Liu, Y. Rainfall Redistribution in Larix gmelinii Forest on Northern of Daxing’ an Mountains, North-east of China. *Journal of Soil and Water Conservation* **28** (2014). <https://doi.org:10.13870/j.cnki.stbcxb.2014.06.019>

234 Sheng, H., Guo, N., Ju, C., Shi, L., Cai, T. Rainfall redistribution characteristics of Juglans mandshurica plantation in Harbin. *Journal of Arid Land Resources and Environment* **32** (2018). <https://doi.org:10.13448/j.cnki.jalre.2018.216>

235 Sheng, H., Yao, Y., Cai, T., Guo, N., Ju, C. Effects of phenoseason on transfer of potassium and sodium ions in the process of rainfall redistribution in larch (Larix gmelinii) plantations. *Journal of Nanjing Forestry University* **45** (2021). <https://doi.org:10.12302/j.issn.1000-2006.202102012>

236 Yu, S. Eco-hydrological Process Analysis on Forest Ecosystemsof Major Dominant Species in Beijing mountainous area. (2011).

237 Lei, S. The study ofrainfall redistribution process andnutrition elements flux in urban plantation ecosystem, Northeastern China. (2016).

238 Shi, Z., Wang, Y., PengtaoYu, Xiong, W., Guo, H., Guo, M. Study on Different Forestry Vegetationʾs Eco-hydrological Function in Liupan Mountain of Ningxia China. *Journal of Soil and Water Conservation* **19** (2005). <https://doi.org:10.13870/j.cnki.stbcxb.2005.03.033>

239 Shi, Z., Wang, Y., Xu, L., Xiong, W., Yu, P., Guo, H. Rainfall redistribution and its spatial variation i n the stand of Pinus armandii in the Liupan Mountains , China. *Acta Ecological Sinica* **29** (2009).

240 Shi, Z., Zhang, N., HEChangqing, Qiu, Z., Xu, D., Gao, J., Hu, Z. Eco-|hydrological effect of the canopy, litter and soil of a eucalyptus plantation in South China. *Acta Ecologica Sinica* **30** (2011). <https://doi.org:10.20103/j.stxb.2010.07.033>

241 Shi, L., Sheng, H., Man, X., Cai, T. Rainfall redistribution and the spatial heterogeneity of throughfall in Larix gmelinii forest,northeast China. *Journal of Nanjing Forestry University* **41** (2017). <https://doi.org:10.3969/j.issn.1000-2006.2017.02.013>

242 Shinohara, Y., Komatsu, H., Kuramoto, K. & Otsuki, K. Characteristics of canopy interception loss in Moso bamboo forests of Japan. *Hydrological Processes* **27**, 2041-2047 (2012). <https://doi.org:10.1002/hyp.9359>

243 Shinohara, Y., Levia, D. F., Komatsu, H., Nogata, M. & Otsuki, K. Comparative modeling of the effects of intensive thinning on canopy interception loss in a Japanese cedar (Cryptomeria japonica D. Don) forest of western Japan. *Agricultural and Forest Meteorology* **214-215**, 148-156 (2015). <https://doi.org:10.1016/j.agrformet.2015.08.257>

244 Shou, W. *et al.* Rainfall partitioning characteristics of three typical sand-fixing shrubs in Horqin Sand Land, north-eastern China. *Hydrology Research* **48**, 571-583 (2017). <https://doi.org:10.2166/nh.2016.177>

245 Shuttleworth, W. J. Evaporation from Amazonian rainforest. *Proceedings of the Royal Society of London. Series B. Biological Sciences* **233**, 321-346 (1997). <https://doi.org:10.1098/rspb.1988.0024>

246 Siles, P., Vaast, P., Dreyer, E. & Harmand, J.-M. Rainfall partitioning into throughfall, stemflow and interception loss in a coffee (Coffea arabica L.) monoculture compared to an agroforestry system with Inga densiflora. *Journal of Hydrology* **395**, 39-48 (2010). <https://doi.org:10.1016/j.jhydrol.2010.10.005>

247 Silva, I. C. & Rodríguez, H. G. Interception loss, throughfall and stemflow chemistry in pine and oak forests in northeastern Mexico. *Tree Physiology* **21**, 1009–1013 (2001). <https://doi.org:10.1093/treephys/21.12-13.1009>

248 Sinun, W., Meng, W. W., Douglas, I. & Spencer, T. Throughfall, stemflow, overland flow and throughflow in the Ulu Segama rain forest, Sabah, Malaysia. *Royal Society* **335** (1992). <https://doi.org:10.1098/rstb.1992.0030>

249 Snelgrove, J. R., Buttle, J. M., & Tetzlaff, D. Importance ofrainfallpartitioning in a northern mixed forest canopy for soil water isotopic signatures in ecohydrological studies. *Hydrological Processes* **34** (2020). <https://doi.org:10.1002/hyp.13584>

250 Soulsby, C., Braun, H., Sprenger, M., Weiler, M., & Tetzlaff, D. Influence of forest and shrub canopies on precipitation partitioning and isotopic signatures. *Hydrological Processes* **31** (2017). <https://doi.org:10.1002/hyp.11351>

251 Šraj, M., Brilly, M. & Mikoš, M. Rainfall interception by two deciduous Mediterranean forests of contrasting stature in Slovenia. *Agricultural and Forest Meteorology* **148**, 121-134 (2008). <https://doi.org:10.1016/j.agrformet.2007.09.007>

252 Staelens, J., De Schrijver, A., Verheyen, K. & Verhoest, N. E. C. Rainfall partitioning into throughfall, stemflow, and interception within a single beech (Fagus sylvatica L.) canopy: influence of foliation, rain event characteristics, and meteorology. *Hydrological Processes* **22**, 33-45 (2007). <https://doi.org:10.1002/hyp.6610>

253 Su, L., Zhao, C., Xu, W. & Xie, Z. Modelling interception loss using the revised Gash model: a case study in a mixed evergreen and deciduous broadleaved forest in China. *Ecohydrology* **9**, 1580-1589 (2016). <https://doi.org:10.1002/eco.1749>

254 Sui, Y., Xu, X., Zhang, Y., Ou, Y., Yan, B., Wang, P., Cui, H., Cui, B. Characteristics of precipitation interception in soil and water conservation forests of the Northeast black soil areas of China. *Acta Prataculturae Sinica* **24** (2015). <https://doi.org:10.11686/cyxb2014305>

255 Changdan, S. Study on water conservation function of the Picea crossifolia in central of Qilian Mountains. (2010).

256 SUN, X., WANG, G., LIN, Y., LIU, L. & GAO, Y. Intercepted rainfall in Abies fabri forest with different-aged stands in southwestern China. *Turkish Journal of Agriculture and Forestry* **37**, 495-504 (2013). <https://doi.org:10.3906/tar-1207-36>

257 Sun, X., Onda, Y. & Kato, H. Incident rainfall partitioning and canopy interception modeling for an abandoned Japanese cypress stand. *Journal of Forest Research* **19**, 317-328 (2017). <https://doi.org:10.1007/s10310-013-0421-2>

258 Sun, Z., Wang, C., Wang, X., Zhang, Q. Rainfall redistribution patterns and their influencing factors of two temperate deciduous forests. *Acta Ecologica Sinica* **34** (2014). <https://doi.org:10.5846/stxb201301240146>

259 Sun, X., Onda, Y., Kato, H., Gomi, T. & Komatsu, H. Effect of strip thinning on rainfall interception in a Japanese cypress plantation. *Journal of Hydrology* **525**, 607-618 (2015). <https://doi.org:10.1016/j.jhydrol.2015.04.023>

260 Sun, S. *et al.* Higher canopy interception capacity of forests restored to the climax stage in subtropical China. *Hydrological Processes* **36** (2022). <https://doi.org:10.1002/hyp.14538>

261 Swaffer, B. A., Holland, K. L., Doody, T. M., & Hutson, J. Rainfall partitioning, tree form and measurement scale: a comparison of two co-occurring,morphologically distinct tree species in a semi‐arid environment. *Ecohydrology* **7** (2014). <https://doi.org:10.1002/eco.1461>

262 Takagi, M. Evapotranspiration and deep percolation of a smallcatchment with a mature Japanese cypress plantation. *Journal of Forest Research* **18** (2013). <https://doi.org:10.1007/s10310-011-0321-2>

263 Tallaksen, L. M., Schunselaar, S. & Veen, R. v. Comparative Model Estimates of Interception Loss in a Coniferous Forest Stand. *Hydrology Research* **27**, 143-160 (1996). <https://doi.org:10.2166/nh.1996.0001>

264 Távora, B. E. & Koide, S. Event-Based Rainfall Interception Modeling in a Cerrado Riparian Forest—Central Brazil: An Alternative Approach to the IS Method for Parameterization of the Gash Model. *Water* **12** (2020). <https://doi.org:10.3390/w12082128>

265 yehong, T. Research on Rainfall Redistribution and SoilWater Conservation Functions of Betula platyphyllaSecondary Forests in Da Xing' an Mountains. (2014).

266 Tian, F., Zhao, C., Feng, Z., Peng, S., Peng, H. Eco-hydrological effects of Qinghai spruce(Picea crassifolia) canopy and its influence factors in the Qilian Mountains. *Acta Ecologica Sinica* **32** (2012). <https://doi.org:10.5846/stxb201012261845>

267 Tian, N. e. a. Redistribution of Rainfall in Canopy of Caragana intermedia. *Arid Zone Research* **36** (2019).

268 Toba, T., & Ohta, T. An observational study of the factors that influence interception loss in boreal and temperate forests. *Journal of Hydrology* **313** (2005). <https://doi.org:10.1016/j.jhydrol.2005.03.003>

269 Tu, L. *et al.* Integrated effects of rainfall regime and canopy structure on interception loss: A comparative modelling analysis for an artificial larch forest. *Ecohydrology* **14** (2021). <https://doi.org:10.1002/eco.2283>

270 Valente, F., David, J. S. & Gash, J. H. C. Modelling interception loss for two sparse eucalypt and pine forests in central Portugal using reformulated Rutter and Gash analytical models. *Journal of Hydrology* **190**, 141-162 (1997). <https://doi.org:10.1016/S0022-1694(96)03066-1>

271 VanDijk, A. I. J. M. & Bruijnzeel, L. A. Modelling rainfall interception by vegetation of variable density using an adapted analytical model. Part 2. Model validation for a tropical upland mixed cropping system. *Journal of Hydrology* **247** (2001). <https://doi.org:10.1016/S0022-1694(01)00393-6>

272 Van Stan, J. T., Levia, D. F. & Jenkins, R. B. Forest Canopy Interception Loss Across Temporal Scales: Implications for Urban Greening Initiatives. *The Professional Geographer* **67**, 41-51 (2014). <https://doi.org:10.1080/00330124.2014.888628>

273 Van Stan, J. T., Coenders‐Gerrits, M., Dibble, M., Bogeholz, P. & Norman, Z. Effects of phenology and meteorological disturbance on litter rainfall interception for a Pinus elliottii stand in the Southeastern United States. *Hydrological Processes* **31**, 3719-3728 (2017). <https://doi.org:10.1002/hyp.11292>

274 Vernimmen, R. R. E., Bruijnzeel, L. A., Romdoni, A. & Proctor, J. Rainfall interception in three contrasting lowland rain forest types in Central Kalimantan, Indonesia. *Journal of Hydrology* **340**, 217-232 (2007). <https://doi.org:10.1016/j.jhydrol.2007.04.009>

275 Viville, D., Biron, P., Granier, A., Dambrine, E. & Probst, A. Interception in a mountainous declining spruce stand in the Strengbach catchment (Vosges, France). *Journal of Hydrology* **144**, 273-282 (1993). <https://doi.org:10.1016/0022-1694(93)90175-9>

276 Wallace, J. & McJannet, D. On interception modelling of a lowland coastal rainforest in northern Queensland, Australia. *Journal of Hydrology* **329**, 477-488 (2006). <https://doi.org:10.1016/j.jhydrol.2006.03.003>

277 Wallace, J. & McJannet, D. Modelling interception in coastal and montane rainforests in northern Queensland, Australia. *Journal of Hydrology* **348**, 480-495 (2008). <https://doi.org:10.1016/j.jhydrol.2007.10.019>

278 Rui, W. Effect of Different Vegetation Types on the Hydrological Process and Water Quality in the Lanlinxi Small Watershed. (2007).

279 Wan, Y., Liu, X., Wang, S., Yu, P., Li, G., Jing, W., Li, X. Rainfall Canopy Partitioning and Its Influencing Factors of Picea crassifolia Forest in the Qianlian Mountains. *Journal of Soil and Water Conservation* **30** (2016).

280 Wan, Y. e. a. Characteristics of Rainfall Canopy Partitioning for Berberis diaphana and Caragana tangutica Shrub in the Qianlian Mountains. *Journal of Soil and Water Conservation* **30** (2016).

281 Daqing, W. Research on Runoff Formation and Sediment Yield in the Natura!Conservation Area of Tianchi Lake in Xinjiang. (2009).

282 Wang, B. Impacts of typical forests on rainfall redistribution processes in Xinjiang. (2013).

283 Wang, Y. Effects of Broad-leaved Forest on Rainfall Redistribution in Mountain Land in Northern Hebei Province. *Bulletin of Soil and Water Conservation* **38** (2018).

284 Wang, D. & Wang, L. Rainfall partitioning and its effects on regional water balances: Evidence from the conversion of traditional cropland to apple orchards in a semi‐humid region. *Hydrological Processes* **34**, 4628-4639 (2020). <https://doi.org:10.1002/hyp.13891>

285 Wang, X., Zhang, Y., Liu, W. Modeling canopy rainfall interception of a tropical seasonal rainforest in Xishuangbanna. *Acta Ecologica Sinica* **26** (2006).

286 Wang, Y., Wang, L., Wei, S. Modeling canopy rainfall interception of a replanted Robinia pseudoacacia forest in the Loess Plateau. *Acta Ecologica Sinica* **32** (2012).

287 Wang, L., Zhang, Q., Shao, M. a. & Wang, Q. Rainfall Interception in a Robinia pseudoacacia Forest Stand: Estimates Using Gash’s Analytical Model. *Journal of Hydrologic Engineering* **18**, 474-479 (2013). <https://doi.org:10.1061/(asce)he.1943-5584.0000640>

288 Wang, T., Zhu, L., Zhao, X. and Lan, Y. Rainfall redistribution characteristics of three typical sand-fixing shrubs. *Journal of Arid Land Resources and Environment* **35** (2021). <https://doi.org:10.13448/j.cnki.jalre.2021.220>

289 Wang, Y., Nie, Z., Yang, F., Jia, X. Evapotranspiration Characteristics of Pinus tabuliformis Plantation in the Arboretum of Inner Mongolia Academy of Forestry. *Journal of Inner Mongolia Forestry Science & Technology* **48** (2022).

290 Waterloo, M. J., Bruijnzeel, L. A., Vugts, H. F. & Rawaqa, T. T. Evaporation from Pinus caribaea plantations on former grassland soils under maritime tropical conditions. *Water Resources Research* **35**, 2133-2144 (1999). <https://doi.org:10.1029/1999wr900006>

291 Wei, J., Wu, G. Hydro-ecological effects of artificial Pinus tabulaeformis carr. and Hippophae rhamnoides stands in low mountainous upland of western Liaoning Province China. *Acta Ecologica Sinica* **26** (2006).

292 Whelan, M. J. & Anderson, J. M. Modelling spatial patterns of throughfall and interception loss in a Norway spruce (Picea abies) plantation at the plot scale. *Journal of Hydrology* **186**, 335-354 (1996). <https://doi.org:10.1016/S0022-1694(96)03020-X>

293 Whitehead, D. & Kelliher, F. M. A canopy water balance model for a Pinus radiata stand before and after thinning. *Agricultural and Forest Meteorology* **55**, 109-126 (1991). <https://doi.org:10.1016/0168-1923(91)90025-L>

294 Whitworth-Hulse, J. I. *et al.* Advantages of rainfall partitioning by the global invader Ligustrum lucidum over the dominant native Lithraea molleoides in a dry forest. *Agricultural and Forest Meteorology* **290** (2020). <https://doi.org:10.1016/j.agrformet.2020.108013>

295 Wu, X., Zhou, M., Zhang, H. The relationship between rainfall rainfall intensity and interception by canopy of larix gmeliniirurp. Forest in daxinganling mountains. *Journal of Inner Mongolia Agricultural University* **27** (2006).

296 Wu, W., Li, P., Sun, X., Yu, X. Distribution Traits of Precipitation of Pinus tabulaeformis, Quercus variabilis and Mixed Forest of West Mountains in Beijing. *Journal of North-East Forestry University* **41** (2013).

297 Xiangyou, X. Effects of Water Storage and Soil ConservationFuntion of Typical Forests in Northeast Forestry Reserves of China. (2016).

298 Yang, X. Study on the adjustment and control mechanism of forest tononpoint source pollution in Bejing Mountain Area. (2008).

299 Xu, X., Wang, Q. & Hirata, E. Precipitation partitioning and related nutrient fluxes in a subtropical forest in Okinawa, Japan. *Annals of Forest Science* **62**, 245-252 (2005). <https://doi.org:10.1051/forest:2005016>

300 Xu, L., Guan, Q., Zhao, Z., Zhang, Y., Sui, Z., Sui, H., Song, Y., Li, Y., Zhao, H. Canopy Rainfall Interception Characteristics of Two Typical Forest Types in Changbai Mountains and Its Revised Gash Model Simulation. *Journal of North-East Forestry University* **47** (2019).

301 Xu, L. *et al.* Components of stand water balance of a larch plantation after thinning during the extremely wet and dry years in the Loess Plateau, China. *Global Ecology and Conservation* **24** (2020). <https://doi.org:10.1016/j.gecco.2020.e01307>

302 Xue, T., Li, Y., Guo, N., Sheng, H. Canopy Interception of Rainfall Partitioning by Pinus sylvestris var. mongolica Plantation in An Urban Area. *Journal of North-East Forestry University* **49** (2021). <https://doi.org:10.13759/j.cnki.dlxb.2021.08.007>

303 Yan, W., Chen, S., Tian, D., Kang, W. Contribution of Cinnamomum Camphora （L.） Presl Plantation to Precipitation Redistribution. *Bulletin of Soil and Water Conservation* **25** (2005). <https://doi.org:10.13961/j.cnki.stbctb.2005.06.003>

304 Yang, H. Study on the rules of water consumption of dominant treespecies and the community of artificial forestin Mountain Area of Northern China. (2007).

305 Yang, Q. Canopy rainfall interception capacity and its influential factors of typical grassland communities in the loess hilly-gully region. (2020).

306 Zhuo, Y. Comparison of Canopy Interception Characteristicsof Chinese Fir Forest due to Different Densities inDagangshan Mountain of Jiangxi Province. (2014).

307 Yuan, Y., Wang, D., Liu, X., Lin, Y., Zeng, Z. Characteristics of Canopy Interception of Larix kaempferi in Xiaolongshan Forest. *Journal of Northwest Forestry College* **28** (2013). <https://doi.org:10.3969/j.issn.1007-7461.2013.06.04>

308 Yuan, X., Xiao, W., Lei, J., Pan, L., Wang, X., Cui, H., Hu, W. Spatial Variability of Throughfall and Stemflow in Pinus massoniana Plantation in Three Gorges Reservoir Area. *Scientia Silvae Sinicae* **56** (2020). <https://doi.org:10.11707/j.1001-7488.20200102>

309 Yue, X. e. a. Characteristics of rainfall interception and redistribution for Salix gordejevii in Horqin Sandy Land, Northeast China. *Acta Prataculturae Sinica* **22** (2013). <https://doi.org:10.11686/cyxb20130606>

310 Zabret, K., Rakovec, J., & Šraj, M. Influence of meteorological variables on rainfall partitioning for deciduous and coniferous tree species in urban area. *Journal of Hydrology* **558** (2018). <https://doi.org:10.1016/j.jhydrol.2018.01.025>

311 Zhai, J., Zhang, Z., Hu, H., Cao, J. Study on the distribution pattern of precipitation in Quercus acutissima forest of Purple Mountain. *Journal of Forestry Engineering* **25** (2011). <https://doi.org:10.3969/j.issn.1000-8101.2011.04.016>

312 Xiaobei, Z. Ecohydrological Impact Assessment among Larixprincipis-rupprechtii Plantation with Different Densitiesat the South Part of Liupan Mountains in Ningxia. (2012).

313 Zhang, G. *et al.* Modelling and measurement of two-layer-canopy interception losses in a subtropical evergreen forest of central-south China. *Hydrology and Earth System Sciences* **10** (2006). <https://doi.org:10.5194/hess-10-65-2006>

314 Zhang, H., Zhou, M., Wu, X. Contrasting Analysis on Characteristics of Rainfall Interception in Virgin Forest and Successive Cutting Forest of Larix gmelinii. *Inner M ongolia Forestry Investigation and Design* **29** (2006). <https://doi.org:10.13387/j.cnki.nmld.2006.04.020>

315 Zhang, H., Li, C., Dong, X. Influence of Forest Canopy in Low-Quality Stands in Lesser Xingan Mountains on Rainfall Interception. *Journal of North-East Forestry University* **40** (2012). <https://doi.org:10.13759/j.cnki.dlxb.2012.04.028>

316 Zhang, Y., Wang, X., Hu, R., Pan, Y., & Zhang, H. Stemflow in two xerophytic shrubs and its significance to soil water and nutrient enrichment. *Ecological Research* **28** (2013). <https://doi.org:10.1007/s11284-013-1046-9>

317 Zhang, N., Guo, B., Zhang, G., Zhang, C., Zhang, N., Zhang, J., Gu, J. Study on Effect of Natural secondary forest on Rainfall Redistribution Processes Along the Dam Area. *Research of Soil and Water Conservation* **22** (2015). <https://doi.org:10.13869/j.cnki.rswc.2015.06.013>

318 Zhang, N., Lu, G., Guo, B., Zhang, G., Yang, C., Ma, X., Zhang, J. Study on Effect of Larix principis-rupprechtii Mayr Plantation on Rainfall Redistribution Processes in the Mulan-Weichang. *Research of Soil and Water Conservation* **22** (2015). <https://doi.org:10.13869/j.cnki.rswc.2015.05.058>

319 Zhang, Y.-f., Wang, X.-p., Hu, R., Pan, Y.-x. & Paradeloc, M. Rainfall partitioning into throughfall, stemflow and interception loss by two xerophytic shrubs within a rain-fed re-vegetated desert ecosystem, northwestern China. *Journal of Hydrology* **527**, 1084-1095 (2015). <https://doi.org:10.1016/j.jhydrol.2015.05.060>

320 Zhang, Z. S., Zhao, Y., Li, X. R., Huang, L. & Tan, H. J. Gross rainfall amount and maximum rainfall intensity in 60-minute influence on interception loss of shrubs: a 10-year observation in the Tengger Desert. *Sci Rep* **6**, 26030 (2016). <https://doi.org:10.1038/srep26030>

321 Zhang, Y. *et al.* Modeling rainfall interception loss by two xerophytic shrubs in the Loess Plateau. *Hydrological Processes* **31**, 1926-1937 (2017). <https://doi.org:10.1002/hyp.11157>

322 Zhang, S. Y., Li, X. Y., Jiang, Z. Y., Li, D. Q. & Lin, H. Modelling of rainfall partitioning by a deciduous shrub using a variable parameters Gash model. *Ecohydrology* **11** (2018). <https://doi.org:10.1002/eco.2011>

323 Zhang, J. *et al.* Typhoon-induced changes in rainfall interception loss from a tropical multi-species ‘reforest’. *Journal of Hydrology* **568**, 658-675 (2019). <https://doi.org:10.1016/j.jhydrol.2018.11.024>

324 Zhang, J., Zheng, L., Chen, L., Min, H., Li, H., Liu, S., Wu, S., Yang, L. Effects of Rainfall Characteristics on Rainfall Partitioning in Plantation of Pinus Massonianain South Subtropical. *Journal of Soil and Water Conservation* **35** (2021). <https://doi.org:10.13970/j.cnki.stbcxb.2021.01.026>

325 Zhang, X., Zhao, J., Lei, L. and Wang, D. Characteristics of Rainfall Redistribution of Six Shrubs in Eastern Qilian Mountain. *Chinese Journal of Grassland* **43** (2021). <https://doi.org:10.16742/j.zgcdxb.20190327>

326 Zhang, Y., Xie, J., Chen, G., Tian, Y., Zhou, H. Characteristics of rainfall redistribution of rubber plantations at different ages in Xishuangbanna. *Journal of Tropical Biology* **13** (2022). <https://doi.org:10.15886/j.cnki.rdswxb.2022.01.009>

327 Zhao, L., Yan, W., Xiang, W., Liang, X., Wu, Q. Analysis of canopy interception effects on Cinnamomum camphora plantation. *Journal of Central South University of Forestry & Technology* **33** (2013). <https://doi.org:10.14067/j.cnki.1673-923x.2013.05.027>

328 Zhao, W., Ding, F., Liu, Y., Wu, P., Cui , Y. Research on rainfall redistribution in karst natural forest. *Journal of Central South University of Forestry & Technology* **37** (2017). <https://doi.org:10.14067/j.cnki.1673-923x.2017.03.015>

329 Zhao, W. e. a. Rainfall partitioning patterns of the desert shrub Nitraria sphaerocarpa and its influencing factors in drylands of northwest China. *Acta Ecologica Sinica* **42** (2021). <https://doi.org:10.5846/stxb202101220229>

330 Zheng, J., Fan, J., Zhang, F., Yan, S. & Xiang, Y. Rainfall partitioning into throughfall, stemflow and interception loss by maize canopy on the semi-arid Loess Plateau of China. *Agricultural Water Management* **195**, 25-36 (2018). <https://doi.org:10.1016/j.agwat.2017.09.013>

331 Zheng, J. *et al.* Throughfall and stemflow heterogeneity under the maize canopy and its effect on soil water distribution at the row scale. *Sci Total Environ* **660**, 1367-1382 (2019). <https://doi.org:10.1016/j.scitotenv.2019.01.104>

332 Zhong, L., Wen, S. Canopy interception and changes in nutrient concentrations in a Liquidambar formosana plantation in Tianjiling forestry farm. *Journal of Central South University of Forestry & Technology* **30** (2010). <https://doi.org:0.14067/j.cnki.1673-923x.2010.02.014>

333 Zhou, B., Han, H., Kang, F., Cheng, X., Song, Y., Liu, K., Li, Y. Characteristics of precipitation distribution in Pinus tabulaeformis plantations under different canopy coverage in Taiyue Mountain. *Acta Ecologica Sinica* **33** (2013). <https://doi.org:10.5846/stxb201206060818>

334 Luping, Z. Study on the water conservation function and identification of key areas in the landscape water source area of Hani terraces. (2015).
